# Supplementary material for: Research on Chinese Consumers’ Attitudes Analysis of Big-Data Driven Price Discrimination Based on Machine Learning
Source: Front Psychol. 2022 Feb 1;12:803212. doi: 10.3389/fpsyg.2021.803212 (PMC8844018; doi:10.3389/fpsyg.2021.803212)
Supplement: Supplementary file 2 [file Table_2.xlsx]

## Sheet: Sheet1
ID	Comments
3	According to your logic, Ma Yun which day caught a cold, buy a box of cold medicine can not be 100 billion?
4	Capitalist version on demand??
5	Originally not in the physical store consumption, is because the young is always shouted by the other side, also do not let to speak.Quite hate kill ripe, now book the hotel will first call to ask, where to go to such app is a lifetime will never use.
6	People who can't talk about the price finally think that online shopping is a lifeline and the price is transparent. As long as you can penetrate the P map to see the bottom layer and restore the moderate sense of space in the 3D dimension from the 2D picture, you can still shop normally. Now it has finally evolved to the homogenization stage where you have to bargain with people.
7	will not.There will always be platforms that compete with unfamiliar or unfamiliar platforms, making the latter impossible to go too much, otherwise it will lower the entry threshold for competitors
9	Not all goods are life and death, and if so, a big data system to sell him slightly above the lowest buyer, because it is profitable.
11	It is unlikely to be so serious, the beginning price of price discrimination is determined by market demand.For example, when you go to the scenic spot to buy water, there is only one store on the island, and the price of water is at most three times the normal.And the main idea is too little about market regulation and government regulation.For example, if an A store sells 500 band-aid with big …
14	The idea is no longer imaginary, and Alibaba has used face recognition data to reach a big data cooperation with three physical squirrel stores.
16	Big data plus the Internet will quickly aggravate the negative effects
17	Can big data kill those related to industry?
18	Big data, it is fair to kill mature. A merchants made profits by killing cooked, but he also becomes part of the big data, unless he only buys everything he needs in his store without any outside contact, maybe he will go to 10,000 public toilet
19	When you're so rich as to become a famous billionaire, you buy cheaper, and don't even have to give you free. Earlier, Mark Twain's Million pound Bill, and Trump barely paid for a restaurant before he was elected president.
22	For the maintenance of consumer rights and interests, really very weak, a business out of the scandal is casual public relations, still comfortable, kill event is just a small microcosm, corporate ethics can say even cover, such as slag waves, such as baidu, such as jingdong, many many, promise not to cash wrangling too much, no bottom line without the cost of evil is too low
26	Feel that Taobao will buy this magic thing in the future
30	No wonder I Tmall search clothes and shoes over and over only recommend that a few brands!!
34	Moreover, if those big platforms master a variety of data on food, clothing, food, housing and transportation, and steal the users 'private data, it is easy to analyze the users' personality in the future.Those careless users secretly kill him, those weak customers bully him with various discriminatory terms, nothing to do and background and have no financial users can kill, such you can accept t…
38	There are so many trading platforms on the Internet, which is much more reliable than the physical stores.
39	From another point of view, big data increases the information asymmetry between consumers and merchants, so consumers have to suffer.
40	Will create new careers, collect coupons, buy goods, buy low, buy and sell high, and balance prices?
41	Price discrimination is limited by the scene, in fact, band-aid is not appropriate, so that everyone is cut, I opened a affordable pharmacy next to it, and the previous pharmacy soon closed down.The core point of price discrimination is to sell some goods at a discount in order to sell more goods, but this discount channel is hidden and cumbersome, and will not affect the choice of the original c…
42	Price discrimination has long existed, simply because the poor and the rich have the highest willingness to pay, which is not equal, and it is urgent to give the pot to big data.The information revolution can undoubtedly drive great progress in society, and it is normal to start a little pain.Hope to enjoy the benefits of social progress, do not want to accompany this society together to break th…
44	To put capital interests above the basic needs of human life is anti-human.
51	The evil thing is that this kind of thing won't happen in pharmacies, because B will sell band-aids to A at a low price, but it will appear on the Internet, because no one will know how much their neighbors' band-aids go online.The Internet originally aims to give us information, but workers are much less able to obtain information than capitalists.
52	But according to economics, if there are no information barriers (where both people see each other buy band-aids), they trade...
54	But now even if there is no big data, such as air tickets or different prices ah, big data at best, it is ridiculous to push the pot to big data
59	If Marx saw this, he would inevitably write another example of the original crime to capitalism.Pour milk into the river is nothing.
60	It doesn't matter, who dare to do so, there are competitors to give him the price, send a fatal blow.That is why you welcome Meituan to fight against Didi so much.
61	Some east has begun to do so, his account and a friend account, see the price of the same commodity will be different.
62	You have a valuation bottom line, expensive do not buy the line.
64	Your idea has a gross relationship with big data, the direct price of 500 equally is not finished, why drive the latter out?
68	Putian doctors used to be a big human flesh data processing system
69	In fact, this similar strategy has been started in the data background of Tmall. As a store operation, we can directly send coupons to customers who have been following the store products for a long time to attract new customers
70	The former kill is Zhongguancun and other computer city, look at the consequences now know, if a wave, the opportunity to come.
75	What if the price increase by 10% is 5% to the business, 5% to the platform??
76	And if everyone can enjoy all the services and goods needed at an affordable price, what is this, this is communism.Everyone goes to the job he wants to do.Just the future that you can meet will not reach so ideal.
82	In fact, I found that many platforms already use big data like this, kill ripe!!
84	In fact, in this case, there will be a price platform between consumers, and we will immediately find out who buys the cheapest thing at the moment, and then the person will immediately buy the product and sell it to others.In this kind of society, the door of the drugstore will squat a selling band-aid scalpers.
85	Yes, but this use of account history or browser Cookie caused controversy a decade ago, so overseas browsers generally had anonymous browsing mode a decade ago.Now, the technology can record the mac address and other unique locking. Under the big data platform analysis, only the face can be identified, and this price discrimination will not only appear on the Internet.
86	Does body tor tissue?Cain data loss of significance?
90	So I would rather buy on Taobao, see a few more, more than a few, looking for the right price to start.
92	Perfect it shows the ugly eating face of capitalism
94	In my opinion, the employees of Alibaba, Baidu and Jingdong go to the hospital to see a doctor, and the hospital should use big data to price it.If Ma Yun heart disease to first aid, how can not collect a 10 billion start?
95	I think the store would spend a lot of effort to find someone who wanted to spend 500 yuan for band-aids, and ignore 5 yuan for band-aids.After all, you just use big data to screen, let the former enter, reject the latter enter, and let the latter die outside the door.In this way, the former will not feel unfair and willing to take out 500 dollars, while the latter is dead and you don't care abou…
98	Last time I saw that Alibaba was focusing on relevant departments in various provinces, giving certain preferential treatment but requiring all the medical insurance hospitalization information on Ali Cloud.Think about it very much
99	Can I register for a new account number
100	I have always been disgusted with this big data, our school everyone also do this, really disgusted, all kinds of privacy under the guise of convenience
101	I have a question, what if this big data killing enterprise is a state-owned capital background?
105	Next step: control your spirit, let you have the will to give all the money to me, I am not responsible for the consequences.
107	Now preparing to invest in a face recognition company, one of their business directions is new retail, in short, identifying the customer-analyzing the customer needs-providing services, about the logic stated in this case.Technology is no good or evil, but in the hands of different people, or to improve customers' consumption experience, or to seek more benefits for businesses.What feels scary i…
109	I would definitely complain if the price was different
110	There are already examples, using different operating system phones to query the same goods on the same website for different prices, such as iphone is more expensive than android.The website has clearly marked the price, but there is price discrimination.It's not an imaginative thing, it's a naked reality.
111	In the future, real killing will not let you find killing ripe. Big data will automatically analyze all the news channels that you may have access to, including all those you know, which will isolate you a perfect killing environment, making it impossible to find that you are killed.
112	Because of the need for temporary capital turnover, the Jingdong Gold bar and China Merchants Bank found that the interest to me was higher than that to my friends, my friend's economic situation was similar to me, only limited to credit investigation.
113	It has long happened to buy preferential goods and sell them cheaply on salted fish.
114	In Tmall international direct sale received 300 minus 40 coupons, bought a bottle of Philojia eye cream for the first time, 299 finally 259 hand.Later, there are three hundred minus 40 activities but how also can not buy this eye cream, said that which area is no goods, for the country any place is no goods.When this activity is gone, can not use the voucher to reduce the money, this eye cream bu…
115	See Canadian CBS Marketplace, consumption habits different net to buy different prices https: / / youtu.be/NZVpbwz6kPk
116	This will not grow to this point.The first price principle is also established in this, the same commodity should be the same price, otherwise there will be arbitrage space. The reason why no arbitrage now is because of the problem of arbitrage cost.The price rises and falls of big data are destined to only occur in a small range of unprofitable arbitrage, just like the case of currency prices fl…
118	That's not big data
120	With this problem, we can't all be blamed to big data, because big data cannot only play a role in terms of prices. People who buy band-aids for 500 yuan can also buy them from those who buy band-aids for 10 yuan
121	This has long been concluded in economics, called price discrimination, which is designed to maximize the residual value of consumers
122	What's that different from capitalism
127	This achieved the first of three price discrimination, 6666
128	This is...Price discrimination in economics?_(:з」∠)_
132	How many more software do you still call takeout right now?After the monopoly naturally to rise in price, kill the ripe, kill the pig ah, grab the market to burn those money you pay?Who eats sugar, who has been beaten, has never heard of it
138	Uninstall drops
142	Return to the taxi
143	Pay attention to see that the price is lower that there is a coupon, the small word written clearly, Mr.Zhou and the media can not see clearly or do not understand the platform coupon subsidies for new customers' daily operation concessions?
144	Big data killing does exist, but this 12 km difference of 8 yuan is too much nonsense to be eye-catching. When I don't often use it, it is cheap
145	What is the small word below the price on the right?Isn't it coupons or something?
146	The relevant state departments should severely punish this behavior, where to go and Meituan also have such problems, other do not know whether or not
147	Isn't it been reported before big data is familiar
149	Yes, on the same section of the road, almost every taxi price is different, and it shows that the final price settlement may also increase in price, depending on Didi's mood
151	Internet platform, convenient for users at the same time but the most important integrity of doing business lost completely.Can punishment be heavier [hand] [hand] [hand]
152	When I get off the car showed 22, but the app does not upgrade cannot pay treasure to bind my bank card, go home to upgrade the program after the payment price becomes 24, textbook like technology for evil
154	Reply @professor_Kong: Flower pig is Didi?I spit it up, no wonder
155	Last week, I met in the same place, with two mobile phones to hit Didi, the round-trip price was 10 yuan worse
157	Is a regular taxi??
161	The same distance between the two places, the round price is different
162	In fact, the mobile phone budget trajectory and time is not the same, there is no way to avoid this, I also make a line of system products
163	Didi has raised a pile of trumpets, which is to prevent the monopoly law
165	So no taxi software [sad] [sad]
166	@ Didi Chuxing
167	Too realistic, I take the same route as my friend's phone, I cheap, [laugh cry]
168	Didi is not pricing drivers at all, but meter.So the driver pricing has never changed, the platform's so-called draw is a change, so that the passengers pay is different, death is
171	The same mobile phone, hit the same route, the price seems to have never been the same [two ha]
175	Ctrip, two mobile phones at the same time to check a hotel, the difference of 10%.
177	Will you an high order an high high?
178	I think Didi should now be trying its best to deal with the investigation of how to avoid the two monopoly, no edge ball forever
179	No, want to ask, call express and call special express what difference?
184	The next one is Didi!monopolies!
185	And the price would be higher if they were at the same destination and at the same destination,
187	Apple phone also looks different from domestic phones
188	Earlier, it was found that Apple phones and Android phones charge different fees.Originally has been killing the ripe
189	This phenomenon is really too normal, Meituan order food, the price of the same food is the same, but the delivery fee, and the packaging cost is different, Ctrip to go where flying pig, the hotel room type is the same, different mobile phone prices are different, helpless
191	Didi: Understand, all adjusted to the high price of 8 yuan
193	@ Didi Chuxing came out to explain it
195	Yesterday came home from work and said a waist is a little hard, look back to do a whole body massage, and then Taobao recommended to me a nearby whole body massage [crooked mouth]
196	Last night, I went from a hotel near the Temple of Heaven, and found a 120 standard room for one day. As a result, I struggled to make a single exit to immediately refresh it into 160 a day, and I really have your flying pig
197	Yesterday the headlines has a two goods with Ele. me to buy barbecue, the price is the same, with the original price and discount red envelope two kinds of pay??I think he's sick
198	Yesterday to buy a ticket and others have a price difference, can not light out no matter ah
199	Yesterday, I was pleasantly surprised to find that I ordered Meituan takeout for eight yuan more expensive than usual. I directly said goodbye to MeituanBB 1 [goodbye]
200	Yesterday with his elder brothers dinner, he said to drink some wine, but I drove the car, he vowed that he will call me on behalf of driving, but also specially opened the Didi to help me search the price, 55, can accept.Search on your phone before drinking, 58
201	Crime do not investigate the train ticket, plane ticket, must go to the official website, the third-party platform did not guarantee
202	The most important thing is not to kill the mature, but to squeeze the remaining value, Apple mobile phone users are generally richer, more expensive goods, Android generally have no money to use, it is cheaper.Please study what economics is to extract residual value.
203	When the first propaganda to vigorously promote the construction of big data, I thought of this situation, information leakage, data killing, network fraud, information fraud.To vigorously promote big data when relevant technologies and immature laws and regulations are not perfect is more harm than good
205	One of the most outrageous taxi platform is called Xiangdao, 3 kilometers received 40 yuan.
206	The most terrible thing is that I knew he was killing him, and I couldn't do it.My choice is only to buy and not to buy
208	Recently, I have quite like Xinhua News Agency [OK]
209	Best solution: Prevent software companies from accessing user information, except for location functions.User information needs to be passed through the national administrative department, randomly change the user name, and provide disguised information to other software companies (such as the user name to number plus letter combination, or a string of strings). The national administrative depart…
213	Had better have the price network unified price, or it is to carry out a separate department special supervision
216	The most worrying is Jingdong, you open a member to buy everything you are more expensive than others, I compared with two colleagues, 80 percent of they buy things have coupons to get and opened members have no coupons to get, the average I am 30 percent more expensive than them. Does this kill you???
218	Apple can settle its accounts on an Apple account
224	Since changing the Apple computer, Taobao can't find cheap and good-looking things [hot eyes]
225	Senior big data algorithm engineer.40k-50k.What moral what is done [doge]
234	Capital is never a good thing, although it can make the market dynamic, but when the power of capital is strong, they will control the market and start to cut leeks.
237	Prepare two mobile phones
239	Make a million, fine no more than a million or higher if someone will always dry [hot eyes] [hot eyes]
240	Earned hundreds of millions, fine only hundreds of thousands, you punish him hundreds of millions of try, immediately put an end to, not fundamentally solve, such a thing will be less
241	Experts said, I travel are arranged, I don't care about the price, I will be fair, you don't take it seriously
248	Famous hamster reply @ Langfang mental hospital Dr. Gao: ok I take ipad the same account to do a Youku member six yuan 5 take Android five yuan what can be washed consumption Apple smoke 30% has been a pile of video said more than once
257	The platform: clearly said I kill familiar you can put me how drop!Isn't it the penalty? you say the number is.Is this a matter?Anyway, you can inseparable leave our platform.How do you love it? [doge]
258	At noon, I go out to find a restaurant cheaper to eat and exercise
259	Chinese old veterinarian replied @ waiting for snow snow: good, last year I was brush paste, teeth a little uncomfortable mobile phone lock screen when the mirror, and then brush down began to recommend dental hospital [speechless]
260	China needs to regulate the Internet and financial industry
262	No capitalists are allowed in the People's Republic of China!
264	Point out that Meituan takeout, the same store, different mobile phones, different times to see different prices
268	Is it only my attention on the Apple phone screen?[funny]
270	Only the ruthless punishment, it is possible to treat this problem.Found once, fine the net profit of one year
271	As long as I have more small sizes and don't often, big data can't [doge]
275	As long as I don't, they can't kill me, but it's really bad, hoping to work hard and make them once for 10 years.
277	As long as the law increases the punishment, such as shutting down the platform once found.He who punishes one threatens a hundred
282	Can only use a thousand yuan machine of which I was moved to tears, is really a conscience entrepreneur, the people's big data [smile]
283	We can only say that Xinhua News Agency is always fascinated by the people's livelihood
284	Can only say that the fine is too little, enterprises do not feel distressed.The first 50w, the second of the second 50, the third third, push down to see if he dare
285	Can only rely on the Xinhua News Agency, to go to the top
286	Can only blame the punishment intensity is too weak chicken.
287	You can only use a few more APP comparisons
291	Direct suspension for rectification for a month, I see who also dare to kill ripe [yi teeth]
297	Can't you directly pull it into the credit blacklist?Ban its loans and so on, see if he still dare not
301	Direct according to the company market value ratio penalty calculate [hot eyes]
306	Alipay hello bike, my friend and I received a monthly card advertising at the same time, he is 14.5 a month I am 14, his mobile phone is more expensive than me
309	Support more money, who let you worship foreign beauty
311	The best laugh before is not a university announced to enter the school the day after tomorrow, the result of the ticket directly rose 400 [off single doge]
312	Before, my customer said that the order on the APP is cheaper than what I ordered, so I said you would order it yourself, and I really have this price.
313	Before Taobao bought something worth 2,000 +, I saw it at the same link, and found that the price was not directly right, the price directly doubled 4,000 +, and several times again became 2,000 +
315	Before the friend to book the ticket has this situation, originally thought because the friend used more, so the discount is more
317	Anyone remember the previous experiment done by a professor at Fudan University?It seems that they spent tens of thousands of taxi to do, different mobile phones, different accounts of the same distance price gap is not small.And a fine, an enterprise..Forget it, Tencent fined 500 and then still full of money, and even directly and some high schools to pay the fine directly fair and honest do not…
318	Anyone remember the previous experiment done by a professor at Fudan University?It seems that they spent tens of thousands of taxi to do, different mobile phones, different accounts of the same distance price gap is not small.And a fine, an enterprise..Forget it, Tencent fined 500 and then still full of money, and even directly and some high schools to pay the fine directly fair and honest do not…
319	Before the business trip together with colleagues to order takeout, colleagues seldom order takeout 25 minus 15, my 25 minus 10, I quit the login after 25 minus 15, hehe [laugh]
320	Is it not allowed e-commerce to sell vegetables before?Now that what ding dong sell vegetables, my mother on the road riding the car with his mother Wolf saw sheep like want to call me to download, even sell vegetables such vendors of rice bowl they have to grab, really regardless of whether they will go to heaven!Since these dogs started selling vegetables, vegetable prices have been rising much…
323	Is the evidence too easy to find or the lack of legislation and lax law enforcement.Once public interest litigation is open, every platform has to kneel
330	Rectification bai, what is the use of the fine?
331	Rectify the Internet to take small businesses, the real those Internet giants punishment are not painful
333	I really hope Xinhua News Agency can look at the e-commerce platform auction collection, product garbage and other...
334	Some people say that Apple smoke, with you to buy a ticket Apple can also go to the airline smoke ah, Apple itself dare not say oneself so awesome.
336	true.I have also made [laugh cry], buy a ticket tablet price is different from the phone, tablet is a few expensive
337	what a coincidence!I don't have to [laugh and cry] I am not behind The Times![Cbs of joy] [Tears of joy]
338	I'm so sorry, so you found it out.Next time to pay attention to the same price, new users to send coupons, the old users have no coupons.
341	I really hate big data and limit people's minds
342	Really, my friend recently want to buy a plane ticket, and then the friend over 8,000 Apple phone is 1050, my 29 thousand Android phone is 910, has been speechless
343	Really, order takeout with roommates, a dozen fried chicken can be three or five yuan
344	Sincerely hope that the most thorough!serious!heavier punishment!Rectification such kind of enterprise behavior, agree with people please give me a thumbs up
345	Really kill Apple users as a pig?Apple costs tens of dollars more on airline tickets than Android
348	Ticket and hotel bookings this week, both showing temporary price increases at payment [Smile]
350	This kind of thing, should strengthen supervision, if the boss surname can control this kind of thing, that round not to get unscrupulous business to kill
351	At this time, I still can't see the old beauty side of the treatment method and to learn from a bad judgment and bad supervision, then don't want you to change the ability to let the people choose!
352	This situation is almost better than them, and the price is always cheaper....Although some even three no products are not counted
353	This use of big data to kill mature behavior has technical restrictions, it is difficult for consumers to report and collect evidence.Or to the industrial and commercial department to have special people to use the test Pa.
355	This will not hit the pain point that he will not admit the mistake. He will give him the punishment in his name, such as the punishment that can be recorded in the platforms such as Tiancheck, which will affect its credit investigation and make it unable to borrow
356	If this punishment is not integrated, it has no sense. It must punish the premise that every transaction is assumed to be illegal in order to effectively manage the market
363	Will these capitalists discuss the division of the army in the future???!!!
364	The fine is a dime in the bucket, and it follows
365	The capital is becoming more and more unscrupulous
369	These enterprises use the so-called big data, with high-tech irrelevant personnel [hot words series _ you details]
374	And many people know what this can do?Even read your photos to determine that you have software you can not open permission with nausea no have to honestly use there are a few software to read your storage information do not give to disable most of the software can actually read my storage information has no impact on its use can be this real dog
375	What do these app's do?I don't and won't have it in my phone.I want to delete tb, during the activity, the discount price is higher than the usual price, have to spend the thought to compare [abandon]
377	This thing is not what "big data" such advanced things, the software will also get a model is finished, pull what big data ah
378	What is this a big data kill?Android and Apple are the two channels, the channel cost is not the same, merchants can not set their own prices?
379	What is this, I order the same seafood fried rice, the store sells 25, takeaway app on 48 [speechless]
380	That's one reason why I don't use Apple. Apple will smoke it out, and then the big software will think that Apple will charge more money
381	This is the human nature want to use the system to correct human nature has always been a drop in the bucket will only make the expression of human nature more complicated eventually we are very perfect but life experience is more nervous fatigue is contrary to our good wishes to teach the saint to know yourself to see broken human nature beyond human nature this is the real way to solve the prob…
384	Is this a flow-out limit, right?![Hot Words Series _ Protection]
387	Now, can MIUI mess with big data?
389	What does this mean, because the price of the phone is different or because of the software, why the barrage is scolding Apple
390	This kill of cruel ruthless ah, I just searched a thing he pushed to me.You use it on a software for a long time, and it begins to kill it.Big data is very ruthless.And there is software that is cross-platform connection. I searched another software and pushed it to me.
392	This reminds me of the price change of Uber when I was studying abroad. My friend's iPhoneX is $5 more expensive than my iPhone8 call car (the same distance, the same car type).Sure enough, capitalists do the same.
393	This year who use APP, not their own go
394	Let's say so, as long as I have no money, you can't kill me, the price is very expensive, bus, subway, restaurant dinner, cook for myself, the flight I always go to the airline official website to see the price
395	So, bought Ele. me super member, the same thing is several expensive [doge]
398	Such an obvious killing, and also algorithmic evidence?I can't figure it out.Just take a few mobile phones can verify ah.
399	In this way, the code is really y y d s, capital + technology is really invincible [hot eyes]
401	So many days later, the punishment news didn't see even one
402	In the past two years, after seeing the appearance of these platforms, almost no Didi, Meituan or what, is to support the physical industry.
404	One of the lawyers said it very well.This kind of thing should not be consumers to be killed, but after the platform to prove that I did not use big data to kill.As long as this can be implemented, the platform will converge, because its self-certification cost is not low.
405	This kind of software is always getting sick
408	It's not data killing, but the amount of Apple APP transactions that has to be paid to Apple.
409	That's why I unload the hungry Meituan [Hot Eyes]
411	Is this the "big data" [insidious]
413	So, just buy an Android phone??
414	This basically depends on what ordinary people in the country can do, he is so how can you do? Injury or ordinary people finally know why businessmen are cheap, no matter how? Big enterprises on those a few countries no matter the market is so a few have no motivation, look at the big enterprises have investment, basically have something else. I don't know about Tencent everything is engaged in t…
416	It was not reported several years ago, and now it still needs research certification?After so many years, Meituan and Didi Ctrip did not feel it.Every year to report this news, the problem is not solved, relying on the right traffic of the media, and the official media to report the performance, every report is like the government to solve this matter, in fact, who dare to touch this cake ah.
424	Can we manage this one @ Xinhua
425	This month seems to have a provincial exam, when booking the hotel with the same APP booking hotel I search out than his home page provincial test discount activities cheaper [doge] fortunately I do not save the exam, this should also be kill, if the APP know you really take the exam, that is to kill you
426	This sample is simply not enough!Apple is notorious for saying that businesses have a problem?You compare Redmi to Huawei's phone?I price the Redmi p30 and Huawei mate40 anyway!
428	This is really Meituan ordered takeout the same price becomes higher day by day
435	With Apple, no one doesn't use such physical goods and services. It is purely familiar, and the expensive Android phones on the same platform will be more expensive than the cheaper Android
439	The navigation bar of this Android phone, along with central digging holes and microcurved surfaces, is undoubtedly the Samsung s20 series + or u.I know it's because I was just using the Samsung s20. [Laugh and cry]
441	Ele. me is an expert in this area
442	How to say this fine, for big enterprises, the fine is not painful, open for a while to recharge to send things activities may earn back [eat melon]
443	This is a small amount of money to earn back in a day
446	This thing is not qihu rogue software 3721, Ali, Amazon, 360 each inherited a part, now it is everywhere, mmp [insidious]
450	Is this not a subject that some scholars did before, how can it become a Xinhua News Agency reporter?
452	Isn't that capital
458	This is all filmed and requires consumers to Sue the supervision of this...
464	Tut tut buit big data to kill familiar Apple and Android are the same.You can't understand this video.Just the same time of the air ticket but another mobile phone is expensive
466	Long found this problem, go to the same place, Pingguo mobile phone hit Didi more than 20, Android less than 20
467	Long found out, with Meituan to set the guest room.
469	Early tm no didi
470	Praise exploded the Xinhua News Agency cattle b [eat melon] dry his ya
472	In this era of big data, you and I are all streaking people
473	When I often call takeout and taxi, I am always at the highest price among my colleagues, [hot word series _ afraid] I even buy a gift bag at the same price as my brother, is my content chicken rib, his rich.The md, speechless, no love.[tv_ get angry]
476	In a takeout platform, I have repeatedly found that as long as the store has bought, the second time to buy again, the delivery fee is all more expensive than the first time, this is to kill ripe
478	In the eyes of the Internet giant, you are "naked", even you don't know whether you are "naked", information age, play an inappropriate example, if each giant associated with each other, personal information sharing, can make a and you experience little physiological nothing to do with you [cover face] [cover face]
479	At Ele. me ordering, the first next display 20 and then return to the repoint settlement display 18 and then return to the point settlement at the return point settlement, every time...
481	Why is the apple so much in the comment section?You use a more expensive Android phone with big data...And talking about Apple's channel tax, isn't this thing only for virtual items?Have you bought anything collected on Taobao?And Huawei Xiaomi's domestic app stores have channel tax on such virtual items, and Google Steam is as foreign as Apple.
482	Why not say Ctrip, hotel price, members are higher than non-members, outrageous [hot eyes]
484	The larger the capital, the more you need to be regulated
486	Fate should be said: are Tencent department, the current life software is also Ali Tencent two major departments
487	It turns out that big data is used like this
488	Yuaka-12334 Xinhua News Agency dare to say anything, too fierce.
490	Encounter, my classmates and I face to face to open millet mall to buy millet mobile phone, the same thing.Mine is available, and his is sold out.I don't look at the mall, he often tells me about the new millet goods.Unexpectedly, it was also the original is the big data to kill the familiar …………
491	Encounter, Ele. me Meituan now also seems to have
494	Can it show the number of all social platforms?Now, as long as the news of war and conflict or negative is a lot of praise, but it is not realistic to step on it, which does not how to guide minors to form three views?
497	Once again, my classmates and I ordered takeout, I had a discount of a full reduction of 12 yuan, she didn't
502	One more reason not to buy Apple
506	There is a barrage don't say Apple smoke, these software pay is Alipay wechat, but apple store did not draw, just just to Apple users charge more money [spit]
508	Now, Xinhua News Agency has only had a million fans, which is the most outrageous
509	Once the same thing, in Taobao payment without shipping costs Tmall also have to pay extra freight [crack melon seeds]
510	A problem does not need and will not die, direct software off the shelves [OK]
513	What is the use, now is still killing, Meituan ele. me two broken software
517	What is the use, you go the legal way people are not afraid of you, people a big enterprise to see you like watching ants
519	Someone commented that "so don't set a limit, fine based on profit" was deleted, who did it?why?
522	Hot comments were deleted
524	There are two times to buy a ticket to order a second prompt hundreds of expensive, decisively change another APP
525	Some people are like nt, after the appstore payment will be drawn into, similar to the king recharge, the fifth recharge.Physical objects or Meituan these order similar things, through Alipay and WeChat, to their hands, how do you think to smoke?Man apple hands again, how does he smoke?
526	Some price changes are very normal, because and the number of remaining tickets decided, may add some other factors, this price floating within the allowable range.But this is different, as if several people take the same car at the same time and place, each with different ticket prices
527	Some bullet screen is really disgusting (I directly report anyway) what I buy mobile phone need you to tube [speechless] [speechless]
529	There are bullet screen said that using Android is the poor, I directly reported [hot eyes]
531	Once I stayed in a hotel.The first day is Saturday in Meituan 177, and the next day want to stay, MeituanBB 1220 went to the front desk to ask 180 [OK] [OK] [OK] [OK]
532	Once with Didi on WeChat, I had previously certified it as a student and said that a discount would be cheaper.That time, because I had not decided not to go there, I kept withdrawing from the same place to reenter and exit, watching the price of two pieces and three pieces go up.During this time, I have been in situ, the destination has not changed, just back into a few times on the price rose!I…
533	Once to buy a plane ticket, a more expensive, before and after a few minutes up hundreds of dollars, originally I was also killed familiar
534	Once guangfa credit card App point installment, also divided into 3 issues, the same day each time into the installment fee is not the same, the maximum difference to the difference of dozens of yuan per month.Thought that their eyes are wrong, that night to operate more than a dozen times of the screenshot comparison, found that no handling fee is the same.Said to colleagues did not respond, als…
540	Especially in the Huawei mobile phone users, the IQ identification is completed!
542	Grab their data with a bag [hot eyes]
543	People with apples don't care about the money.Must be a little higher to reflect the values and taste ah.
544	It's definitely a little more expensive, so people can care about that money [doge] [doge] [doge]
545	Using an iPhone is originally a person, expensive point is very normal, noble experience
550	It is very difficult to determine whether a company has a dominant position, but actually find a few people to ask
551	Didi is more expensive than your colleagues at the same time 15
552	Can't afford Apple, those who order more than 10 yuan don't buy [doge]
554	We will always support the open and transparent service of the people wholeheartedly, 12306!
555	The app store puts money on the shelves. Android gets user privacy
558	A regulator should be established to do everything across these networks
559	Should constitute consumer fraud false one compensate ten.The consumer will report back to the enterprise.Enterprises must compensate
560	Should fine 500,000!!
561	Should be fined by percentage [funny]
565	Because the penalty is not serious rights protection cost is low
570	Italian food delivery platforms have just been fined 5 billion yuan, but no more
572	Yi white black reply @i860: the truth is this truth, but the personal feeling inside the main problem is no tools, because assembled this piece, he has also contacted before, have some experience, and feel that he did not do anything to the computer, charge, forty for a student is not less [laugh and cry]
575	In the past, I used to often open hotels due to work reasons. Later, my college classmates came to me from other places to play. We saw the hotel in Meituan. my average price was 30-50 more expensive than him, which I felt outrageous
576	In the past, people used to be monopoly to accept different pricing, but now only big data can customize different exploitation for everyone
577	Before very trust flying pig, a student, not how often buy air tickets, air tickets are bought on the flying pig, until once, found that the official website price is cheaper than flying pig!I then only bought it on the airline's official website!
578	In the past, when I booked a hotel with my friends in Meituan, without any discount, the price of each hotel was ten or 20 yuan cheaper than me, which was outrageous
579	I thought Xinhua News Agency was very powerful, since you carelessly removed the top of the Yangguan forest farm case, exposed the essence of the strong in the dry.
584	Later fines or based on the proportion of profit and the scale of the punishment, let them feel painful
585	Mobile mobile phone package is like this, I basically 13 years of network age, people new network within a year of benefits.grass
586	Is the mobile price discrimination counted [smile]
589	Eden Hope Paradise, for example, Meituan will increase delivery fees in bad weather, which is very clear (I basically order takeout every day)
591	I always find big data disgusting
592	Has been under the banner of big data openly that our personal data sales to obtain benefits.It doesn't seem that one of our consumers really enjoy the convenience of big data, but capitalists really make it
593	Has been killed cooked, recently jd beer discount in the bar good price no goods, see twice every day has not covered, today the mobile phone sent a 30 coupons, directly into the two big sticks, estimated east elder brother every day to see me only see not to buy all bored
597	Some people's brain is not confused, you with him said the price is not the same he said the apple has a share must be expensive ah!You're talking about two apples, and it's just two dollars.[Hot eyes] [Hot eyes] [Hot eyes]
598	A bowl of Hu spicy soup and four big steamed stuffed bun, go to the store 7 pieces, online order 13. A few years ago, Xi'an played ten days, near the Yanta scenic spot, a live platinum member, the first three days 330 a night, and then run 380 but the price is lower.So you have to shop around all over [eat melon]
599	A group of people said that the apple had smoked it.Apple only smoke into virtual goods, providing physical services / goods is not drawn into [maggot sound niang _ speechless] understand clearly say ah
600	A year ago, I ordered an ele. me 20, the same store Meituan 22, now I use the same super foodie card after 5 yuan 25, Meituan nothing 23, is always the same store, I often go to the store to eat, the store did not raise the price, a package is only 16. Recently, every time I used Ele. me, he told me 9 quick money, and I thought he was scolding me
601	One dollar may not be much in our eyes, but the number multiplied 100 million?Don't forget that this dollar is not just from us and hundreds of billions of other people, then you think about it will be too much?Is a dollar on one a huge profit?Alas, those who were fooled by the capital of the lame people [speechless]
603	Once it is recommended to directly punish the enterprise to bankruptcy [angry]
604	Level 1 price discrimination
605	One is that no professional department found and governance of another illegal edge ball and even the cost of crime is too low after the punishment or make money that there is nothing to be afraid of
608	A price from high to the end, one from low to high, can be the same?
610	One APP search, multiple APP tips [surprise]
612	Be sure to blow these capital hard
613	A certain proportion of the revenue of the business to fine [crack melon seeds]
615	Once there is a kill, a direct fine to bankruptcy.The whistleblower has a reward.Play to play or ancient set, when out of a Han Wudi.
616	Time and time again, but the punishment ah...
617	One warning, two fines, three bans, you see there are kill?Fa big things for years!
619	Punishment is hundreds of thousands at a time, but they may have benefited tens of millions, hundreds of millions, where will they be afraid because of this warning?
621	A check out directly forced down the shelves, not rectification can not be online, rectification after the online to kill cooked, directly banned, otherwise the fine is gross ah, kill a few cooked and earn back
622	Generally do not eat takeout, air tickets booked on the official website of the airline, train ticket 12306 [crack melon seeds]
623	One million fans posted only 1,000 comments for two hours? The courage is also too fat!
624	Ye Yiren replied @ Nanchuan drunk red: these two will be round to send your member vouchers...But if you keep using a platform, there is nothing
626	Industry: Domestic mobile phone manufacturers are actually much higher than ios
630	If Didi receives 20% of the driver directly, the drivers would rather stay at home than run out, counting Apple's extra 20%.I used a driver with ride-hailing software, and they said that it was they causing us to have a market
632	Think about what Meituan makes money, when it controls data, it can do whatever it wants; not everyone is killed, but as long as it manipulate data under huge consumer groups. In short, big data gives me a dollar possible, and technology benefits humanity.
633	To contrast with platforms, Apple has more platforms
635	If you want to punish, directly open the report platform at the same time free, and then the whole people compare the price
636	To pay Apple tax ah, he this software inside Apple pay to pay Apple, how can be considered kill, should blame Apple overlord clause, of course I don't have an Apple phone, don't spray me
638	If it weren't for the sleep of 12 people in college, I didn't know that my Meituan takeout price was different from the roommate price [hot eyes]
639	Or whether the Apple system deducted the money, or whether the software itself killed [doge]
640	To delete video [doge]
641	And your so-called VIP one-to-one service, it is less than 1% of the people enjoy the service, at least the rich people around me is still Taobao shopping, physical store shopping, only furniture is the customized docking with manufacturers
642	Yes, a lot of times to buy things offline and online, the final price depends on the buyer and seller bargaining decision, there is a difference
651	Snow Ling BenLing investigation of an enterprise tax increase 10% can not
654	The school asked a meeting that children should be grateful, in the end to sell products.
655	To learn from class-action litigation in the United States, many law firms Sue on behalf of a large number of users. Once the lawsuit wins, the enterprise needs to pay sky-high compensation to a large number of users, and the participating lawyers can be paid high remuneration proportionately, which will stimulate the enthusiasm of the lawyer group and thus play an effective supervision role in t…
658	Learning big data is really afraid and disgusting to do this kind of thing...
659	As long as you still use WeChat and Alipay to pay, it is never possible to monitor the big data
661	How terrible the rectification of big data is....
663	If, you see, someone can turn the guns that should be at the capitalists at the regulators.What a diversion.
664	Brothers rushed with the Xinhua News Agency!
667	Fortunately, I sold my iPhone for vivo [crack melon seeds]
668	Fortunately, Xinhua, otherwise the video would have to disappear, right?
670	News without Xinhua Agency I don't read [doge]
673	The New Era Capitalist [doge]
676	Xinhua News Agency finally said this matter, I think the fine may not necessarily play a blow. If you find such a situation suggested step stop app, stop you for days, weeks or even months, naturally other better app will come out
711	Xinhua News Agency pays more attention to people's livelihood issues than CCTV
735	Apple tax a year profit is higher than any other mobile phone manufacturer in China [eat melon]
738	Ctrip buys a ticket
739	Ctrip to buy the same flight, my classmate and I are more expensive than his mother's mobile phone on the hundreds of pieces [laugh and cry], outrageous, we are Android
741	Ctrip The same flight is more expensive than Qunar, which can really cost dozens of yuan. Then Qunar has different mobile phones and different user fees are different as real and reliable
747	Xiaoyu ゛ replied @ Xue Ling Ben Ling: You can be fine by percentage
748	Do you have anything you want to say about Meituan
750	Small ten apple delivery is the same, looking at the freight went up a yuan, but also said that the delivery address has changed, in fact, has not changed, do not know what to go on
751	Mi diaosi machine, Meituan every day god coupons, every day full 45 reduced 3 pairs, or 2 yuan expansion to 3 yuan [smile] [smile] [smile] [smile]
755	Remembering a taxi, Didi driver picked up when me, but also and peers particularly emphasized a sentence, received an Apple [tv_ angry]
756	Reminds of a joke: someone play a taxi, a driver chat, the driver said, we do drops, is fighting with big data, dry a few days, rest a few days, so the system think you don't want to do, give you some way and high good single, otherwise you do ten hours a day, are some remote list, effort is hard, but also can't earn money
757	I have seen Didi Taxi in the same distance, from 12 to 20 fast 30 have [out of mind] sometimes I really dare to take a taxi, too expensive
762	Now know what cell phone to buy [doge]
763	Now these shopping websites, the two account prices are different, what is the way
764	Now less and less online.... even delivery is giving up
765	Now Tencent, Ali's psychology is very understandable.Just thinking of the policy, the law has not been perfect.A little more money is a bit
766	Now the routine is really much, the punishment to add money ah [funny]
767	Now it is a random coupon, I bought Taobao 88 member Tmall supermarket can never get a full 110 minus 20 coupon, my mother can easily get it.
769	Now Pinduoduo Taobao Jingdong and TikTok and even B station users browsing information are shared on these platforms, this you have no objection, right?When you want to buy something, these platforms can target ads, and you don't browse or search for a product on that platform, but it can target ads. Why do you think that?This is too obvious, as long as you search for a product on an Internet pla…
770	Now I buy all the air tickets in the air travel horizontal to buy
771	Now even Meituan is preferred, more than ten yuan of things, my mobile phone and my parents' mobile phone show a few cents away, some and even dozens of big goods.
773	Now the role of the law is too much limited, many laws cannot really regulate human behavior, some people know that the law forbids some behavior but still have to do it, holding a lucky psychology, do everything possible to avoid the law rather than obey the law, let the law become a belief in this road is still far away
774	Now make random reduction, killing is also improving, whether the fine or warning, can not change the status quo
777	Now the big data kill ripe is switched to red envelopes
778	Now I have to take a taxi with Didi compared with my daughter-in-law with no discount, my Android is much more expensive
779	Now it is not a price change, now it has changed to a random vertical reduction, you can't take him...
780	Now it is not a price change, now it has changed to a random vertical reduction, you can't take him...
785	Late summer and autumn cool, meet you suggest the map software taxi
786	Fine a billion next time
788	Like the heavy rain of the warm official should kill or will kill?????♀?Two days ago, I bought a plane ticket on the official app of China Eastern Airlines, and I found that the same flight was 50 yuan more expensive than their official website [hot word series _ harm]
790	There are no big coupons without ordering takeaway food [crack melon seeds]
791	We hope that the relevant departments will name and criticize the rectification
795	Hope to strengthen regulation [speechless]
797	Wuhan Happy Valley to Xunli Gate, my mobile phone taxi price is 69, my friend 89, this is not killing ripe, this is simply killing a pig.
798	Wu Xianping carefully read the news, and today held a meeting to regulate the platform economy
800	In fact, each major civil aviation has its own website, I buy air tickets will generally go to those places to buy...
801	erless-crazy god reply @ this is the second garden _i i: so and the player fart relationship is not, so many people blow and black is full of support or the manufacturer bought the spot.And what is more expensive for Apple phones is true and not invisible
803	What is valuable is data, people are just accessories
811	Slots, yesterday roommate just met, sitting ground starting price, decisive not to buy.
812	I can't sit on a plane, with a flip machine, is it not easy to be killed
813	I took a taxi for 17 yuan yesterday morning, and taking a taxi back in the afternoon became 24 yuan...
814	I recently Meituan daily god coupons every day is full of 80-1 I fuck laugh dead ele. me at least give a 4 5 meaning Meituan even have no meaning
815	Since I bought the Apple 12PM, I have always pushed pinduoduo 9 yuan 9 of the Apple 12 and some related videos from Station B [doubt]
816	I have cancelled Ctrip, Meituan and other accounts for three or four years, Pinduoduo almost not used, because they have too many marketing routines, we think the bargain and withdrawal, is actually exploring your relationship, we think the discount, actually based on the algorithm hidden rules and not intended to give us; we think we can get fertilizer in seconds, is actually recording our point…
817	I go straight to 12306 [Face cover]
819	I support the iPhone, add money!Because they buy more money for an iPhone
820	I had this situation on where I went, comparing the price of my phone, but then chose the cheapest one.
821	I used Alipay to charge my phone fee and log in with my card 1, showing that the 20 yuan phone fee was out of stock, and there is no discount for more than 20 yuan.Log in with card 2,20 can recharge.And there is a discount of more than 20 yuan
822	I used to fly pig to buy tickets is like this, I saw did not buy, after a while and look, show that the number of votes is tight, after a few hours to see, the number of votes is sufficient.
824	I used to ride, really the same place, the number of times, the taxi to spend a few cents more.Is this a killing or ripe [laugh and cry]
825	I have met "big data killing ripe" in the Chinese practice book [hot eyes]
826	I buy train ticket hard sleeper show no ticket need to grab tickets under the same case Alipay can buy a ticket someone has this kind of situation
827	Where do I go to buy a high-speed rail ticket, in the past the student price 71, once buy is 94.5, said the discount ticket can not use the student discount, the key I looked for a long day did not see where the discount, before did not buy the student ticket original price 94.5, finally 12306 to buy, 71 yuan
828	I have been customer service in Meituan, and the first lesson of our training is not to admit the big data behavior on the platform
829	I ordered it with pc on the airline website.Cheap than all mobile phone APP
830	I have also met it in the AutoNavi map!The price looks like one after another for a while!I made a room more and more expensive
831	I booked a hotel in flying pig for 3 days, and then use flying pig booked that one, the price doubled, Ctrip has not booked, is the original price
832	I have met, Taobao to buy a clothing, three Taobao number highest and lowest price can be half a clothing money
833	I have met Meituan delivery fees for more expensive members
834	I have an old phone old phone whether takeout or other online shopping is cheaper than the new phone
835	Once I ordered Meituan and used the coupon, the first time was 4 yuan, the second time was 10 yuan, and 8 yuan for the third time. I spent 10 minutes to brush the price of the first time, and finally successfully ate four yuan meal [eat melon]
836	I have three taobao accounts, in February this year the home electric pressure pot broken, picked half a day to a Supor, three taobao accounts in Supor kitchen appliances flagship store see the same model of price, but can get coupon lines, I trading the highest taobao account is the most expensive, the lowest cheapest, finally of course with the cheapest account of the order.
838	I have a question, if all Apple systems have the same price and all Android systems have the same price, can it only calculate the different prices of different platforms, which is the pricing problem of platforms. Should the same category of goods have different prices among people with different consumption habits?
839	I have a ticket, Guangzhou to Hangzhou, began to buy 9.10 points, buy the wrong change to 11.10, more than two hundred, after called me that the plane ticket is not, then I said to 12.10, he said that more expensive, more five hundred pieces, promised, I worried, I thought is on the basis of more than seven hundred, after all the change failed, the result is seven hundred plus two hundred plus fi…
840	I went to the store to go at noon to eat and not often order takeout. Every day, I opened a red envelope of 7 yuan without threshold, then I commonly used and became 5 yuan, and then changed 3 yuan, 25 yuan, less and less
843	I use my wife's mobile Taobao to search for goods are much cheaper than my own [laugh and cry]
844	I use my iPhone to be higher than you, buy things in not expensive point not worthy of my identity [melon seeds] [melon seeds] [melon seeds]
845	I use Ele. me Meituan, a app for a long time, I will kill it.Didi is also the [OK]
846	I use Didi as a taxi to and from work, and the price is growing steadily.Ele. me platform red envelopes also kill ripe, often order takeaway red envelopes are small.Meituan has already killed me away, and has completely given up...
847	I paid more than 120 yuan with Didi Taxi, and the driver showed me only for 100 yuan
849	I used to say that there are people in the maintenance of killing ripe, it is really drunk.I opened a member, and the result of my price was higher than those who did not open a member, my friend is beside him, he did not open a member was lower than my price.[Be hard on the eyes]
850	I used to give me a discount for a few years, until I heard that a friend member 3 pieces [smile], cruel broke a month it still reported to me 15 to open, I broke another month for it.It gave me three pieces [eat melon]
851	I already don't have to order takeout on my mobile phone to buy clothes and train tickets anymore
852	I have been used to killing me by Meituan, and I plan to change ele. me to kill me [OK]
853	Sometimes the price of a Taobao 88 member is more expensive than the ordinary number, so I sometimes have to use my parents' account to buy things
854	I usually go on Ctrip optimistic about air tickets and hotels, and then directly to the airline official website and hotel official website to buy.Ired is a little bored, I am not bad these dozens of hundreds, but I just don't want these grandchildren to make black money.If you provide a good service, or let me reward you, I will like to, I'll give you.But if you want to play Yin with me, then I'…
855	I also tried. I often went to that takeaway myself and used my mother's phone to order it about 4.5 yuan cheaper. I didn't understand what it was, but today I realized it was [smile]
856	What do I want this hair to have a reply @Vone a stupid fish: do not eat takeaway, the hotel to the local set, air ticket airport booking, 90 after the lonely old man record [crack melon seeds] [crack melon seeds] [crack melon seeds]
858	I want to shout out loudly!!the Xinhua News Agency nb!!
860	I thought that this video is very good, too. The recommended video below has a lot of views, and by comparison, this video is very low.[think deeply]
862	I wonder why the official numbers will not comment?@ Tencent @ Meituan @ Didi @ Alibaba @ Ele. me @ Flying Pig
864	I would like to ask you if you have swept the hello bike back the car clearly other people's mobile phone display can stop results their mobile phone display can not stop positioning always float their own it run [cover the face] (my apple phone 2 problems my classmate Android phone is ok) [smile]
865	I want to ask, what exactly does killing cooked means? Is this the price difference on different platforms?
866	I would say that 99.99% of the software is killing, and the remaining 0.01% are working on killing algorithms.
867	I think of how I have seen a story before, a university query students meal card consumption, to each month in the canteen to eat more than 25 days of students, less than 8 yuan per meal consumption issued meal card subsidies, not only to help students but also to maintain the face of students.
868	I remembered that before I booked a room, my room price is more than 700, but another person is only more than 200, I thought I was in bad luck, and now I think it turned out to be so
870	I now buy slowly and what is worth buying these two app kill, not the lowest price do not buy.I'm afraid that this kind of app is compatible with e-commerce... [stay]
871	I now generally use software do not log in, no account situation to see, optimistic to buy, buy to return.[doge]
872	I now Meituan to buy a red envelope on 8 fast money before 5 yuan
874	Why do I think Meituan members don't save much money?!
877	I spit up, I used Apple 12, my friend is Huawei, he took a taxi 8 yuan, I took a taxi 9.5
878	My same mobile phone two different Taobao number on the same commodity price are different
879	My colleague Meituan's Meituan and I point the same inexplicable expensive, ok, originally so, I did not expect
880	I book hotel 182 through the platform that the company can reimburdirectly, and other channels and direct booking to the hotel is 149. I fed back and replied to my phone call that the channel is cooperated with the company and can be directly reimbursed, not to compare with other platform channels
881	I use drops every day, every take a taxi 5km, the price is really rising from I used after a period of time, from about 6,7 yuan to 8,9 yuan more than nearly 10 yuan, I also go back to buy coupons can only pressure to more than 8 yuan, show I half a year to save nearly 400, but the fare than I first started really rose a lot of [cover face] [cover face]
882	I buy things on Taobao than friends, each time is a few to a dozen yuan
883	I his mother let Ctrip kill miserably, has uninstalled, gather together not face simply
884	I said how the ticket about the higher, wc
885	Let I say, why do the capitalists think they can blackmail the people against the government?Unfortunately, enterprises and companies with a bad record, even if they are directly split and sold by the government, a lot of people will take over.Why do you feel that you can blackmail the people against the government?At this point, I absolutely support the government and the government; it will not…
886	I said takeout is getting more and more expensive
887	My uncle is the boss and the place with the distance of 50 to 70, I put into the society with the local lowest 18 yuan the highest peak 30 yuan if the taxi may be as long as 13 yuan... [laugh cry] [laugh cry] [laugh cry]
888	The mantis shrimp on my mobile phone has recommended to me the game of the Three Kingdoms Kill all day long, but I have never played the Three Kingdoms Kill on this mobile phone, how does it know
889	My roommate bought a snack rack last week, but I never searched it. When I went to the home page of Taobao last night, I pushed me a snack rack [with my face cover]. I also joked with my roommate about how big data is really nb
890	My roommate orders takeout at a different price, and he issues coupons from time to time. I seldom order takeout, so the coupons are very many
891	I came from the Didi Lucky Draw event [doge]
892	When I use the Taobao money-saving card, I have been worried about whether the price of the goods I saw after using it will change.
893	After my previous owner closed, I sold the registered APP students to similar companies
894	Last time I bought socks on Taobao, I a female classmate helped me search, she found a 19 yuan 95 double, think it was good, share with me, and then I opened this link..The same style of the same shop, my side show to sell more than 30!It's so bad
895	I go to Taobao Jingdong Pinduoduo to check one item, and then quit the software, and other software covers will launch the things I have checked. Why is this?
896	I ordered takeout the day before yesterday, settlement of 21 when I use a 5 red envelope, and then I found that the member can change the store 8 red envelopes, I opened, the result settlement with 8 red envelopes but 23 really disgusting me, spent money also become expensive [2233 niang _ soul]
897	I saw a product in a treasure in the early morning, I was still 171 pieces, 8 or 9 during the day into 181 pieces [hot eyes]
899	My friend takes about 1,000 trips to buy train tickets, and my mobile phone shows 400 or more than 400
900	Can I report any information about Meituan and Ele. me!
903	We ordinary people have already certified the different Meituan price for people who are different from the same hotel
907	I didn't order food for a week, and then sent me 60-8 god coupons for several days. Before, I had up to 4 or 2 coupons a day
908	I Meituan takeout is killed cooked, order every day
909	I Meituan in the same store has been maintaining consumption, the more expensive I do not know if this is the reason [laugh and cry]
910	Meituan and my colleagues ordered the same takeaway thing. He was 7 yuan cheaper than me, and both of them used a 5 yuan red envelope.I gave feedback to the store directly for several hours before the store said that they had given feedback to Meituan [smile]
911	I haven't met, because I am a little more expensive, each of several APP comparisons [doge] [doge] [doge]
913	I sold the previous mi 9se for an Apple 8 and I feel that taking a taxi is more expensive!It was true!
914	I bought the same product, and arrived the second time, it was much less than the first time. The feedback to the customer service family said it was impossible, took photos to see also refute me, I directly reviewed this store
916	I have to use my parents to get my mobile phone to buy air tickets. If I usually don't check the records, it will be cheaper.
917	I buy train tickets on the official railway 12306 APP, but the air tickets can generally only be Meituan and wechat or something, so I want to ask if there is such an official integrated airline ticket APP....
918	I bought the Qingdao Airlines plane ticket, and then postponed the school five days before the school starts, I can only change or change the plane ticket.For less than 3 days, a 70% payment is required.Amount, want to call the airline customer service and ask if you can apply for free refund.It turned out to be impossible to fight the game [hug]
919	I buy tickets and what are in the official WeChat official account to buy, so there should not kill familiar
920	I cost more than 100 yuan for a cpu iPhone, gan!
921	My wife bought an air ticket, her air ticket shows more than 800, my mobile phone shows more than 600, absolutely real, two days ago, are Android machine, the same platform, my wife often goes on business trips.
923	I will come to me: @ Tencent @ Alibaba @ City Yilong @ Jingdong @ Didi @ Meituan.Come out and squeak
927	I think a big part of that is Apple's extra draw, which makes consumers pay [wonderful] If compared, compare the difference between Huawei high end and Apple and low end Android
928	I think there is no need to fine. Later, the software for one month. mobile phones that have downloaded the software are banned from trading through technical means, which can hit the pain point
931	Do I just think the reporter doesn't have a mobile phone?Don't report earlier
932	I want to divide this code, make some money has become the knife in the hands of capital, return the original intention...
934	I looked at the thing in my shopping cart every day, he changed at 40 yuan / 58 yuan, he changed every day. [doge] when I bought it at 40, I don't know how many people bought it at 58
935	I said to order takeout, yesterday's fried rice noodles for 15 pieces, today suddenly became 16.5 [doge]
936	I just make Meituan takeout.A customer contacted me today who paid 22, the order showed the customer paid 18 and at the final merchant income 12 [doge] and didn't want to say anything
937	I am doing advertising, Google has a variety of background accurate data for you to choose to put, and edm remarketing, as long as it is a network company, the same at home and abroad, there is no security said
939	I will remember the 73 tickets for the buffet in Meituan. I thought it was time to go to the store. When I queued to the store, only 65 [hot eyes] did I total this thing discount to the legs [doge]
940	I remember I bought things on Taobao, gave my husband a link to ask him to help me buy, he bought a piece more expensive than I buy [hot eyes]
941	I found that I liked Xinhua News Agency more and more
943	I Jingdong to buy cotton tires, pay 400 yuan and then go to see the price of 199, yesterday I bought a pair of 739 shoes, after get 349 yuan,.
945	I suggest banning all businesses from using big data, which does more harm than good to the people. Once found, they were directly fined 20 million yuan and closed for a month
947	I remember a video about COVID-19 or a part of people abroad read the news that some people know that the harm of COVID-19 is highly contagious to the same software they use and they are neighbors [insidious]
948	I remember not only kill familiar, but also read the mobile phone model, judge the price, give the corresponding price, where I don't remember [soul-of-body]
949	I changed my new phone and left my old phone, the old phone was used to call for takeout, the new phone was used to play games and watch videos and something.
952	My colleague and I have a mobile phone, he is an old phone, only half the price of my phone. We call a car at the same time. His car is 2 to 3 yuan or even 4 to 5 yuan cheaper than me
953	My roommate and I took a taxi to the railway station, and his phone was different from Didi in my phone
954	My friend and I are apple mobile phone I am ipx she is ip12, a few days ago went to see the movie, I check the ticket price 32, her ticket price is 19.9, are on the small program, give me speechless, finally bought the movie ticket with her mobile phone
956	My classmate and I ordered a shop, he freight 2.5 I am 4.5. Just because I am a member, did I use the coupon?But my coupons are also paid for ah!How much you can cut a membership you mark.Six yuan coupon can only be reduced by 3 yuan in other places, in order to let more people buy members is really what means can be used.What I use is pay treasure Ele. me, Nanjing Ming Palace Museum there point.
957	My colleague and I searched the same mobile phone case on Taobao, he searched out more than 100, what I searched out is within 30, this is not kill
958	My friend and I hit two cars at the same destination, because I took a taxi more, the price is 6 yuan more expensive than her.The distance of only 3-4 kilometers, the average is more than 1.5-2 yuan per kilometer
962	I also know that the ride-hailing app will deliberately charge more money to 50% of the actual amount, even if the evidence is solid, it will only be returned more part.
963	I also wonder, I order takeout yesterday, my classmate took his mobile phone (android) to him point this: bag 4.7 yuan, I agreed at a glance, I (apple) in the same store is: bag 5 yuan [smile] I leng, and then boils down to maybe I see the serial [smile] think today feel tm outrageous
965	Where I work, there are all kinds of mobile phones at home and abroad. My colleagues and I have tried to use different mobile phones to see different goods or services for the same person on the same APP for many times, but I can't see their rules and don't understand how to calculate them
966	I talked to my friend that I would buy a shoe, but I recommended it on Taobao. At first, I thought I had luck
967	Every time my sister and I order takeout, the price is different from the delivery fee. Every time, she is about a few yuan, or more than a dozen yuan
968	When several of my classmates and I went out to take a taxi with Baidu Map, they were all open to see who had the lowest offer, a Redmi K20, a Mi 9, and a Meizu 16sPro. Sometimes, sometimes in the case that there is a coupon, the price will be significantly different
969	My roommate and I ordered the same takeaway in the same dormitory, and I am 8 yuan more than him [doge]
970	I just sent a dog east to kill the member's comment was deleted, one by one to find all did not find, come ah, delete ah again ah!!!
971	I don't think I can use JD, because the price in JD has been jumping repeatedly [out-of-body] [doge]
972	I feel that Meituan is to kill you a few yuan today kill him a few yuan tomorrow kill quickly accumulated wealth my takeaway fee is very strange sometimes not money sometimes a few cents sometimes 5~ 6 yuan people see is not much but he killed tens of millions of people a day not more than 100 million?
973	I feel!I brush Ctrip a few more times, the air ticket becomes expensive!
974	I found that joining the cart morning takeaway 21.5 and 23.5 p. m. And my delivery fee is 3 yuan, other people's is 2.5 yuan.... this kind of price increase, let me spend 200 more catering expenses every month
975	When I was hungry. me, I was killed. I was 3 yuan more expensive than him
976	I Ele. me members opened the automatic renewal, usually point more and then found that an additional coupon is expensive [dislike]
977	I am hungry. me order takeout always have red envelopes, my wife has not, order the same thing oh, my wife is Apple, I am Huawei
978	I all use the official software of Air China Southern Airlines, it will kill me, I can't be [hot eyes] [hot eyes] [hot eyes]
979	Do I compare several platforms to buy them??Especially for the exam accommodation, ordinary accommodation a night in the same place platform difference is about 100
980	I ordered takeout and only ordered celery dumplings from the same dumpling restaurant. The price given by Meituan was often changed, ranging from 19 yuan to 22 yuan
981	My brother bought a birthday gift for his classmate on Taobao. He used his mobile phone to search for the price and asked me to buy it for him.I search, the same shop, my price is 10 yuan more expensive than him [spit] [spit] capitalist ugly face
982	I Didi taxi, the same distance to go when 9 yuan back changed 19 yuan [Yi teeth]
986	My run kart, I go online every day to take a first win offline, now the diamond, winning rate and ranking can look good, my object to play every day, much more powerful than me, but the winning rate and ranking are not as good as me.
987	My Meituan members are a few days later to buy will be cheap, and add a 50% discount, in fact, 50% discount is the earliest is 50% discount at first glance, in fact, is the price increase [doge]
988	My Harrow bike membership is more expensive than my sister, and she also has 2 yuan of BOC payment a month. I just don't have this option..
991	I just finished calling the phone, and Didi knew where I was going.Just outrageous
994	I do not have this problem. All the things bought on Tmall are not more than 1000 yuan, which is basically 618 Double 11 to spend some money, usually basically a few yuan [OK]
995	I was killed once by Ctrip, and the ticket was increased by 50 yuan.Uninstall Ctrip from now on.
996	I was killed by Meituan cooked takeout members more expensive than others
997	I was killed once, although only one yuan, in January 19, I holiday home, drops in my university city made me a bicycle order, a dollar, because I went home at that time, very clear not used bicycle, drops customer service said I gave others, I repeatedly confirmed no, drops said willing to give me this one yuan order free of charge!It is very funny, for me to fabricate the order was found by me,…
998	My father ordered takeout every day in Meituan that day, was slaughtered every day [snow future _ tears eyes] [snow future _ tears eyes] [snow future _ tear eyes]
1001	I iqoo pro my colleague iphone11promax took a taxi from the company to the high-speed railway station at the same time. I 17 he 21 is really killed
1003	The question is who has the data that consumers generate.
1004	The problem is raised, there is a solution, but no one cares how.I Huawei mate40pro AutoNavi taxi, each option is 1-2 yuan more expensive than my Honor V20, and the option range is about 10 yuan more.Who is in charge?No one cares about this [lost] [lost] [lost]
1005	The problem is that hundreds of thousands of people can be punished?
1007	Even if the problem comes to light, it is very difficult to solve.Because the law already allows the same product to be sold at different prices.You go to buy food is the most classic, the old man and the old woman to buy food can always buy the best price, and a young man to buy food, because he does not care about it, will always be a few cents expensive.(Principles of price discrimination from…
1008	The question is not a matter of fines. Is there anyone really in charge and dare to fight against this situation
1010	@ Weiimiao: Tell a joke, Didi customer service later called and asked me why I didn't use Didi [doge]
1014	Why at this time only a fine, no confiscation of illegal gains [Frost leaf-doubt] [Frost leaf-doubt] [Frost leaf-doubt]
1015	Why look at the algorithm, two mobile phones to take out is that there is a price discrimination, this should not be the platform self-certification?
1018	Why has it not yet been punished [speechless]
1019	Why do not want consumers to protect their rights, this unreasonable situation obviously exists, can the government hit down?Can't there be any rules?
1025	Xi: This kind of thing is too disgusting, play people as a fool.I won't touch the drops again except for special circumstances.
1027	Vipshop is typical, my mother's top member is higher than the average member.
1033	Microscience, price discrimination greatly increases the producer surplus,
1036	The network develops too fast and the necessary regulation and even legislation should be done
1039	Vulnerable capitalist
1041	I don't understand what to condemn.Do we have the seller to promise never to give anyone a price below you?[awkward]
1042	I took a taxi for 19, and Didi showed on my mobile phone that I paid for 17.3
1043	Takeout software is the most serious, and Jingdong I have encountered the same product, the same amount as I can discount (members are the same), and then I called Jingdong, and then gave me Beijing beans [stay]
1044	The same is true for food delivery platforms
1046	Wow, no wonder the salary for big data is so high, it must be high
1047	Wow...Play a lot of cars a year to give up on Apple decisively.There was no other way to fight against it for half a long day.Unless all * * comes together
1048	The Internet tickets for recommended plane tickets are operated by state-owned enterprises, and then the airlines report the price every day, and carry out a price publicity table. The consumers can check at any time, when the coupons are full, they clearly indicate the original price and the preferential price,
1049	Promote search kill ripe blacklist, from the perspective of consumers to do not use, natural ticketing software will be eventually eliminated
1051	Under the same kind of software of three, buy goods all know to shop around, which is cheap to use that.
1052	Search for the same product at the same time, the price of "regular customers" is high, and will also push false information such as inventory shortage and products will be sold out.Xinhua News Agency reporter found that after the release of the anti-monopoly guidelines on the platform economy, some Internet platforms "kill familiar" do not change, and the routine is deeper.Have you ever been "ki…
1055	I booked the same hotel without 320 in the same hotel. My colleague and almost book a room with me, including 280 earlier.
1056	The same dormitory, the same takeaway, the price of three people respectively is 9.88,10.88,11.88
1057	For the same two Android phones, my friend and different
1058	I used to ride @ Didi to above 20 yesterday someone found me to carpool her Android phone taxi only 13.12??
1059	The same place at the same time to take a taxi Apple is 13 yuan Android is 7 yuan if there is no two mobile phones to do the comparison will never understand
1060	Peer regulation is a joke: as long as the government regulation is not in place, all the enterprises in the whole market will work together to do the common people.Hangzhou that think tank alliance is not a typical example of a big ghost belt with small demons making waves?
1062	Hotels booked by the same city network!Different mobile phones show different prices!
1063	Buying video members through appstore will be much more expensive than the computer page, it seems that because the AppStore will deduct a part of the handling fee, and then the video website is unwilling to bear the fee is added to the user [hot eyes]
1064	The money of ta is estimated to be about the price of a fine [embarrassing]
1067	The world capital is the same, but every technology giant monopoly company, finally found that the launch of new technology products, no big data to cut customers leek convenient, and then further found that financial lending to cut customers leek faster, so have been wearing the skin of the technology company, grab the Wall Street capital financial vampire life.
1070	Every day to play Taobao elimination music, Taobao gives me a full total of more than 100 small things than other people's account to see dozens of expensive [doge]
1073	Test every day, and then interview, and finally fine 500,000, don't tease
1074	When Tmall buys something in a supermarket, the account number I have bought once is 39.9, and the account number I have not bought once is 9.9. Ask the customer service is that there are some activities, the specific situation is not clear
1075	Tmall, the login account is much more expensive than not logging in!
1081	Tencent Ma Huateng's father is not a port bureau cadre, that era can buy a telescope people,,
1082	Can Tencent not send a lawyer's letter to Xinhua?If the small media exposure can't be allowed to delete the video?
1087	The Tesla Justice Department has nothing to do with Apple. Apple's tax collection is just for virtual items. Are you taxed by Apple for buying things on Taobao?
1090	Taobao is also so, the same link, after I opened the price was twice as high as others.[Crying Out Out There] [Crying Out There]
1091	Taobao also has, another account did not have how to buy things, less dozens, I often buy things account on more money
1094	Taobao the same commodity point in the price is not the same, through the collection point in more expensive than direct search point in.There are also the first order reduction discount, can be a few to 20 pieces.
1095	Taobao Tmall also has, I bought it after I found that there is cheaper
1096	Taobao special edition, point into the shopping cart goods, after a period of time to go in, will increase the price.Delete and rejoin, and you will restore the original price.Pinduoduo, Taobao activities during the purchase of things, buy a few days to restore the original price
1098	Taobao merchants also love to play clever, the price of the goods is particularly high, a lunch box hundreds of millions of that kind, in order to be in the "price descending order" that piece can row a little forward [spit]
1100	Taobao bought things before a second of the first single discount five pieces to refresh only a piece of discount, so a second absolutely hungry. me is to kill are very fierce
1104	Will Taobao kill the big data?
1106	Taobao shopping cart, the mobile phone end clearance is more than 5800, the computer end clearance is more than 6400 [doubt]
1111	Taobao jingdong has the same link I buy and send this link my friend to buy dozens of pieces away [eat melon]
1114	Petri dish Hushaby dish: Learn abroad, direct percentage fine.
1118	Aren't they supporting domestic mobile phones [doge]
1119	All the system platforms are doing no news, don't ask or be buffering
1120	So confirmed when the remediation ah?
1122	So why isn't there a corresponding reporting mechanism for this video
1128	So I change my account for about a year or so
1130	So I buy air tickets in these app to see which airlines fly I want to fly the routes I will go to people's official website to buy [doge]
1131	So I roll, do don't buy, even if buy a few big e-commerce platform price comparison!
1132	So which phone is cheap?[sinister smile]
1134	So say!When the country gives the official price comparison software, we can directly compare, [crack melon seeds]
1135	So can you fine it a little harder?
1138	So buy the cheapest smartphone?
1142	Although they do have big data to kill well.But this test is not this test is Apple Android is divided into different channels.
1143	Although compared with Treasure Island, everything can be solved with mobile phones, but it has really caused a lot of problems ah
1146	Algorithm industry has a type of work to do the research of coupon distribution algorithm, the essence is to give someone what coupons, a nice point is called promotion, but to be honest, now which worker orders takeout without coupons?
1148	I think that the last money is not all to fall into those software companies
1149	I saw the brand price of the car on the quark browser. In two days, a shop in Guangdong would call to ask if I was not to buy a car
1150	Litigation P litigation is indeed parity, the price rose rise
1152	Dead heart, do not have serious injury type punishment, it capital won't bird you
1153	Dead god bleach and Xinhua News Agency are still concerned about the Dunhuang side, but there is no news there, not Xinhua News Agency's fault
1155	Private capital is good
1157	To be honest, an ordinary two-room shop, annual profit between 100,000-200,000 yuan. If illegal within the business scope, the fine will be tens of thousands of, almost the percentage of annual profit!And an annual profit of hundreds of millions, billions of companies within the business scope of illegal, fine is between hundreds of thousands to millions and even fines of some of tens of thousand…
1158	To be honest, it's too hard to prove air tickets, after all, ticket prices are known to fluctuate over time.You have to prove that you are killed because of the different platform / user, and at least you have to ensure that the query results are based on the same timestamp, meaning that you can only construct the packet yourself and then parse the return results.But you can't say it is not illeg…
1159	To tell the truth, I found that Meituan ele. me has this phenomenon. After a period of more selling points, I will find that the price is getting more and more expensive, so it will not point, or the two platforms will change the point
1160	To tell the truth, killing is just a business means, and not illegal; say Gong Duan first to check Tencent, the music platform has long been a dominant
1161	Say that Apple users are not lack of money barrage really nt I think about this video mainly with what mobile phone has nothing to do with it is originally to reflect this phenomenon of killing familiar to your mouth has become a lack of money?
1162	Say Apple tax is a problem with the brain, or ear problem, and Android than you can say, the left two are Apple phones, also two difference, tax is divided into models?
1166	Don't think about it- -is this the equivalent of Apple's tax on Chinese airports. Is it possible?[dislike and avoid]
1168	To put it, the law is not to safeguard the rights and interests of ordinary people.If capitalists pay ten times a hundred times the price, will it still be illegal?If it only costs less than one in ten million, what reason should it have not to break the law?This is connivance, and the result of connivance is essentially encouragement!
1170	Say a fun thing, you use WeChat to talk to your friends about the things you have not bought before, and when you open Taobao, you will probably recommend it to you
1171	It's better than good, delete the comments first
1182	Shu zhisong Android is also 369, we verified that day, a new mate40Pro taxi price 11.5, and Apple price, a mate30 and a red rice, taxi price is only more than eight yuan, a whole three yuan less...
1183	True cattle batch, the software to check the ticket, buy a ticket or the official website to buy it.Cyberpunk is true, and monopolies are becoming more and more profitable
1185	The best Lihua to protect the world is just killing, which can be blamed on Apple?Domestic software malls are basically in 50% of the draw.Let's talk about it
1186	Mobile phone is a garbage thing, all feel very high-grade, I early did not use, the same too good.
1187	Is yi rain duck [hot word series _ knowledge increase] that I have been looking down on Taobao... [hot word series _ knowledge increase]
1189	It is time for the state to use a set of algorithms to regulate these companies
1191	Yes yes yes.Internet companies are just like this.Big data is used to people for people [crooked mouth]
1192	Yes, I buy fast food at the Meituan family and raise the price every time.Ask the merchant and the merchant said it did not rise.
1195	It turns out that Apple buyers have to pay [doge]
1199	I once searched for tickets, once at 5:00,5.30, to 6 o'clock, I found more than 100 more expensive than before
1200	Capitalism is bound to lead to a moral decline
1202	Entity also kill familiar, how do you check?Business there is a price difference, kill the word itself is from the traditional sales industry.And the selling is not a currency, the price fluctuation is still within a reasonable range.
1203	Real-name report flying pig
1205	When the smile use Pinduoduo to find the same item, find it is a little more expensive, find it several more times will be very expensive, at this time for a new mobile phone to find it again, will be a lot cheaper
1212	If you use Apple, you, the driver will charge the same price, you pay more
1214	When will the RMB digital currency come out?Suggestions when the time comes APP with aviation railway binding, believe me, when the time comes absolutely need not pay treasure WeChat,,, recommend loan investment to me every day, bored to death!!!
1215	[doge] will they set the penalty limit.Ah b you stand to make money good, ye is a big member, send a positive comment can also delete [doge]
1216	What profit, how will the capitalists do, how to say that sentence [wonderful ah]
1218	What big data, don't listen to Jack horse blow, is to lure people to consume, you let him make money, look back also have to praise him real in.High, really high
1220	Who had developed an anti-big data pig kill software will be caught in jail ah [nose]
1225	Last weekend, Feizhu booked hotels around 120, Meituan 140, the same hotel, Marriott, the hotel in Chengdu, the same one in different platforms gap has [speechless]
1226	Shangyan Wang has some, you use this to buy goods are actually raised the price, I spent the New Year was pit, bought a few things sister helped me check to find that the price difference is less than twice more than four times
1231	Last time I booked a hotel in Ctrip, the same hotel with the same house, my number is more than 10 more than my colleague's number [tv_ vomiting]
1232	Last time I used the computer on a where, do not board the account, check hang directly showed that there is no relevant route (in fact, there are [rolling eyes])
1233	Last time I saw a video of Meituan, once I used an old and new phone, really have this kind of thing
1234	Last time Jingdong sent a day member, there is a freight voucher, and then I have a Jingdong self-run goods in the shopping cart, the original price is 45 yuan, freight 8 yuan, behind the freight voucher expired, now the price becomes 45 + 8,51 yuan, I use other people didn't come to the member of Jingdong to see, others are 45 yuan, package freight [doubt]
1235	Station b is poor information
1236	Next year you can go to junior high school: someone saw the platform can buy to buy, this batch of do not look at the official website is poor information ah
1240	Shan Qing- _ -and tx holding is not much related, it is more capital general sex
1242	I said nothing. I was disgusted by Didi recently. Although it is convenient to take a taxi, I still hope he can fall
1243	When to hang the capitalists on the street lamp
1244	What, what does it mean?When I buy the same thing, the price will be different?I go, it's so scary!
1247	How do you judge this kind of killing behavior?Aren't the physical stores familiar?Do you legally prohibit price discrimination?
1249	Kill a ripe, a fine of 3 billion yuan, welcome to report ~
1252	Kill ripe what, with my roommate to run takeout, last year the unit price cut four times, this year just out of the first month again, Meituan really ruthless ah
1254	Killing ripe is really disgusting, but according to your preferences to push some good kang this is worth praise, some foreign software is particularly prominent in this aspect [doge]
1255	Kill ripe into the consumption law, a found to report direct compensation for the original price of 7~10 times the price, so that the professional anti-counterfeiting wool to fight evil [doge]
1257	Kill ripe kill ripe bai, we even privacy is transparent, kill ripe can fierce where to ah
1258	A fine of 10 million yuan is reduced by at least 80%
1266	Kill a fart familiar, so the discount out to know the price is different
1274	Good kill [eat melon] I'm the worst cell phone anyway
1275	Kill it, Ma Yun buy a bottle of water suggested 500,000 [yi teeth]
1281	Third-level price discrimination was realized in this century
1282	Three mobile phones on Taobao search for the same store of things, although the price is the same, but the discount is different, calculate
1286	Sharp Ke Reek you forgot about @ Flying Pig
1288	Today's Alipay is not Jack Ma Yun's Alipay
1290	If Apple and Android phones compare, there is no killing, because Apple will charge the app, the app just passed on the cost to the user, so I say the reason for Apple phone garbage, it has a monopoly, what do you do with it?
1291	If the social function and consumption function are divided into two mobile phones, two numbers, one for social networking, information browsing and storage, and one is dedicated for consumption, can we avoid excessive big data mining and use of personal information?
1293	If the country doesn't move, no one will take care of it!The common people are a large flock of lambs!It can only be slaughtered by the capitalists.
1294	If you don't stop, turn off the server.
1295	If you do not log in the account to check the app information, whether the same [roll your eyes]
1296	The meat pine was deleted..terrifying..
1298	No matter how good any law is formulated in black and white, it is useless. The key is to the implementation. However, compared with the benefits it can obtain, the fine is only a very small part. Although it may affect the reputation, it does not compete with other enterprises
1299	The People's Xinhua News Agency
1304	Let the platform be not guilty of the evidence
1305	Let you eat the real drops of lime.This I am familiar, I put all the takeout to myself, the same package is becoming more and more expensive, to eat to the store did not rise, Meituan harvest me and the rider and the store at the same time.
1308	And then?Did you do anything?Is it just a fine?
1317	However, even if the fine is hundreds of thousands, which is for an enterprise to encourage the crime [hot eyes]
1321	Indeed, my classmates and I have different prices for checking the train tickets
1322	But it's like a unpredictable pig.There are too many things to be vigilant just because our takeaway delivery distance from 3 kilometers. the actual map can check the gap to 1 2 kilometers
1324	Don't all global ticket prices change in real-time?
1328	Go to Taobao, JD spend an hour to see a speaker, the next every day is the speaker advertising push, in addition to the mobile phone notification bar push, QQ space and other platforms are also this advertising push.Go to Meituan to see the fried chicken or soup rice at lunch, then every time you enter Meituan, all fried chicken and pot rice stores recommended...I don't dare to order it is all ri…
1329	Last year, I booked a hotel, I booked 248, colleagues ordered 198 [speechless] I now every business trip booked a hotel asked my parents, my colleagues to help me have a look
1330	Last August I bought a ticket, the ticket of the same flight I was a black jing member bought about 50 yuan more expensive than not a member [stay]
1331	Last September to January this year is express the same route has 30. 33. 36. 38. The New Year's day is the most excessive 47 pieces
1332	Last December, I went to Shanghai from Chengdu to use my brother's Alipay to see the plane tickets around 2500 with about my 1600....[Lost] [Lost] [Lost]
1333	Where I go, I uninstalled it
1334	Where has been killing, the same hotel different people the price is different
1335	Ball ball, feel tube these online platform, not only kill ripe, can say online shopping platform and logistics together kill customers, often have all kinds of lost things, also can't find local complaints [rolling] can say now online only dare to buy some ordinary daily necessities, the whole half a day finally is not become an online supermarket...
1336	Churchill's typewriter hxd, in China, the fine is not the point, this is a good thing, as for why, b station someone popular science [OK]
1337	How much money does the old man buy a plane ticket
1338	Please change the punishment standard, according to the percentage of the total value of the illegal enterprise punishment method.So the bigger his company, the harder he punish him.To make enterprises dare not break the law, the existing penalties for big companies are tenth in the bucket.
1340	Please give the Chaoyang Dingfuzhuang Water Conservancy and Hydropower School incident exposure [speechless]
1342	Green Kawasaki is just not getting enough penalties.Once the penalty exceeds the speed of making money will stop.For example, the penalty may be a few years to earn back.There is no guarantee that no fine will be continued.
1344	Having experienced the killing of Jingdong and Taobao, my friend's plus is more expensive than the price I bought after receiving the coupon.Tmall supermarket, the more old customers, the less coupons you get.
1345	personal experience, Due to the more external selling points will find that ele. me has big data killing mature, Not being found out before, Once I ordered a shop where my parents ate, It seems to feel more expensive, Just took a look at my other cell phone, Found to actually exist, Just all the more hidden, Not the underlying price, But on the subsidies, Ele. me has an activity called a 10 billi…
1346	Personal experience, Ctrip booking room, my new user, friend old users, he is cheaper than me, is the original price is different, no discount
1354	In the front row, you don't have to Apple, Apple won't smoke.You buy a ticket must be WeChat Alipay to pay, Apple will not smoke into.Apple is limited to in-app subscriptions and in-app items. Please keep your eyes and don't be misled.
1355	It really happened two days ago.I use the same store to order the same delivery on my phone, my boyfriend ordered the shipping into 7 yuan
1356	I just bought a thing on Taobao two days ago, 40 yuan cheaper than my daughter-in-law saw, the same store of the same specifications.
1357	Two days ago, my friend told me by voice at QQ to eat roast lamb legs, and then Meituan pushed them to me [eat melon]
1358	Two days ago we had dinner, met, the peak period of many people, we also call two cars, everyone is calling, found that the same journey price difference is three pieces... is to see people under the dish
1360	A few days ago, I went to see the movie Meituan for 17 yuan, I also used the red envelope ticket to hit out 15 yuan md that don't I live to buy better
1361	A few days ago, the business trip tickets were searched several times, which directly rose from more than 600 to more than 800
1362	Some time ago, during the Spring Festival, I want to go out with my friends at night to open the dark.I plan to book an e-sports hotel in Meituan, and then I find the same e-sports hotel. My friend's is more than 100 yuan or 200 yuan cheaper than mine.Both accounts have the same accounts open.Later, I called the customer service, Meituan customer service just said that there is absolutely no big …
1369	Other software is not clear, if Meituan, Apple is likely to be tens to more than 100 more expensive than Android.
1370	Other do not say, positioning in the antique city and positioning in 10 meters short of a store, hit the price difference of 3 times, I just found, to laugh dead ha ha ha.
1371	In fact, the best proof is that our business, I often find that the customer price of Apple mobile phone is 10 to 20 percent high, but I can not tell, once I do it, the whole network banned [hot eyes]
1372	In fact, directly banning "big data" from collecting information is the best way
1373	In fact, to avoid killing (no local cookie), app cannot get IMEI.The question is which app can allow you to land in when settlement?Taobao does not login all do not show goods.
1374	In fact, I really don't understand, why the fine is not measured by the annual income or annual profit of the enterprise, you say that this is just to crack down on the enterprise to correct this behavior, but different do not itch, I earn more than the punishment, I still observe this law why
1375	In fact, to put it bluntly, the solution is to download two software with the same function for bai [eat melon].
1376	In fact, kill cooked is very common, but on the contrary, such as shopping to buy a dish, regular customers do not bargain will be a little cheaper, the Internet platform kill cooked learning hypermarket these, began to give you some sweet, develop a habit after raising the price
1377	In fact, the enterprise has good intentions, want to let the Chinese people use more domestic mobile phones [doge]
1378	In fact, buying things has not changed, because I have several mobile phones, changing for Taobao, the price of things in the shopping cart has not changed ah
1381	Old Qin people do not talk around: the public mobile phone to judge good face, will not refuse.
1388	Apple has Apple tax, like Meituan draws... so the price is slightly higher
1389	Apple has smoke, this also blame Apple?Apple trouble to understand you under these software, these Internet platforms are how familiar, the platform is the biggest reason
1393	Apple games and merchandise are more expensive than Android [wonderful]
1395	Apple has adjusted its fees, but some APP does not adjust
1400	Apple has a percentage, higher than Android, so merchants have no choice but to either pay, customers, or the state ordered Apple to ban tolls
1401	Apple phone users are rich people, don't care about a two-piece [doge]
1402	Apple phone Apple to smoke it
1403	Apple buys a train ticket
1404	One of the more software than Android phones is Apple's high fees!Some people blow with the iPhone good, no card, wool out of the sheep, or from the research and development cost of what you consume back.
1405	I feel reasonable [doge] [doge]
1406	If Apple phones, some because Apple also needs to smoke into a little higher
1407	Apple phones already have an Apple tax!Let's ask Apple
1408	Apple collects tolls, this can't be changed, can not use Apple products.So I switched to the Huawei camp and got used to it, and a lot of APP and UI designer have invested in Android, I believe the Android machine will be better and better in the future.
1409	Apple is really big data kill familiar, I buy a tablet to deduct 15, other people's account is not deducted.
1413	Apple is a little more expensive than Android.Don't you understand the reason
1414	I know, the price may be more expensive than Android, but the same price of Apple phone is different, it is obviously the platform in the practice [hot eyes]
1423	Comments have been deleted
1424	Is it illegal for the platform to push ads or related videos through your search or click rate, or through big data orientation?
1429	You can see it usually when you order food.It will tailor you to your relationships and daily spending habits.If you spend a high daily amount.You basically don't get free coupons or stuff.If you never use it, or very little, your coupons, discount coupons, superimposed coupons can accumulate a lot.
1435	Pinduoduo some accounts have black card can be some discount [hot eyes] but some do not, this is not a violation of the rights and interests of consumers ah?Our account number, one can order a black card, one has not
1438	Pinduoduo, my classmate and I search for the same product, and his results are a few yuan more expensive than mine
1439	Pinduoduo Ctrip Meituan and so on, how can you play music and dance [doge]
1440	Beautiful, Xinhua News Agency went crazy
1442	Friends, I have a question, before the computer water, to the school to repair the computer place, repair the back cover, and then let me take back to dry, after a few days to find him to put the back cover screw, received me forty, want to ask the reasonable, in my opinion is to move the screw, a university
1443	Oh I understand, buy it with cheap cell phone models,
1444	Oh maha hungry. me than mei group, the first time I ordered in is 10 yuan, did not buy; the second time or 10 yuan, I did not buy; I quit, he sent me and notice, three yuan, and then I couldn't help but buy [laugh cry] [laugh cry]
1447	Ten years ago, Meituan's 8 yuan for a 10 yuan coupon....[OK]
1449	Annual disclosure of big data kill familiar, this will almost become your retention program, anyway, also rectify not good, as later to open a plate, also save reporters everywhere to look for the topic [hot eyes]
1450	You are really a man [hit call] Xinhua News Agency ah [laugh and cry] to hand over tea to the big guy [applause]
1453	What do you do?They are landlords, no matter how you sanction, expose, the land or their, the benefits of the land or belong to them.You can't change a landlord, or add a new landlord.
1454	You can always believe in Xinhua
1455	You can always believe in Xinhua
1458	Do you think big data "kill"?The reason behind it is actually heartwarming [doge]
1459	You think software data is two Ali Tencent, in fact only capital
1460	You think, so many users of Didi across the country, transaction so many orders every day, and no one will tell the big company, even if they win, punish Didi hundreds of thousands of yuan, and then users should take a taxi or take a taxi, Didi big deal for a name, limited time discount, should make money to continue to make money,
1461	You say that big data kill ripe, say that big data kill ripe, take two apples and an Android, do not say that there is no control variables, say that Apple is more popular than Android pit.What about your data, testing doesn't take a lot of data?If you don't, please don't talk nonsense, it'a black apple.
1462	There are more outrageous keywords to search things for price sorting. Some products don't show that I can't find a car
1463	Are you a fine?You that is a tin stick!
1464	You want to use [sneer] no need not nothing!
1466	You look at your own Taobao savings card membership, how much money in a month, I guarantee that you and your friends consumption habits are different, the membership fee for a month is not the same.My small money saving card monthly fee is one piece more expensive than my large one, and my classmate money saving card monthly fee is 7 yuan more expensive than me.
1476	You punish 50w, people secretly raise all the price of 50 cents, a day to earn more than you punish.
1479	You don't give you discounts, you don't have to throw you coupons all the time.
1480	You just know what?What bullshit big data special kill ripe, punish him 100 billion
1481	You don't, I don't, who else can it kill?
1482	You don't fined hundreds of millions of dollars, no law
1484	Don't use it!Did not call you to use, please immediately uninstall [funny] anyway, there is no lack of you one
1486	You Baidu search, Taobao will give you a push, you Taobao search, Baidu will also give you a push
1487	Well- - - - - - - - - - - - - - -and always ordered a delivery, the delivery fee will slowly rise
1492	Can I figure out a minute or two more to pay?Oh, I don't take a taxi
1494	Better to rise to the legal level [speechless]
1498	Is a 16-year-old boy in Beijing, no news platform reports [bless]
1501	Can you fine it as a percentage, or at least let him spit out all the money he earned
1503	No wonder Taobao's clothes are becoming more and more expensive now
1505	No wonder the taxi is becoming more and more expensive [speechless] [speechless] [speechless] The hotel also lives in dozens of a expensive [speechless] [speechless] [speechless]
1508	Nanchuan drunk red finished I use Ctrip [laugh]
1513	So what about that?What happens, even if it is exposed?Not that it won't change yet
1514	Those similar APP rounds, every time, will be killed
1515	Do you say Apple will it first.Non-virtual goods won't be drawn out.(Move the brain.Do you tb jd wx have to draw 30 percent?
1516	I was speechless about the barrage that said you would still buy apples.If you buy an overseas Android phone to try it, the google service can't use it, let alone resist the domestic rogue apps.That's Apple's problem?
1517	Then I later specifically sell a used 599 Android phone to pay [yawn]
1518	Then I hope that next year's NPC can put forward the relevant regulations on big data rat killing, but also hope to increase the intensity of punishment!!!Return us a safe life, but also us a private life!!!
1520	Can I take a Nokia drip for nothing
1522	That every day exposure, how did not deal with it
1523	That day, I took a taxi to the airport with my colleague. With Didi, we used a Didi taxi together. His Didi was much cheaper than me before I found this problem
1524	Is that a different price with different phones
1525	So usually use your mobile phone, buy things when using cheap?
1528	That can't, check a fine of 200,000...What's not funny or funny
1530	Then open foreign platforms in, M D trade protection to protect this?
1532	That Taobao store is not a member is more expensive than the new customers to buy things?Membership fee is paid in vain, only blame their own social experience is not enough.
1533	That cut a knife calculation [doubt] every time to buy things will recommend a cheaper price out, angry I bought a few more [doge]
1535	That, in turn, would I buy cheaper with the cheapest phone [think]
1536	So what about an Android iPhone?[doge]
1537	Even if they fined them a few more 0 is not so, Nima fined 500,000...
1538	XX: This fine is not enough for I to kill the ripe [crack melon seeds]
1540	Some east, did not buy 12 before, 5700 +, bought, on the road, 5400 +, cancelled the new order, and 5700 +, understand?
1542	A treasure calls this "thousand people thousand noodles", different people search for the same thing goods is different.Think you have money to recommend you a high price, think you don't have the money to buy ordinary things are cheap to recommend you a low price.
1543	In a wis WeChat mall, a box of facial mask is 20 more expensive than Taobao, after spending 100 yuan to buy a membership card with Taobao a price.
1544	Ink dye l I am installed more than a few similar software to raise a magic stick [doge] repeatedly cross jump, ah, big data you guess I am not in your home to buy [tsundere]
1549	Next year can go to junior high school reply @ on b station stare at you: what information is bad?Shouldn't the official website be first-hand information?This should go to the official website to buy ah
1551	Petri dish Hushaby dishes are recommended that enterprises can also go into prison, the crime on the fine (punishment may not necessarily earn more) the cost is too low
1552	Cotton tax payers just ask ha, not a bar, do not plan to use the keyboard supervision
1554	Rice old man's rocking car is normal, the day before yesterday I sat on Didi, my friend and I were in a piece of my mobile phone show is 25 my friend 18. It's all on Android, but I often sit on Didi.
1561	Meituan really not, I before takeout because of a diarrhea lunch back, the result directly sealed my account, the reason said can not tell [Yi teeth]
1563	Meituan spent two weeks to watch a meal rise from 20 bucks to 30, and I directly uninstall [off single doge]
1565	Meituan takeout is really disgusting
1566	Meituan takeout is also, one I often write the address, the delivery fee is often 8 yuan 9 yuan, the other is the automatically recognized address, not how used, the delivery fee is 4-6 yuan, clearly they write and automatically identify are the same place
1567	Meituan takeout kill ripe thief is obvious, the same store and the same goods expensive 7,8 yuan [speechless]
1568	Meituan takeout coupons, before 5 yuan to buy 10 yuan of membership coupons, now 8 yuan [embarrassing].I said kill ripe, people cheer words.[awkward]
1569	Meituan takeout members used to buy a 50% discount of the extra package, ok, now give me a 20% discount, pull down,????Go with Ele. me
1570	Meituan takeout members know that, in order to save money, I will buy members every two months [hot eyes]
1571	Meituan takeout of the member plus volume, before is 20 volumes ten pieces can buy.Later it seems to be 20 fast buy 20 roll, and then hit 85% off, I can only say, you buy you this roll still have a fart use
1572	Meituan is true, that refueling bag, if you don't use it for a few months, it will become 50% off. If you buy it frequently, you will rise to 20% discount
1576	All of Meituan's APP's are the same
1577	Meituan garbage!At the same store, the same delivery address, and search at the same time, my colleague can order a 16 yuan package, I can not find this product at all, the cheapest is a 18 yuan package.The above information is 100% true
1579	Meituan and Jingdong is to kill the ripe.The more expensive the takeout ordering.Order a more than twenty soup powder and eat 8 pieces in the store.The 5-yuan red envelope was still bought for 4 yuan
1580	Meituan allowance, Ele. me subsidy: I didn't use big data, I returned the random reduction to users![OK][OK][OK]
1581	Meituan and Ele. me I have changed numbers, parents don't understand that I am doing so [hot word series _ harm]
1582	Meituan and hungry.Long-term use and long-term use, his membership price is different
1583	Meituan, Ele. me, went up
1584	Meituan ele. me Didi Ctrip, I have experienced killing familiar
1587	Meituan taxi, my second time than my sister's first dozen 10 yuan more expensive, it is outrageous
1589	Meituan 40 yuan Qianjiang City bus ticket station printed out the denomination 35 yuan is really a dog thing
1598	Every time I take a taxi, my girlfriend and I all open the Didi, the same starting point and the end point, the same time, never once the price is the same.
1599	Media: investigation capital: the masses: translation: translation (translation: finished, somewhere and have to pull back from us!The old slip ball)
1600	useless, just like the company late fine, now no fine, deduct bonus, now is the direct price difference, later people make random red envelope
1604	Nothing is a huge fine can not solve, if any, if it goes bankrupt [OK]
1605	It's useless. No one can save the capital.
1608	No use, how or how, privacy should be collected as well
1610	Unexpectedly, I always thought that the mobile phone ticket price is the same as in the ticket hall, more knowledge, actually there are big data to kill this operation.
1615	No use casual exposure random penalty according to the legal standards top penalty are not afraid in addition to these software we have no other software to use some to choose?
1619	Few official accounts dare to comment on it [wonderful]
1620	There is no law to say what you can take of him
1621	I want to scold Meituan... because I have two meituan takeout app boarding numbers, and every day I will find one cheap and one expensive speechless
1622	Yes, especially Pinduoduo, it is very kill
1624	Cat ba zha hey as long as the Internet company, all know how black inside, really some people think these big companies is charity, in recent years ali do a lot of charity, surface image is really good, a lot of people say conscience enterprise, I laughed, pit you 100 pieces, 10 pieces to do public welfare, you a boast I am a good man.There is no denying that Ali Charity is doing good, but it is …
1625	Buy a few app round, because the same store app different prices, booking a hotel several app than buy, the same hotel different app price is different.
1627	Buy tickets all with 12306 from no other software
1628	I bought a Bluetooth headset and cut the price the next day by 29. Still the same cell phone [laugh and cry]
1629	Buy a ticket, see 1000 yuan, point in to pay, show 1000 no, quit to have a look, 1050 [laugh cry]
1630	Buy a train ticket has the official 12306, the air ticket [laugh and cry]
1632	A high-speed rail ticket is always the same price as a 12,306 ticket
1633	Buy a computer has a saying: strangers kill half, acquaintance grand Slam
1634	Buy a computer, buddy mobile phone JD shows to have a coupon cheap 600 I this mobile phone can not find that 600 coupon..
1639	Mosaic exclusive channel physical store, the price is transparent, everyone comes the same.The mobile phone is privacy, and each person will not have too much communication and communication between each price.Even if there's just in your circle, there'll be no difference.If you expand to the income class, you will know that for the same family barrel at 9.9, you need 99 yuan.But you will never k…
1641	If the report is successful, the price is 1000 times the penalty
1643	Muck, it was really too much before.Shanwei to Shenzhen, the first time 45 (lower than the official railway price) the second time 55 (the same official price) the third time directly broke 100, mainly because my mother and I had not taken the high-speed train before, back and forth for half a long time.Ctrip APP opened and back, back and open.Just watch the price soar... Garbage Ctrip... [Goodby…
1644	Travel to the edge of the universe has solutions, prohibit software to obtain user information, in addition to the positioning function, user information can only be managed by the country, and then the country provides disguised information to other software companies (such as the user name is replaced by numbers, and is randomly changed over time)
1654	Ling, reply @ night night to dawn: change, every time I look is to change, never more look more cheaper, and change a mobile phone to look is cheaper [hot eyes]
1657	Two mobile phones, one Android and one Apple, are loaded with seven or eight booking software,
1658	Two blue biubiu s were very angry, at that time, but what can the customer service do?I don't know the right complaint channel either!I just have to let my friends pay for this big [doge] wave
1661	Even promotional ads are now targeted mobile brand push, what your oppo phones make money, your vivo phone, your xxx phone make money do you know [stay]
1662	Two mobile phones, at the same time in the same location in the same store, the cost is different, at that time I was numb.
1663	Use to kill to earn millions or even hundreds of millions of dollars, was caught fined 500,000, for you you do?
1664	Using big data to pull wool, the country to create a billionaire is not a dream [OK]
1666	Legislation gives the algorithmic source code of these platforms to government analysis and regulation.Not to mention the impossible, Microsoft Windows can give the source code to the government.
1670	Lei Jiayin I bought the same thing on Taobao, I clicked to buy three times, but didn't buy it.He raised my freight insurance price from one dollar to three dollars.
1672	Old Qin people do not bypass the front desk, the system may be based on the mobile phone to answer calls more judgment as the main business is not bad money [doge]
1679	To a few hacker bosses black in to collect evidence anonymous report [off single doge]
1680	Rush syrup and ice [doge] programmers are not stuttering, the real problem is with the capitalists
1682	Garbage big data, the analysis is not out of the reporter.
1686	Hyperbole to say, every discovery, the boss caught the detention for 24h once, certainly no.At present, the punishment is not enough, each penalty is not enough to give employees a bonus.
1690	Ku Lue is difficult to complain, I plan to complain about Pinduoduo, and then I found that the verification code is not received, the phone number of 12315 can not get through, call 12345, and finally or Pinduoduo people [hot eyes]
1691	Empty City [Yi Ya] solution with no mobile phone
1692	Pit 20 million, fine 500 thousand or top, fool just rectify!![Naughty] [naughty] [naughty]
1694	KFC takeout no one tube, the unit price is more expensive than the physical store 0.5-1 yuan [hot eyes] things are more expensive but also charge another delivery fee
1696	Can you Sue?
1697	Can you fine it to 100 million units of measurement?Not painful or itching is connivance!
1698	Can urge friends business to report, find to kill ripe heavy fine, fine 1~10% reward informant [hot eyes]
1699	But this price difference is not particularly big, so why kill it?Why not raise the price of Android, too?If the price difference is large, it is said that rich people pay one or two hundred more poor people pay the original price, then the business has rich customers and will not lose poor customers because of the high price.The problem is that the difference is tens of dollars...Poor customers …
1701	Maybe I had been numb and not shocked [stunned] just wondered how beautiful packaging these disgusting capitalists would use to cover up the disgusting things they did
1702	Maybe I don't understand, like train tickets and bus tickets have an official platform to sell, so I am very assured.But air tickets, you can jump all kinds of platforms every time and find cheap.
1704	Can the state set up a big data supervision platform, enterprises and institutions to collect and use big data to forcibly report, to prevent abuse
1705	Whether technology is designed to benefit the public or to facilitate capital to better plunder.
1707	Relying on the masses supervision ah, fake goods have a compensation three, this also to a, you see those "old customers" are not happy death
1708	After watching it, I was on a business trip outside today. My two mobile phones opened Meituan and two mobile phones in the same hotel, although it was only 3 yuan away
1710	After looking at the bullet screen, it is suggested that these big Internet landlords spend a little money to ask the wave water army and push the reason of the price difference to the so-called Apple system, anyway, people who do not clearly see the apple are [snechger] [snechger] [snackger]
1711	It seems that in the future to buy things online, but also have to buy a cheap mobile phone.
1712	It seems that Taobao has given enough money
1716	Look if the government can control the capital platform or capital platform contain the government
1719	Seeing this, I want to say what I have experienced, I usually use a video App to watch the drama and listen to music, which has always been a tourist identity.One day I wanted to login, and I heard a few songs on this App and returned another App (I don't call) The App pushed the singer I listened to on the last video App.I was shocked because the two App were completely irrelevant, and the login…
1721	Seeing that the Xinhua News Agency suddenly sent this,??Suddenly think of one thing, what was the matter of the shelterbelt, and the Yangtze Estuary empty city of the last hammer
1722	See me, please remind me to go to bed early and the fine is not the purpose, make big is an offer to talk about, just the capitalist, even their own hanging rope are willing to sell.merely
1726	Looking out of the window of the blood, I think it's not a very big price difference is very normal!After all, the platform does services, the service cost of each platform can not be 100% the same!
1730	Open a group, Xinhua News Agency opened a group, quickly follow
1733	Kawaii's mirror hua but behind the two apple time difference 2 pieces is why?
1734	You see you buy iphone, a friend went out to play, dozens more than me, very unhappy, he was angry.Taxi, accommodation, takeout..Wait is more expensive than me.I am using the old Mate20pro.His latest Apple 12pro.A lot plus a dollar
1735	You do not see you worthy of the noble use, later dare not buy iphone, not only takeout big data under the high price can not run away.Unless not using the App.Break Android and laugh to death.My friend won't dare to take a taxi with Apple anymore
1737	It is said that Tencent also drew players according to the game data of what an outline map forgot, specializing in these people.
1741	Unexpectedly, you found it, the next time back to my APP to write a GPS positioning of the same mobile phone shows the same amount of money, you can also find that my big data kill familiar?
1742	Just prove that the problem exists.Now it is time to rectify it.Cannot be limited to fines.Can also order off the shelf maintenance, bug repair, software daily update how not more on this head.The app was closed for several days, requiring the login interface to post a statement " In response to the national xxx requirement, the software stopped maintained during xx-xx."Rectify several times, the…
1743	That's all?Do you know the double big data kill?Tuhu raises a car.I do a small maintenance in my mobile phone to 1200, the same thing, I use my girlfriend's registration for only 450 [hot eyes] [hot eyes] [hot eyes]
1744	Just yesterday, Meituan takeout on others Android point rural base only 13rmb, I Apple same plan 22! Same — store, no coupons!
1747	Even if we know these are useless, how much capital in doing so we do not point, can move?
1748	Even if the price is consistent, it is also very good to do the means, you can raise the price, and then to the first time user issued a relief volume and so on, to kill the familiar is after the price increase.There's always ways to escape anyway
1749	Even if the fine of 5 million yuan is not as good as to put the enterprise chief into the administrative detention for 5 days
1750	There is a lack of regulation
1753	Is the penalty is not hard enough, not what a big problem.As long as a report of 1 million yuan, it is solved
1756	On hundreds of thousands of fines is to tickle, you do not punish billions of billions, they still dare!
1757	Didi, the same starting point and end, I used a 10% discount, more than my classmates need nothing, to several dollars more expensive.It's not much money, but it's just disgusting.
1759	Will not prepare a few more mobile phone WeChat, register a few more wechat, and platform account [doge] like me, what daily necessities are 0.1,1.1 a box to move home, all kinds of concessions to soft, these platforms in my blood [doge]
1761	To be useful, what should the law do
1764	Classic Meituan, the delivery fee is casually added
1765	Often sit on Didi said that the same journey, 10 yuan more than the roommate price (my 30 of his 20),
1766	Often when buying things, I and my colleagues' mobile phone to compare the price of the same product, the same platform, the same time, the price is different, often encountered.
1767	Often Didi, the price of the two mobile phones is different.Really fried eggs
1771	Jingdong does have positions about data killing [mouth]
1773	Software is prohibited to obtain account information, such as taxi hailing, can only calculate the distance, release the price, can only obtain the user's address, and software is not allowed to obtain other information of mobile phone users
1775	On behalf of personal views, price inconsistency will be punished and price differentiation. The direct person who have not changed many times will bear criminal responsibility, calling for legislation as soon as possible and a number of typical ones to be severely punished.Companies should make profits on the value they create, at least or not by price discrimination.
1778	This apple is not available
1781	Today in Ele. me to buy rice 29, go to Meituan to search the same meal is 22, absolutely
1782	Today also tested Didi, 10 mobile phones 10 prices, the most outrageous is that the front desk dedicated vivo y3 that hundreds of pieces of mobile phone 4.6 more expensive than thousands of mobile phones. 6..Six pieces vary, may judge is the old man machine, can slaughter how much [crack melon seeds]
1783	Today Meituan customer service called me, send me an 8 yuan without threshold coupon, everyone to help analyze, there is no pit waiting for me to jump.
1785	Today the fine, tomorrow will kill ripe ratio higher [doge]
1786	Today wearing Changsha national gold center spent more than two thousand repair table, open ford wing to market bought half fan green mutton, on the way home gearbox broke, very angry, smashed the car, backhand bought Infiniti QX60, back to Jieyang steel construction home, I open hunting to cast resume, said my phone need garbage cleaning, but clear more card, I angry, suddenly some headache open…
1787	Today, Didi and around the long route, earned me five yuan more [smile]
1789	Come downstairs, please send them to Xinhua News Agency Station B and Weibo for the theft of traditional Chinese cultural culture and technology in the name of cultural exchange.Jingdezhen professional universities like Jingdezhen Ceramic Institute have recruited many Korean students to study master's degrees, and found no protection of traditional pottery. "Tao Xichuan" (local ceramics and touri…
1790	Solution: 1. No Apple phone; 2. Register a trumpet to use; 3. Offline purchase
1793	Let you Xinhua News Agency make public
1794	After paying the fine to continue to kill, the fine of 500,000 profit 50 million hurt who?
1795	To be honest, what you fine is not the enterprise's money but the user's money
1797	Tell a ghost story, before in the office and colleagues to discuss Jingdong plus members, he opened iQIYI did, I did not, we casually said a few words, which know suddenly a text message came to explain to me why I did not, read a cold sweat, this is what era
1798	Tell a more horrible story, these killer software, Meituan, Didi, pdd, are all tx holding [nose picking]
1799	Zombie super reply @Poseidon-Q: And Didi public relations said that it was because of Apple withdrawal, but in fact, taxi, called takeout service is Alipay, did not call App Store payment, there is no Apple withdrawal, is completely Didi own kill behavior
1800	Suggest oneself to take two mobile phones to try ow, I just casually saw a hotel, poor 47 (a 137, a 90 [doubt])
1802	It is suggested to add an enterprise to detect the big data killing well, confiscate the whole enterprise, and cause it to be owned by the country. Moreover, the senior level of the company, the manager level above 10 years, the higher the position, the longer the time.You don't do business well, give the country to do it, directly to the country to do, so it can be, a year surprise spot check, t…
1804	It is suggested that the future fine to the enterprise should be imposed in proportion, such as 20% of the annual income, or 5% of the total income since its establishment
1805	It is suggested that information verification should be landed in state-owned operation, network real-name system, and then digital currency to get up, evidence collection will be much easier [doge]
1807	It is suggested to carry out public litigation, adopt user class action litigation, and make enterprise compensation according to the number of litigation users.
1808	Suggest to raise the fine on-line, 500,000 change to 5 billion
1809	It is suggested that the illegal income in full refund plus compensation plus fine
1810	It is suggested that Apple system payment can only be paid by Apple ID, and someone complained in Apple to directly return it in full!Enterprises do not cooperate directly removed from the app!It's too difficult to rely on law enforcement, rather than on a mobile phone factory!To tell the truth, if Xiaomi can get the lowest price in software, I will at least get Xiaomi!
1811	It is suggested that every application should make a national platform, similar to 12306, where Lao Tze exploded [single doge] [single single doge]
1812	Recommended aggravated penalty [tv_doge]
1814	It is suggested to classify fines according to the number of users, large companies fined millions of millions at a time, the whole network notification, to see that they are afraid
1815	It is suggested that you can spare nothing in the major software search bar to play some things before they dare not think of things [collapse 3_ pass by]
1816	It is recommended that plane tickets are priced at the same same price as train tickets
1819	The recommended fine is multiplied by the country's population base.
1820	Suggest fine according to the enterprise income amount punishment, or someone else to kill ripe profit is calculated by 100 million, do you punish him 500,000 useful?
1821	I suggest being fined 5 billion, I am not afraid of expensive, if expensive don't buy, but if I buy expensive, I am very disgusting.[spit]
1823	It is recommended to find a fine of more than 10w, let the cheater and those companies to fight their wits.Only magic can defeat magic
1825	Suggest you to follow CCTV a set of "Awakening Age"
1827	It is recommended to change the fine into 70 percent of the company's annual profit amount [crack melon seeds]
1829	Recommended penalty according to the turnover ratio
1830	A penalty by percent turnover is recommended
1833	Weight loss baron reply @ two blue biubiu: this is said to my heart, first of all, do not know the appropriate complaint channel, even how to complain about ordinary people are two eyes a catch blind!
1834	Poor supervision, imperfect and lax laws.
1836	The name of 6 coins [cut nose] think that year, Harrow electric father every time to change the car to take photos for customer service, positioning is not into the circle has been repeatedly jumping, then Harrow became an advertising app with Meituan, Meituan, at least meituan can return the car nearby
1837	The premise of price discrimination is that the price is transparent for users to choose differentiated services. In the case of opaque price, playing this set is cheating, which violates the principle of openness and transparency in the market, and can seriously involve market fraud and improper competition.
1839	Price discrimination was originally the capitalists in order to cut more leeks, but also became a business strategy [doge]
1840	Price discrimination: price the rich people high, afraid he gives less money, give people who have less money a little lower afraid he does not buy, so that he can earn more.
1844	If the trading platform earns one more yuan per person to the buyer and the seller, at least millions of single transactions a day, and millions more [doge]
1846	Strengthen supervision, anti-monopoly must fall into practice
1847	severely punish those who violate the law and discipline
1852	Remember before Meituan or Ele. me member and non-member delivery fee is not the same [speechless]
1853	I remember Amazon did these things before
1855	I did this a few years ago, especially when you just checked the flight price several times with your mobile phone and then went online to check it. You never used it again
1857	A few years ago found that at that time also told people half-joking about this matter, people said it may be because your mobile phone is a little more expensive, at that time did not rest assured about how possible, grass, did not expect to is true [hot eyes]
1858	A few years ago, I was experienced with big data by Taobao Tmall supermarket and tested it several times.My Android phone roommate iPhone, the same product price is not the same.
1860	Even with that said, the software will not be changed
1861	Almost all payable platforms are familiar with it
1862	The law just doesn't apply to the poor
1864	I have also encountered the air ticket, because I use my mobile phone to search too many times, and then directly with my friend's mobile phone to buy.Online shopping is not, because my account more [doge] in fact, a treasure is really not it, I use the new number and common number to see the same, is more recently a first order free how much, real dog.
1865	Air ticket this thing, do not see repeatedly, otherwise every time you see the air ticket price, a more than a expensive, don't ask me how to know [OK]
1866	I have air tickets for multi-platform price comparison, including the official website, and then place an order [OK]
1868	Please buy your tickets on the official website to avoid the middleman price difference.Hotel... Ah
1869	Tickets must go to the official website to buy, more than the platform to buy a lot of concessions and self-selected services
1870	Air ticket is a very typical example, old check the old point, he put the price up [laugh and cry]
1871	Air ticket price even if the mobile phone refresh several times will be different ah, at least with fast sales as evidence
1872	Air tickets, hotel this kind is shopping around at least, the official website Meituan ele. me Tongcheng Ctrip flying pig and so on app, which is the cheapest to buy which, anyway, you are familiar, are competitors, it depends on who low price [crack melon seeds]
1873	People, do you still want to change your iPhone
1874	Rocket girl 101-Wang Xiangxiu capital: since do not let kill ripe, that all kill cough up [doge]
1877	In fact, if it was not private control, but the state had controlled this information, there would not be any large-scale information leakage on the Internet. The problem is not the Internet, but the people who use the Internet.
1885	Painting bridge misty rain into the autumn wind Taobao Jingdong
1886	Hua Zi open the group, immediately get on the car [OK]
1888	The essence of Internet operation is user discrimination.They stratified users to certain standards and set operational activities for different levels.Price discrimination is a common kind, the phenomenon of big shop deception exists.Only by improving the regulatory system can we keep up with and help the development of China's Internet.
1890	The Internet monopoly capitalist oligopoly
1893	Internet oligarchs are in urgent need of regulation and make money by any means
1895	Later businesses can also according to the same export ip, the adjacent location to the unified price
1899	Well, profit, the cost of crime is too low, even if you punish him, how much can you punish?Is not the rest of the fine is also a lot of income?.....I think I do not know to punish the fine, but also a few years of tax increase the higher the income the more painful punishment....
1902	Very normal, is, men smelly road frozen, now is not just big data kill ripe, some malicious direct black eat black, eat, both ends, such as an intermediary, such as a takeaway platform, the somebody else in you don't know, double eat money, don't care money, eat is earned, such as a taxi platform, a 2 am, three people called express, three prices, 6, I was very curious, since all big data, why do…
1903	Very normal, the system store charges, the platform charges you money
1905	A long time ago, people around me lamented the terrible part of the era of big data. These big companies would put ordinary people in applause, and the responses were "alarmist" and "thinking too much".Later, I found that people are poor is not sad, sadly, I do not know why they are poor.
1906	Don't many people get apps from under the App Store, What did Apple suffer, It's just the wrong, The other companies are just right, Why the game recharge is also divided into game companies, but Apple does not raise prices, Why do iQIYI people raise prices, Not just want to buckle the cost on the consumer head and then buckle the pot on the apple head, Also for the software vendors to wash the r…
1907	Hey hey, when you install Meituan and Ele. me at the same time, the two platforms turn to buy members and you will find...[Wonderful ah] [Wonderful ah] [Wonderful ah]
1908	Dark capital!
1909	Dark capital
1912	And Europe and the United States facing the same problem, the real economy and virtual economy, virtual economy by accelerating the operation of the real economy to gain benefits, is two traffickers, itself does not produce added value, just through operation, big data, to opaque poor profits, difficult to regulation, serious words, Internet companies and hydropower into national control, accordi…
1913	Not just Meituan, Ele. me
1917	Ha ha, the exposure has birds for use?The cost of breaking laws is so low, and this is the first exposure?I do not know how many years, once again a ha ha.
1918	Good brothers, am I doing it right @ Tencent @ Alibaba @ Tong Cheng Yilong @ Jingdong @ Didi @ Meituan
1930	Boy, there was really big data killing this thing, I always thought it was a joke...
1931	Boy, after I returned to China a few times last month, I can't call a car anymore, what it means [hot eyes]
1932	Good guy, every day hit drops to school I am too miserable [laugh and cry]
1934	A lot of software is like this, hard to pit consumers [stay]
1936	Good processing, found together ordered the relevant enterprises to make rectification within the rectification period, app alive app related functions prohibit the use, after the rectification, a similar situation is found to lengthen the rectification period after the rectification.The means of physical stores to move to the network company a quasi
1938	Winter vacation home found himself killed, the same hotel, the same time and leave time, the same room type, the same new application for the new gold map account, after binding the hotel taobao account, price immediately than not binding before more than 30 yuan, and the original taobao account untied, the price fell back [abandon] and, gold map booking hotel can only use taobao account
1940	evil.I knew early, I am the person who knew this thing very early.Take my mobile phone to book the hotel, always feel wrong, and finally take the roommate's order, 20 yuan cheaper [eat melon].Then I found out that math was really a good thing.
1941	Bad, his position is not right, each user gives the software two pieces, plus the software itself to draw into.It feels like you can make money.Good operation mood to give you 2 yuan reduction today, you will also be grateful to Dade.Meituan takeout and Ele. me allowances are all about this
1943	There is also a rectification of the domestic games of 648~ marked ratio and the actual calculation is seriously inconsistent
1944	And the game lottery without big data kill ripe I twist my head off [hot eyes]
1945	Others record the user behavior information and then make subsequent operations
1946	And Pinduoduo!Monthly card is opened, and new users are cheap.Old users are different.Some 12 a month, some 20 a month, the price is different, the more use more expensive, kill ripe
1947	And Pinduoduo
1950	There are hungry. me, the thief speechless, I often order and members, the coupons are 35-4, my colleagues almost no takeout, send 20-12, the first time also calculate, two days ago she told me that hungry. me gave her a coupon, angry back me to unload hungry. me, sick
1952	And Didi!sound of dripping water!!sound of dripping water!!!
1953	There are also iQiyi entry number to see the video has advertising, and after not watching the video to automatically skip the advertisement [doge]
1955	Do you still use an iPhone?Use ah, why not, I have one Android Apple anyway
1958	Or Xinhua dare to say, Xinhua News yyds
1962	Or is the regulation not strict enough
1963	Or not ruthless heart to fine, why
1964	Still take face, did not say "most" and "all" the Internet platform.
1968	Or the crackdown is not enough. If the government gives the masses a reward to collect evidence to supervise the major enterprises, it will not take a year, there will be a thorough improvement
1969	Or the intensity of punishment is low, fined tens of thousands of thousands, people kill a day or two to earn back, should directly let him meat pain, so that the amount of punishment is far greater than the illegal income
1970	Still not, if Xinhua had 60 or 7 million fans, it would be cool
1972	Fortunately, I'm a Xiaomi mobile phone [doge]
1974	Fortunately, the Meituan Flying Pig was unloaded everywhere
1975	Also looked at my bike-sharing card or deducted 1.5 yuan [doge]
1976	Fortunately, train tickets have a booking system for state-owned enterprises
1977	Also must be the people's Xinhua News Agency [hot word series _ blow explosion]
1980	It is better to fine the company forced for state-owned, the boss all kicked, employees forced on work for life, no talent you open what company, that is, the so-called can not compete with the people bound, otherwise those companies do not die on the blame
1985	Ha ha ha, I will never call takeout again, I can cook with bento [laugh and cry] mainly because the feeling of being slaughtered is really uncomfortable [laugh and cry]
1986	Ha ha, the state wants to directly require the algorithm record, later found that there is a behavior of killing directly cancel the business qualification is not bai.How can imperfect regulatory measures and increased punishment hit these Internet oligarchs [doge]
1988	Sure enough, capital is evil!!
1989	Sure enough, innovation is the first place in capitalist exploitation techniques [doge]
1991	Foreign fines are hundreds of millions or even billions of dollars. I think it is necessary for China to learn from it. When the warning shows more fines, he will be numb or even contempt, and we must make him dare not lose so again
1992	When the domestic can regulate and protect the Internet of personal privacy, should be a little better.
1993	Domestic punishment for capital is too light, hundreds of thousands are in massage?
1994	Domestic capital is ready to move.
1996	The state or the people's Congress implements an app, like such reports, of course, everyone can report with the real-name system, and regularly verify the face actions of various videos to maintain the account security.At the same time to prevent the brush to report what.Then accumulate a certain amount can be investigated, and some exposure news also like to advance exposure investigation to ob…
1997	The country can not give a good air ticket APP, 12306 always can not go, the verification code is too Yin [laugh cry] [laugh cry]
2002	Just complain is useless, speak with action, feel unreasonable, resolutely need not be great
2016	No wonder so many app request to read our device information
2017	No wonder Meituan is sometimes priced up high and low [doge] [doge]
2018	No wonder my colleague and I used the same takeout app to order the same meal in the same store, without coupons. My meal is more expensive than his, because my average unit price was higher than his, so so [hot eyes]
2021	In fact, there is no need to scold Tencent alone in addition to Tencent, in addition to Tencent other software are the same kill, flying pig hungry. me Taobao will [OK] to scold together scold is useful, alone scold Tencent that other home do not change useful?
2024	Shopping software taxi-hailing software booking hotel software takeout software
2025	The inexplicable inventory of clothes in the shopping cart is tight for almost 2 months [doge]
2026	Ctrip on Dog Day
2027	Dog east, the same product, 10 old number is more expensive than the new trumpet is outrageous [spit]
2031	What's more ridiculous is that Ele. me uses coupons and more expensive. Does this treat me as a fool [hot eyes]
2032	It doesn't matter with the mobile phone, it has something to do with the account!
2034	Like train tickets, make an official ticket platform [single doge]
2035	Keep a distance from big data, try to cash out for offline transactions, and kill big data [doge]
2036	Depending on the price of different brand phones, isn't this a "price discrimination"?What big data comes from
2037	No one cares as long as you report to the platform officials that they may not even ask or a special official reply saying that your phone location and cache have what problems hope the platform is ok??
2038	Give Xinhua News Agency eldest brother crazy hit call [take off single doge]
2043	The emergence of various emerging technologies has brought all kinds of security risks.Ordinary people use these technical crimes, but capital will not, because capital understands the law [doge]
2044	Personal fool, the fine to the enterprise can be punished according to the percentage amount, the fixed penalty may not be effective
2045	Air tickets and train tickets are purchased on the official website, 12306 and a third party. Of course, it doesn't matter when you are on public business trips, anyway, it does not pay their own [doge]
2047	I am not afraid to use the app right now.Use the train ticket on the official, plane ticket telephone booking, the store directly call the hotel front desk to book.I don't want to be made money by the platform, even for a little trouble
2048	With the progress of science and technology, big data really has the opportunity to achieve first-level price discrimination in the future
2050	High-speed train tickets on the 12306 railway website are directly offline stores compared with online flagship stores
2051	High energy film and television o I collect in the shopping cart items, after a long time did not pay, it automatically for new customers to reduce 5, is this calculate?
2054	Just where booked a ticket, a week ago check 50 cheaper than now, because to plan the route so check these days, see the price increase really thought of, but think should not dare to do so, and then received this push, ah
2055	Just saw a commodity on Jingdong, into the b station to see the same advertisement.[feel uncertain]
2056	Just Meituan and Ele. me have B station account, suggest out of the line [cover your eyes]
2057	Just compared between AutoNavi and Didi, the same route of taxi, Didi 10 yuan, Autonavi 10 yuan discount 8 yuan, I ………………
2058	Just been killed by Didi big data, the same trip difference is nearly 50 yuan, for help, how to protect the rights
2060	Just now, just just now.Like my friend is ready to call Didi, the beginning and end.My 17, My friend 13 [OK]
2061	Just by Xinhua News Agency quickly see cheated coins, and to be you cheated coins [stay]
2066	Feel like this video is all big data push to me [hot eyes]
2069	It feels like Meituan is getting more expensive... not necessarily the price
2070	It is obvious that the ticket, if you have bought or checked the same voyage before, the ticket price will be higher than not checked
2071	Feel very strange ah, why the country does not punish a little more, a penalty of tens of millions of billions at a time, the government does not have this money, which also need to sell land to make money ah
2079	Change, fine 1.5 billion start!
2080	It is time to rectify the Internet "technology" companies
2081	Cain 47 went to the hotel to find their theory and upgraded my room.I'm fucking
2083	To serve the people, and to constrain the capital
2090	The plane ticket is really kill is very obvious, I have experienced several times, the first time to see more than 500 yuan, three minutes later became more than 900 pieces.
2091	The plane ticket a few days ago it was 400, a few days later it became 1000 [doubt], how can I TM go home
2094	The cost of the crime is too low, it is suggested that big data kill out forced down a month of rectification, a total of three directly permanent shelves
2096	Anyway, no one cares about it, the most important thing is no legal basis, can only choose not
2099	Is the rule of law loophole???Why should they make so much money!Common people's money is the hard-earned money of suffering day by day ah!These businesses are robbers but are not punished by law.They are equivalent to the bug of the world, and they master the technology and can do whatever they want!
2113	Penalty is hard to decide how much, less?It can be earned back in a few seconds.More penalties?Or that the consumer bears the final cost.Suspension of operation?At present, most service providers on the market head only two or three, suspended one of them, is to give others a chance to cut leeks.Tax increase?Refer to more penalties.Forget it, after the accident, catch the final control person is …
2117	After all, the more fines from the user, the harder the rip off and the more rampant user information
2125	The fine is too low!No one manages the complaint, pit people
2132	The fine is not strong enough, and it should be fined in one billion units.Suggest reference to foreign fine standard, punish millions, hundreds of thousands of kill a mature seconds to earn back what use.As a capital, of course, would rather pay a fine to kill, I pay a fine, while making money and earn more.
2133	It is best to greatly increase the fine amount, and then increase the peer or individual report channels and give a certain proportion of the total fine bonus as a special reward to safeguard the public interest
2159	Penalty 50w, before people kill a million, fine is useless, but make a little less [speechless]
2162	If one case is found, if the platform is suspended for half a year, and with unpredictable changes within half a year, competitors will get up to create opportunities for other platforms and create healthy competition.Suppress monopoly.
2164	Find killing, and what?Penalty of 50 for punishment?
2165	Discover a must report [2233 niang _ anger]
2168	Comment just want to top to the Xinhua News Agency who all tmd do not pretend to be dead
2169	Comment just want to put the Xinhua News Agency top all tmd do not pretend dead ah
2170	Comment just want to put Xinhua News Agency top all tmd don't pretend dead @
2174	And why Beijing fly southwest of Guizhou Guiyang is the most expensive air tickets, thousands of times, the surrounding areas of Guangzhou, Guangxi, Chongqing, Sichuan and Hunan air tickets are cheaper [hot eyes] I basically spend two or three times higher than my roommate every time home.Green trains take about 10 hours
2180	Ele. me and Meituan are working around, so we can't, just for the time being
2182	Ele. me, Meituan, all cooked ah [eat melon]
2185	Nausea, really disgusting, we are not bad that few dozens, but without us to do this kind of disgusting things, I go to your capitalist's genealogy
2186	Nausea, in addition to nausea or nausea, I used Meituan to buy takeaway red envelope, and then the two days without a card to cancel several times, finally saw me cancel several times directly gave me a special discount red envelope coupon [smile] [smile]
2187	Below more management, increase fine intensity
2188	Search several times on the price increase, order a few freight insurance, freight insurance will do more than 6 yuan, after ordering two show more than 9 yuan, and Meituan booking hotel, I use Meituan less show the price 198, a friend used more than the same link point show 209. [tv_ supercilious look]
2189	It would be nice to fine more
2190	Check a few times more the price will really get higher, before you buy a ticket the next day to see again up [hot eyes]
2193	To kill the ripe software directly off the shelves will certainly work
2194	For the later difficult proof because I do not know the algorithm, why you need algorithms to prove it, can't you compare different mobile phones like the video?
2195	For the barrage of things I want to say: Apple smoke does not include takeout, ticket tickets, etc.Apple's purchase includes the following aspects: if the purchase behavior acts on the APP, such as the APP (paid download) that you need to buy, game diamonds, APP members and other virtual items, you need to go in-house purchase, Apple draws 30%.If it is physical goods, such as takeout, ticket, tra…
2197	The most intuitive feeling for me is that most people used to order takeout for about 15 yuan, but now it is basically 20 yuan. Before, ordering takeout was cheaper than in the store
2198	It's very unfriendly to Apple phone users. Maybe the more expensive the models are, I can fight the one plus five for a few more years [doge]
2201	Poison APP into the collection of more than an hour did not pay up more than 100, have not to buy
2202	TikTok put the user's mobile phone as a broiler, the background to the user account to post comments, I found three times, I did not open the comment input box, but the screen prompted "comment success", and then I quickly opened the comment, as expected, "I" left a comment, look to strict check
2204	Did not reach the point, or quite a fully competitive market environment, but also put aside that blow the market, is the lack of supervision and punishment
2205	Are almost into menstrual news, the question is someone remediation?
2206	Understand, this will buy a 1000 mobile phone taxi
2209	Understand, buy 2 mobile phones
2210	Understand, today with my father's mobile phone to order takeout, tomorrow with my sister's mobile phone to order takeout
2214	Dong can try to see what flights are on the app. You can confirm the official website before placing the order. For example, Spring Airlines will go to the official website of Spring Airlines
2217	Last year, my colleague joked that Meituan ordered 500 yuan for a four-star hotel with Meituan. My aunt said that the local people knew that a room in a hotel was 160.
2224	Top grid fine only 50w = next time also dare
2225	Is a top fine of 500,000 a deterrent to them?
2226	Top penalty 500 thousand??
2232	thumb up Xinhua News Agency is right
2234	Order takeout because it is cheaper and convenient than to go to the store. When it is more expensive than the store, you don't order takeout and go to the store to eat.[doge]
2236	Camed and criticized Meituan and Ele. me, I was punished by big data, not allowed to buy extra bags, play customer service, customer clothing stupid, and then I opened 5 more numbers, each is the annual fee from pdd, which you forced me [doge]
2237	Name call: Tencent, Alibaba, Tongcheng Yilong, JD, Didi, Meituan,
2238	Name call: Ma Huateng, Ma Yun
2239	Roll call, mobile Unicom telecom all kinds of kill familiar harassment telephone for decades did not see the Xinhua News Agency roll call?
2240	Point back to the arrival and payment interface.It's not the same account, either
2241	First, the first point, now people are too easy to take the rhythm, a little area to run.(Here, each platform is about the same, just a question of how much audience).Second, whether you believe it or not, as long as a person is investigated, whether he has a problem, then he has a problem, after all, a rumor mouth, dispel rumors to run broken leg?If what is not quite right, please give advice, I…
2243	The first time to buy a plane ticket, not sure to buy not to buy, the first time to see 800, the second time to see 805 and finally determined to buy 820 to buy it for a few years
2244	Enter the flying pig for the first time, Shanghai to Guangxi to have 400, go out to come in to add passengers, my 400 yuan?How to change at least 490?Brush again?Don't come out, then buy the 490's.How to buy one more?Then I'll go in and buy it again, what happened?The 400's are coming out yet again?After buying it, ah, I made it [hot eyes]
2245	Didi early deleted, I have long found this situation, disgusting bar!
2246	Didi discount discount volume, buy you know how much pit it is.Buy a 6 $620% roll.Then I take a taxi, and I did get 20% off for the first time.Six dollars less.Then the discount followed, but the discount was higher than my other phone didn't.
2247	This is the same with Didi. Apple two people rides more than 300 travel expenses, Android only about 240 [wonderful] began to think that the card, back closed or the same
2249	Didi is really enough. I had reached platinum a few months ago.Then today I took a taxi to see the price of 72 yuan, I asked my companion to take a taxi, his price is 42 yuan.[Hot eyes] [Hot eyes] [Hot eyes]
2250	Didi is also familiar. On the same journey, relatives (old Didi users) use a Didi taxi, a direct taxi for 8 yuan, and the newly registered Didi taxi is also 8 yuan.
2251	Didi killing the ripe is absolute.I have done experiments, the four students took a taxi shows completely different prices
2252	Every time Didi opens it, the price is different, and it will rise a few more times in a short time
2253	Didi costs two phones for two
2254	Didi often, if you do a car on the common route, you directly click on the common route and you search the location to determine, there is always a difference between a few yuan to 10 yuan, there is no discount
2255	Didi Taxi is becoming more and more expensive
2256	Didi Taxi is also familiar with the killing
2257	Didi taxi out of the right line!Same distance from same start and end point!Week 18, Week 29!Week 3:10 blocks!Stable for 11 blocks after the fourth week!
2258	Didi Dache.Meituan hungry all have big data kill ripe [hot eyes] used all know
2259	Didi Taxi, Android machine, before the taxi in Beijing was added money he did not feel, but also think that there are coupons and preferential, anyway, the road conditions in Beijing are also blocked, so it is not easy to judge the price comparison between waving taxi and Didi.Now back home, we take a taxi to the hospital, 6 yuan.On the first day of Didi, I spent more than 6 yuan and went home at…
2260	Didi Dache
2267	Low consumption, not buying a house, not getting married, not having children, is my way to fight against this capital society.[OK]
2268	Low emotional intelligence: software big data kill familiar.High EQ: software big data identifies the poor, the reason is warm [doge]
2269	Low eq: big data kill ripe
2270	Low eq: big data kill ripe
2271	wait a minute!Price discrimination is a win-win situation, how do you start to rush, campus cards, some discounted goods and so on too much, in the face of different people to give different prices, and even some morning and evening prices of different goods, in essence is also price discrimination, how do you...
2272	Wait for the snow snow last time Jingdong saw Elet rice cooker, darling, all the software advertising has rice cooker, uc, Momo, QQ, Pinduoduo, Taobao, Vipshop, made me sick
2273	It is true, my mother and I, Taobao search table found out the same style, but the price is hundreds different.....
2274	We need to improve the provisions of the Internet laws
2278	How should you check it out?Start with two or three mobile phones, then connect to a different WIFI and turn off the Bluetooth GPS, and then refresh it
2279	Who exactly is the capitalist ah?Our national capitalists can be powerful foreign capitalists are what garbage ah [crooked mouth]
2280	When profits reach 10% they will move, when they reach 50% they will take risks, when profits reach 100% they dare to trample on all human laws, and when profits reach 300% they dare to risk hanging
2283	Is it common sense?Buy air tickets to draw an apple into what?[Question] [doubt]
2284	The barrage is a group of cloud users.These entities and other payment apple is not drawn, this is the price is not understand?This is also washed?So to say my bank card transfer draw 30%?Hope to smoke these more every day??Users' money, anyway, they do not care about their own rights, but also to help to wash the land [doubt]
2285	barrage said penalty is really no problem, now is who tell who compensate over, like direct lawyer to iQIYI advance on demand, platform illegal cost block, according to the user registration fine directly, tens of millions of registrations according to the number of 10 yuan can kill them, see which platform also dare to demon...
2292	In terms of air tickets alone, the best way to solve big data killing is led by the Civil Aviation Administration to integrate all domestic airlines and develop an online ticketing platform [eat melon] similar to railway 12306 [eat melon]
2293	Catch a penalty to the capital feel pain pain, otherwise the company senior who care ah, also feel is line rules
2295	Catch a fine of 50% of that year's profit, the state Treasury is sufficient is not happy
2296	Even if large enterprises impose a fine of 100 million yuan, they can reach hundreds of millions just looking at the activity flow of the original god. Then compared with these large platform enterprises, users are dozens of times that of a second yuan game, which can be estimated.The premise of the masses is that the masses will be willing to make such a proof for the 2 yuan, and few people will…
2298	Big data graduates said that learning hair is lost, graduation also face unemployment, read a wool
2299	Is this what you play with big data?[feel uncertain]
2300	Big data identifies the poor by 2 yuan.[show the whites of one's eyes]
2301	The scariest thing in the big data era is big data
2302	The era of big data has limited our vision, allowing people to only understand things unilaterally, leaving many circles far apart, and preventing people to passively absorb new information.
2303	Who is managing big data?
2304	Big data has been familiar for several years. When can it be solved?Please improve regulation and punishment.
2305	Big data killing and killing is suspected of price discrimination
2306	Big data kill other I don't know.But a third-party platform, Ctrip.The same journey.Meituan's price generally takes supplier data.There are only service fees and some products to make money.The price does not know where to come from, but also bullshit the third-party platform to kill familiar
2307	Big data kill ripe is very normal ah, the last time I used the flash to send WeChat 20, Meituan only 12. This is the dependence of the eating users, do the product is to make money.
2308	Isn't big data killing said a few years ago?This also requires testing?Most people who have online consumption experience know it
2309	Big data kills ripe oneself
2310	Big data kill ripe, I saw the Xinhua News Agency reporter kill crazy [tears of joy] [tears of joy] [doge]
2311	Big data kill familiar, give you a customer portrait, in you did not discuss
2312	Big data kill ripe, big data era, times kill ripe, oh roar.
2313	Big data to kill
2314	Big data makes capital easier to cut leeks
2315	Big data is to collect privacy for the enterprise service, in addition to the conventional improvement of operation, not kill what use, with the belly also want to [doge]
2316	Big data is big data
2317	Big data is good (
2318	Big data is good
2319	Big data also has privacy rights
2320	Big data also kill Apple [doge] before the taxi, my colleague Apple mobile phone 60, my Android mobile phone 40 [crack melon seeds]
2321	Big data analysis can't do it with me [doge]
2322	Big data all understand, Xinhua News Agency does not want you to whole you, anyway, you can't catch [doge]
2323	The disadvantages of big data points are prominent
2324	The role of big data is to harvest the common people
2325	After all, the use of big data is still card cost increase price is not it, can not believe that human nature is the law of our survival.
2326	The difference between big data is more horrible than we think, and even if you watch videos and comments, it will selectively show you what you like to watch
2327	The purpose of big data is to serve capital. Don't talk on various functions, every result is to guide capital
2328	Big data should not be used to capitalists to kill users, but use large to improve the quality of products and services for enterprises to serve users well, so as to continuously promote the progress and development of society.
2329	Is big data unfamiliar or big data?
2330	Isn't big data just used for businesses?(Dog head life)
2331	Big data is not on that
2332	Big data must be controlled by state organs and cannot be given to capitalists, otherwise it is a blood-sucking weapon and mobile phone privacy
2333	big data?It's just brushing the background to collect data
2335	Big platform: the penalty is not a penalty of about five hundred thousand?
2336	Where do you buy air tickets and high-speed train tickets to buy ah
2337	It is relatively the most cost-effective to really go to the airline official app to buy, each airline member day also has a cheap member price, if often travel can save points to rush the passenger members, irregular can be points or low price lift cabin [OK]
2340	We all understand, but why there are no "relevant departments" out to enforce the law?
2341	@Vone a stupid fish: Air tickets to the airline's own website APP to buy.For example, China Southern Airlines often has 40 percent off-season tickets.Meituan above or the original price [OK]
2342	It was found about half a year ago.My friend and I are also Android system, using the same software to find, because his mobile phone is a little older than my model, his side is always 30 to 50 yuan cheaper than me.Really outrageous
2343	Big and can not fall, the government can do nothing
2344	Bder, Xinhua [Support] [Support]
2346	Big Vacuole replied to @Meek_Mill: [OK] After ordering takeout, he and his friends will take turn to buy hahaha
2348	Open the computer Taobao does not log in what can not see....[Hot eyes] [Hot eyes] [Hot eyes] [Hot eyes]
2349	A taxi is also expensive more expensive than other cheap phones!These companies are getting brazshameless
2350	Will a taxi app be charged an Apple tax?
2351	Fight not dead might as well do not check, check the fine, after the enterprise to continue to kill us, fill back.Penalty penalty, make half a day or the user's money
2352	What to say about never a taxi [doge]
2359	Created a more fully competitive market environment, and then we come to kill ripe, just say which APP on the market did not kill ripe?
2361	Trump's cousin Johnson plane is best uploaded to a national website at a fixed price for people to buy a ticket can check reports if a high fine of 100,000 large items are applicable
2366	Unless you find a penalty of 500,000 yuan [embarrassing] and then specially organize a group of people to brush this data, and then a corresponding penalty, may be timid
2367	Go out to travel an APP hotel price at home is 200 to the location changed 320 [laugh cry]
2368	Out of the standard written apology, no, need not be responsible for, even if the fine, for his money is also very small
2372	Full competition can not bring fairness, we have to make clear his internal algorithm to prove that killing is nonsense.Summarize the consumption data of different consumers to reach a certain amount, in fact, we can prove the fact of killing the ripe.
2374	Fully competitive for ——> mutual reporting
2376	The 648 players said they knew Apple had a draw, and everyone was by default.This should not be considered familiar, compared with the platform of old users and new users.
2383	Punishment is not what strength ah, this kind of profit often start millions of millions, even if the penalty is tens of thousands of thousands of fines
2385	Punishment punishment is king
2390	Chen Ping inequality reply @ meat loose loose not loose: delete what?
2391	Dust xing is mainly a variety of members, buy paid APP, recharge a variety of in-game coupons, and a variety of reward consumption.
2392	Pingping: Tesla's brakes broke and driving to the market didn't come back [doge]
2395	Check and what, the punishment is not painful, the lack of supervision
2399	Grass, the comment I just posted was deleted?
2401	Step on the zai spray on my Huawei mobile phone, a few years ago, the railway station didi home round trip 20 yuan, this year changed a vivo, round trip 17 pieces [hot eyes]
2405	Not only Apple mobile phones, high-end Android is also the same, will be killed according to the price of your mobile phone, with an expensive mobile phone will default that you are a rich man, I don't know whether Didi and other daily commonly used software is also priced according to the mobile phone model [White Valentine's Day _ fist hard]
2408	Do not know whether the exposure is useful, I hope to solve it earlier!
2410	No fine, let them grow unlimited.
2411	Without having to create any competitive market environment, the notification of invalid direct sanctions is over, indefinitely or permanently removed the app, seizure of qualification frozen assets, a combination of fist down to make an example, this group of capitalists will wake up, know who is the father
2412	Don't shop and buy on one platform, but shop around on multiple platforms.[Laughand cry] [Laughand cry]
2414	Don't buy an iPhone, don't buy it.
2415	Don't be misled because Apple is expensive, so the app positions you as a high consumer and prices you higher
2418	What does the painless punishment change
2419	Different mobile phone users who have watched videos or searched for problems on the same network or have searched for certain goods in an app, and then other users who have used the network at the same time will receive similar search questions and product advertisements... is that familiar?I feel like this is really too k, b, with no privacy at all
2421	Don't understand why so many people buy air tickets and don't go to the official website?I think the official website is much more useful than Ctrip and so on ah!
2422	Isn't that not to say?What about the result?Will the state not punish it?
2424	It is not difficult for consumers to prove platform some practice, is that consumers can hardly prove platform any practice [speechless]
2425	Not that the software was smarter [doge] was just that we were seen through
2426	It's not Apple, like games, Apple takes 30% of the money members pay app.And the Android platform will also work out.Can you order a 100 yuan takeaway Apple can still charge 30 yuan, what doesn't exist, is the big data kill ripe.How to make each customer pay as much money as possible is one of the topics that capitalists are most concerned about.
2428	What doesn't Apple cost two dollars to do with smoking?
2433	Not afraid of fines, afraid of removing the shelves for rectification
2434	You should not be fined casually.Be sure to use a knife.And the knife was stabbed in to see the blood.
2438	Not just Level 3 price discrimination [doge]
2440	Not only to consumers, such as delivery platform to riders, my friend runs outside. If you often receive very cheap orders, the system thinks you accept cheap orders, and you often show you more and more cheap orders, or even 3 yuan a order
2441	There will be no one who does not know that the price is different.I look at them all on multiple platforms.Ctrip flying pig to go where three pick.The bullet train is just 12,306.
2443	Not only this, my friend and I use Didi at the same time on the same way, she is a few dollars more than me, because my phone is fruit X, she is XR [speechless]
2444	Not only between the mobile phone models, but also by the age of the machine owner and economic income.At the same time, my mother's Xiaomi phone was nearly 10 yuan more expensive than my Apple
2445	Not only kill ripe, delivery platform, get red envelopes and no red envelope, delivery fee is a difference.In a word, you seem to save money, and the platform will never lose
2448	Don't know not to talk well, Apple only buy goods from the Apple store, you don't go to the Apple store, he took what smoke, is killed
2449	What is it not?Is the punishment?No punishment... then what's the difference between you and you fart?
2450	Add an Ele. me play...For example, I ordered takeout and entered the payment page, and the final price was 30. I went out to buy a coupon worth 5 yuan. When I came back, I found that the freight rose two yuan.After choosing a 5 yuan coupon before, I found that the reduction amount was less than 5 yuan. After canceling the coupon, I found that the price increase was higher than the initial situati…
2454	Don't ask, ask is the positioning is not allowed, what air ticket?Goose, may be the phone distance from the plane, where to get money [doge]
2455	Don't say kill familiar last year to Guiyang to see the house to say that the face recognition is the most lively when the sales office directly said that I have this again is not this price [doge]
2456	Don't to mention Apple tax, two Apple machines compared did not see, the afternoon that machine difference 2 pieces
2459	Don't cut it down
2460	Among other things, the most common Meituan takeout members: still within the membership period, the renewal members range from five yuan to ten yuan.Wait until the member expires a few days to buy members, immediately drop to more than three yuan.If you haven't used Meituan for a long time, opening a membership can even be cheaper to a few cents a month.
2462	Mark 178 a big bed room, order seconds change 198, I return to the last page, and then order, this time is 178, really magic ah, Meituan
2464	After all, you say the rules of the algorithm, so you have a chance to get away!Yes, @ Tencent @ Alibaba @ Tongcheng Travel @ Jingdong @ Didi @ Meituan!
2468	It must be fined until it cannot bear it
2470	For example, Taobao..[Laugh and cry] [Tears of joy]
2471	For example, a goose news, against the risk of being fined to earn several hundreds of million, and then was found, to a fine of 500,000, and then ensure that the next time will not.Next time you will make hundreds of millions of dollars in another project [wonderful]
2472	The essence is price discrimination, depriving consumers of the surplus
2475	Being killed by the platform is familiar also can not escape ah
2476	Be killed by Meituan
2477	Which official number of the APP named in the field will dare to explain it
2487	Half of Apple ah relevant departments need big data monitoring, refer to the prism door [doge]
2488	Percent fine
2490	White night naked oat foam I use Meituan, 4 yuan opened a member, gave 6 volumes, the first time to go, the volume can not be changed into 7 yuan exclusive volume, the second time to go, can change, the first time did not buy because I saw can be changed into the exclusive volume, so quit reenter found that can not be changed
2491	White piao to soft feet forget another, @ Pinduoduo.You are also such a virtue, don't laugh at others.
2492	If my account number is sealed, it is your capital in fooling around [crack melon seeds]
2496	Publish the big data killing software, and I don't have to kill me
2500	A fine of 10 million units
2501	According to the percentage difference of the fine, can big data identification type, there is a corresponding proportion of the price increase range.
2505	Love meng 2 zero two b station only member purchase and members, I have tried, the price is the same, still so expensive
2508	Do the Aldians need privacy?
2513	Ah... I just wanted to buy a $10 home slippers, and I slid three pages of all $50-100 slippers....I just want to ask you in the comments section in some treasure search slippers are really the price of this range?And feel is not inflation before the search is a dozen or twenty
2515	Ah this won't really someone buy flight still buy from fly pig have no points even if you buy more also have no airline gold and silver card [play call]
2517	Ali department is the least bottom line. The price of flying pigs is often more expensive than other APP. I can only buy them in flying pigs every time I use the enterprise payment. The hotel is dozens of yuan more expensive than me a night, which is outrageous.In addition to other cooperation when the contact with Ali people, now the Ali impression is very poor...
2523	WakoWapi replied @ Friday: he means the law just gets the poor
2524	Did up, the platform official public relations contact you private?
2531	tinmo2016 traveled a few years ago, viewed the hotel online in advance, watched it a few times, and then cost higher at a time
2540	The saw-sweet reply @Homoschlepien: he means that an app will kill it, the price will rise less, and it can slow this killing.I do it usually
2552	Meek_Mill reply @ big Vacuole: My Apple, the same mobile phone, the same delivery APP, most stores used to have a delivery fee, later several months without that APP, now come back either no delivery fee (free), or much cheaper than before.[Lost] [Lost]
2554	Mather wish the world Apple system tickets is not smoke, otherwise 30% even only 10% of the cost is better to buy a low-end Android machine to book tickets.
2555	Lau Stuaft Fish Takeaway, Hotel, Tickets [Smile]
2556	The KINO_1790 Apple tax is for in-app purchases, the subscription of the software itself, with 70% to developers and 30% to Apple.However, commodity transactions are not in-house purchase, and do not take the Apple payment way Apple is not a tax, you see those clear prices on Jingdong goods Apple and Android purchase price are the same, Alipay spend 10 yuan Apple can not withdraw three yuan.
2558	Apple can't get the tax. If you see, the clear price items on JD buy the same price for Apple and Android
2560	I'm not afraid of JD. I have a price comparison assistant
2561	Jackson_XIE reply @ little jump frog today nap: the Internet is your kind of keyboard man is not clean, I as an iOS developer just realistic, Apple smoke only smoke program purchase, you this kind of ticket is inside purchase?It is a third party
2564	The high-cost of iOS system may be that iOS is too high, but indeed many software has obvious price increases for old users, so I want to know why my Meituan has a 20% discount for the renewal membership?
2565	The iOS and Android should upgrade the system permissions and deny the app access the phone model
2568	Reply i860 @ Yibai Hei: This is not the point. You can discuss with him in advance. I use your tools to repair the consequences, which usually costs a few yuan for nominal tool rent.If you have the strength of me too, do not ask people to solve the problem by themselves, the cost is the lowest.As we all know in development, the complete defensive design cost is higher to two orders of magnitude h…
2571	Different Homoschlepien app prices are not very familiar.Must be the same app and the same hotel, but because of the user's mobile phone model, user activity, and even the user's consumption habits, preferences, and the behavior of the different pricing is considered "big data kill familiar"
2572	hhhSherry is more than after you search or Taobao, you will see product products in various places such as WeChat Taobao browser
2573	HanGo said to buy a plane ticket apple draw achievement is not outrageous, am I pay treasure to transfer one thousand apple draw 300 ah [doge]
2575	GanlvTech reply @tobell: Random vertical reduction means that the original price is unified, and the real payment is not unified.There is still a difference between the two claims.The easiest way is to compare prices with the airline's official website.If it is more expensive than the official website, there is a problem.
2578	Delivery: only 2.9 members this month
2579	Prices change a lot for emmm tickets
2582	DECENTdamnation fines should not be fixed in number, should be a fixed percentage
2590	B station big member price is different people, the discount is different.I report
2591	Blooming_Day Taobao you use not those functions to kill ah
2592	Blooming_Day You wouldn't think you were cheap, just the normal price
2597	AokIvan: I don't care what you use, but this video is about big data killing. What has to do with Apple smoking?What are you post this comment?
2600	Abyss_Nova video watched no?Compared with the same platform, one 1118 yuan, one 1120 yuan.
2601	The 600 ticket gave me up to 1200. Ctrip.Where to go to wechat.Alipay.The four eaters are so disgusting
2604	A huge fine of 500,000, it will take several minutes to earn back.Afraid of fear
2605	50w fine for these enterprises, casually kill a few to make up back, fine 50w and punish me 5 yuan what difference, just drink less a bottle of water [eat melon] [eat melon]
2607	315 Hair, this is to fight the big data kill ripe?
2609	2 yuan a person can not see much, but if millions of people across the country, it is the difference of millions of million level... I generally direct Alipay or 12306 to buy, haven't pay attention before, now I drive back home will not care...
2610	During the epidemic period in 2020, Ctrip bought air tickets for my father. The price of the two mobile phones and the same flight is different at 2333, and my total ticket number is expensive.
2611	In 2013, there were news reports about the hotel killing skills.
2617	I ordered the same item four times in 10 minutes because I get one more coupon with a higher value after each payment
2619	... It seems that you have to prepare a few more mobile phones in the future, before buying all search again [hot eyes]
2621	[sky-high fine]
2623	Big Data Value to Oil
2626	"The government needs to step in and break down on Google and Facebook"
2630	_ Mr.Water Cousin Johnson: The ticket price is fixed, how much money depends on the discount
2631	_ Love, so I usually limit the price to 20 yuan
2634	[Laugh and cry] Meituan to buy yuan ancestor cake, 8 inch 258, real pay 235, and then that day inadvertently use his wife's mobile phone to look: discount 50. [Laugh and cry]
2637	[Hot eyes] So we should go out of the door less play mobile phone
2640	[Cut the nose] Those who are still eating takeout are rich people, no 50 or 60 can eat nothing, difficult and expensive, I have been useless for a long time
2641	[Eat melon seeds] tickets with the official software 12306, with the capital software you are really trust
2643	[Dog] The more order takeout, the more expensive, the price can drop after a few days...Most young people have experienced it
2645	[Turn your eyes] Didi more dozen more expensive, do not know whether to kill ripe
2646	[Eat melon] So I use a Google phone.
2648	[Eat melon] Every time I open Pinduoduo, I feel like the luckiest person in the world [funny]
2649	[Eating melon] is that the fine is not enough.Once found.To losing money, no one does it
2650	[Eat melon] no need no good?In addition to these things just out when used, after too lazy to use, after all, otherwise buy Wuling Hongguang MINIEV why!Unfortunately, Wuling didn't give me any money
2653	[tv_ frown] rarely live in a hotel, I now only use China Bank because there are discounts.Also compared with the official website of China Merchants Airlines (Xiamen Airlines Egret member) and Flying Pig, China Merchants Bank is the same and lower after using coupons.Originally, the flight home before the epidemic could have a-20 coupon within 2 months, so that the flight back to school can still…
2654	[OK] Hotel two mobile phone price difference of 200 yuan!!!
2655	[doge] Since I saw my colleagues on Meituan a few years ago, and then the same store price difference, MeituanBB 1 [Hot eyes]
2659	[doge] said good is economic progress, the number of administrative fines, 20 years ago enough punishment, 20 years later......Mosquito meat
2660	[doge] Is the fine awesome, still beat, laughing
2662	[doge] Is capital the core of the company?
2663	[doge] Big data is magical, not easy to prove to kill familiar, but can be face recognition
2665	@ Ctrip Travel Ctrip
2666	@ Ctrip
2669	@ Tencent Video @ Alipay @ Taobao @ Jingdong @ Meituan @ Didi Taxi @ Ele. me.Come out and slip away, why don't you say a word?Now, after being exposed, he is going to be an ostrich?In my country, this behavior is called: drill a dog hole
2670	@ Tencent @ Meituan @ Didi @ Alibaba @ Ele. me @ Flying Pig
2671	@ Tencent @ Alibaba @ Tongcheng Yilong @ Jingdong @ Didi @ Meituan,
2672	@ Tencent @ Alibaba @ Tong Cheng Yilong @JD@ Didi @ Meituan [doge]
2673	@ Tencent @ Alibaba @ Jingdong @ Feizhu @ Didi @ Meituan @ Ele. me
2674	@ Tencent @ Alibaba @ Didi @ Meituan
2676	@ Tencent @ Alibaba @ Tongcheng Travel @ JD @ Didi @ Meituan Capitalist [Yi Ya] [Yi Ya] [Yi Ya]
2677	@ Tencent @ Alibaba @ Tongcheng Travel @ Jingdong @ Didi @ Meituan climb out [spit]
2678	@ Tencent @ Alibaba @ Tongcheng Travel @ JD @ Didi @ Meituan heart is not a ghost out of the table [smile]
2679	@ Tencent @ Alibaba @ Tongcheng Travel @ Jingdong @ Didi @ Meituan pretend to die?I came out to wash the ground.
2680	@ Tencent @ Alibaba @ Tongcheng Travel @ Jingdong @ Didi @ Meituan
2681	@ Tencent @ Alibaba @ Tongcheng Travel @ Jingdong @ Didi @ Meituan
2682	@ Tencent @ Alibaba @ Tongcheng Travel @ Jingdong @ Didi @ Meituan
2683	@ Tencent @ Alibaba @ Tongcheng Travel @ Jingdong @ Didi @ Meituan
2684	@ Tencent @ Alibaba @ Tongcheng Travel @ Jingdong @ Didi @ Meituan
2685	@ Tencent @ Alibaba @ Tongcheng Travel @ Jingdong @ Didi @ Meituan
2686	@ Tencent @ Alibaba @ Tongcheng Travel @ Jingdong @ Didi @ Meituan
2687	@ Tencent @ Alibaba @ Tongcheng Travel @ Jingdong @ Didi @ Meituan
2688	@ Tencent @ Alibaba @ Tongcheng Travel @ Jingdong @ Didi @ Meituan
2689	@ Tencent @ Alibaba @ Tongcheng Travel @ Jingdong @ Didi @ Meituan
2690	@ Tencent @ Alibaba @ Tongcheng Travel @ Jingdong @ Didi @ Meituan
2691	@ Tencent @ Alibaba @ Meituan @ Didi Taxi @ Jingdong
2692	@ Tencent @ Alibaba @ Meituan @ Didi
2693	@ Tencent @ Alibaba @ Didi @ Meituan
2695	@ Tencent @ Meituan @ Alibaba @ Taobao @ Pinduoduo @ Alipay @ Ele. me Don't pretend to die ah, all come out and slip away
2696	@ Tencent @ Alibaba @ Tongcheng Travel @ Jingdong @ Didi @ Meituan
2704	@ Taobao, @ Jingdong, @ Didi, @ Meituan
2705	@ taobao
2707	Where are you going
2708	@ Pinduoduo cut down a single and cut it off crazy [dislike]
2709	@ Pinduoduo
2710	@ Meituan takeout
2711	@ Meituan takeout
2712	@ Meituan, @ Tencent
2713	@ Meituan, @ Ele. me, @ Tencent, @ Ctrip
2714	@ Meituan @ Dogdong [doge]
2715	@ Meituan @ Ele. me
2716	@ Meituan
2717	@ Meituan
2718	@ Meituan
2719	@ Meituan
2720	@ Meituan
2721	@ Meituan
2722	@ Meituan
2723	@ Meituan
2724	@ Meituan
2725	@ Meituan
2726	@ Meituan
2727	@ Meituan
2728	@ Meituan
2729	@ Meituan
2730	@ Meituan
2731	@ Fliggy
2732	@ Didi Chuxing
2733	@ sound of dripping water
2734	@ sound of dripping water
2740	@ Alibaba @ Tencent @ Jingdong @ Meituan
2741	@ Alibaba @ Meituan
2746	@ Meituan
2747	@ Meituan
2751	As a major majoring in big data...Learn about the [doge]
2754	Recently, the coin is particularly generous, worried about being killed by big data.So, only white whoring, pretend to be a poor diaosi.
2755	Recently, a cat is not big data, but also suddenly off the hot list
2756	Is there any big data killing incident recently?
2759	Finally, I think there is a problem about the dependence of the mobile phone. The value of the convenience brought by the mobile phone is far greater than the value that you are pulled away by big data, so there is nothing to worry about by obtaining information with a mobile phone. There is no need to criticize this way of obtaining information.
2762	It is best to give a policy, do not allow to kill ripe, appear to want compensation [eat melon]
2764	To summarize the tips, usually do not search for light luxury items on the browser or shopping APP. (The following is my personal opinion) If you can, try not to give the APP permission to read the browser.
2766	Since being seduced by sexy underwear on Taobao once.....[doge]
2769	It is useless to be poor, you don't have to fill in your address, your gps, your w i f f information app all know, then your relatives and friends, where you live, the community unit price is flat is obvious.
2772	Mainly is the travel websites to kill familiar
2774	Never use your cell phone [doge] It will monitor you [doge] [doge]
2775	Your reaction is slow, Ctrip I deleted two years ago [sneer]
2776	l: A lot of the time is the input method betrayed you, APP read your input records and then push advertising to you according to the keywords, understand why the major rogue platforms are so keen to do the input method?[Pick up the nose]
2783	Only big data can fight against big data
2785	As long as I get poor enough, it doesn't even get my big data with [doge]
2795	As long as I am poor enough, the capital can't cut me [hot word series _ knowledge increase]
2798	As long as I am poor enough, no matter how big your data, are to kill me [yi teeth]
2799	As long as I am poor enough, big data can not take me [doge]
2800	As long as I am poor enough, big data I can't help
2802	As long as I am shameless enough, big data can't hurt me [doge] [funny] [wonderful]
2804	As long as I can't shoot, the capitalist sickle can't cut me [hot word series _ knowledge increase]
2805	As long as my cell phone helps me make money at work, I have no request [OK]
2807	As long as it's poor enough?Look at you, is this a human saying?It should be that, as long as we are rich enough, we don't care about big data killing [doge] [doge] [doge]
2808	Just wait until my big member expires
2809	Just don't fall into the capital trap, right
2811	Only see not to buy [painting style mutation] [painting style mutation] [painting style mutation]
2812	@ Ice _ blue: I have met that I also, order takeout to me deducted one yuan, my friend just created the number deducted 5 yuan [cry]
2814	WeChat didn't have the money to go to the restaurant where I had been ordering takeout before, but I found that the package I had been buying was so cheap, and then I never ordered takeout again.
2815	Before Taobao defined me as a treasure mother, I am a Buddha, I am a flower season girl, do her mother
2816	Before I ordered takeout, the price of my roommate and I for the same thing was different. I spit up, it's true that Apple phones buy something more expensive
2817	Before the Pizza Hut app delivery fee cost more than 10 yuan, Meituan Ele. me seems to be only 5 or 9 yuan
2818	It's really useless. Your phone can listen to your daily calls
2819	The truth, big data kill number is really alas!We can only say that the technology is progressing too fast.Want to play how can play dead you, obediently hand over your money.
2823	This is really sex, first takeaway is not familiar with, taobao I am understand, goods is a merchant, not taobao platform, there is no kill, up said browsing search low goods, you do later see low goods, user portrait does exist, that is because taobao has thousands of people, you search cheap things, taobao guess you like cheap things, thus improve turnover rate, will not make a originally expen…
2824	So I say my delivery tickets are 50-4...
2825	This is true, I was the original god uninstalled twice, yesterday directly single draw five stars.Finally, I found the answer
2826	This is a virtue reply @ Riding a small motorcycle to fly: No privacy at all
2833	This strawberry is not sour and yes!And the activity strength is very powerful!Much cheaper, but go to see the price every day
2837	Is this dog JINGdong
2840	This video is also pushed for me by big data...
2849	How do I suggest station B?Let's suggest that he make two plates, one is big data analysis recommendation, the other is random recommendation.There are already sections for hot recommendations.
2852	How to pull up the Meituan big red envelope [soul out-of-body]
2859	Having stayed at home for so long and didn't order takeout, now Meituan Ele. me texts me every three to five times, saying I have a red envelope
2860	Passing by while working in the big Data Bureau
2862	No longer want to renew 88 members, this Taobao Tmall kill familiar is too disappointing
2863	One another thing to you.The same type is like takeout, and you have several software of the same type.That kind of monopoly, that kind of you can't do it., They will steal the data from each other.T ^ T then you can pick one of the cheap ones right., Just like some Pinduoduo phones, selling more than 1,400, and some selling more than 1,700.However, the one with over 1,700 people still bought it.…
2864	Operation a, you use history to see the lowest plugin is not allowed, we in order to adjust the lowest threshold activities, will change A to B, you see the lowest price of A, but B can do lower, at those days, I do a lower than the lowest price, you can't help, people in the plane, just under the United States, disappeared
2866	Originally I don't ship because of fgo big data kill familiar [doge]
2869	Yusaka 00241 hahaha I thought I was alone.Whatever his price, buy happy; happy is priceless, feel for a lot of time and energy, make the mood is not worth the loss.
2871	So the big data of the takeout platform judged that people who have seen this video could not whoring red envelopes [hot word series _ knowledge increase]
2872	One night when I went out for a walk, I was talking to my mother about Miss candy's warm nail oil (ps: no phone), I took my phone and wanted to see the delivery of Dangdang, so I saw the automatic keyword push in the search bar: nail polish warm nail grass, I was scared that day [out of body]
2877	Some people say that improving the value of their time to avoid the waste of time in the worthless comparison, in fact, this is simply a false proposition.Price discrimination is a trap, willing to jump in to help the number of money is also Q too far.Desire is endless, promotion is also a false proposition, from a piece of toilet paper to a trillion yuan of technology companies, there can never …
2880	There are fake milk powder, you choose to buy imported ones, you have haze, you choose to wear a mask, you have fake milk powder, you choose to buy imported ones, you have fake vaccines, you choose to go to the big city for vaccination.If there is a fake product, you need to learn how to tell the truth.Now with big data, you tell me how to set up my own phone.Life needs to learn to think.What exa…
2881	Meituan Ele. me has more than five coupons every day....
2882	Toxic bar, I Taobao to push me sex underwear
2883	Friendly tips, the use of price comparison website is the most easy to disclose personal information oh.
2886	There are still a lot of coupons, but I basically don't use them anyway.Spend money is mainly to buy a happy, I order out for half an hour I do not want to order... originally shopping desire is not high Taobao is about three thousand a month.Is either to save time or save money of a choice, at home idle wool (legal circumstances) to be very good, usually work is enough tired, for dozens of yuan …
2889	With the mobile version of the B station, information cocoon room, are recommended that you are interested in, let you look down on other
2892	Use another phone, no Bilibili account.You'll find many more excellent videos.
2897	Because this video is a bald man who silently unloaded the itch mouse, and silently installed it back, everything is done quietly
2898	Because sometimes they use Taobao as Baidu, so they can't see me
2899	Because big data Luckin coffee to capitalist leek?[doge]
2902	Later Onmyoji and Tomorrow Ark morning download evening uninstall
2903	Has already uninstalled uc.trill.quick worker.Uninstall your mobile browser step by step.
2905	Take once a week or once half a month
2906	A new UP yo [Human Evolution History] What is the root cause of big data killing? The evolutionary history of thinking tools
2908	After reading it, you can look at the supplement [human evolution history] The root cause of big data killing is the evolutionary history of thinking tools
2912	Garfield, who can never meow, is based on the general location of the base station.However, this location indicates our personal location, so it is still stealing user privacy.
2913	Garfield, who could never meow, was shot by JD.
2914	Garfield, who can never meow, replied to @Deer: If you just buy things, I think you can buy billions of subsidies, of course, some of them are deliberately raised prices and then reduced to the original price.
2926	That is to say, it is not reasonable to not allow consumers to complain about the moral kidnapping of express delivery boys.Just that big data allows me to eat high-price takeout means that it has the ability to eat takeout on time, because urban traffic is much easier to analyze than my consumption habits.I can only say that they do not complain but also stop others do not complain about those p…
2927	It's a little useful for occasional takeout. I have to rely on takeout for every meal to kill or be kill
2928	Ye hates rumors [nose picking] Some people are too lazy to do it or have no time to order takeout [nose picking]
2929	To beat the data with the data
2931	To beat big data with big data
2932	To be banned............
2935	Learn, and this goes to uninstall the game [doge]
2938	Learned a quick delete
2940	Learn, this unloads the Onmyoji
2941	Learn, this unloads b station [insidious]
2942	Learn, this is to go with Ma Yun opposite the line
2943	Learn, this goes to uninstall collapse 3
2945	Learn, this will go and Meituan opposite line
2946	Learn, this goes with big data
2947	Learn, this point unattention
2948	Learned, uninstall the b station
2949	Learn, when I take my wallet to dry over the big data, the day of triumphant return is my three consecutive times!The wallet is empty?Slip away [doge]
2951	Learn big data major, I, a little panic ah [doge]
2955	Brothers tell you to order takeout Meituan Ele. me is the same price
2956	The starry sky is boundless but I should be the Jingdong promotional video [wonderful ah]
2957	Star cherry fall big data kill familiar refers to the same goods or services, old customers see the price is much more expensive than new customers.
2958	Information asymmetry can be alleviated by the consumption of time cost. The problem is that the capital complicates the preferential mode, the time cost is too large, and many people directly give up directly.Is there any good platform or website to intuitively compare and have a certain calculation?
2961	Uninstall software![Funical] [Eat melons]
2962	Uninstall JD (etc., I didn't download it)
2966	Disinstall unloaded reload back through the old simple
2970	The Institute of Chemistry of the Chinese Academy of Sciences of A C G replied: "Buy slowly", I use to check the historical price, which seems to be a little longer than the others
2971	Banana look at me special!I tmd only used one Ctrip, and I didn't compare it.Think about it.Delete not delete
2974	The same is true of Taobao after the next season, but not necessarily.Some do not fall
2977	Like the Canadian merchant approach.As long as other stores are cheaper than their own, sell at other prices.One price for the whole network.
2979	Xixi watermelon 2 buy not to see the number, actually useless.Buy is not just see not buy choose
2982	What I hate most is big data...Xiaomi browser saw a video to me the same...And b station
2983	I just want to close the b station big data to do too bad
2985	I don't order takeout directly
2988	In addition to the first order of new users, my food delivery platform has never had a discount volume, love to order,
2989	I order takeaway at school are red envelopes, what takeaway festival food festival to send coupons, 10 yuan to 15 yuan discount, the minimum with 0.01 to order a takeaway, even if the coupon is greater than you buy takeaway will not show 0 yuan [tears of joy]
2992	I have repeatedly uninstalled games and shopping software many times for mobile memory reasons and really found some differences especially for Onmyoji [doge]
2995	Do I now use big data on Taobao to save money??
2998	My Taobao account was closed because I had an item on the store. After that, I always used the bound payment. Later, one day I used Pdd to choose Alipay to pay. After 1 day, Taobao sent an email saying that I had unsealed my account
3004	What we have to reflect on is never big data killing, but are we too dependent on mobile phones?Modern science and technology is good to liberate manpower, but too much dependent on it will become leek, who do not want to become a slaughtered leek?
3005	We now contact with outside, understand, buy, etc., most are through the mobile phone, mobile phone can be the most personal identity information, is our most cannot control things, software permission, peep your software use, files, photos, etc., even some software you don't give permission cannot use, even if the permission a software content has nothing to do.
3007	I like Taobao and Jingdong most of the time cheaper than Tmall flagship store
3008	I buy things rarely on Taobao dog dong, that thing is really....Quality is worrying, good-looking clothes so cheap, buy back touch kneel [laugh cry] or physical store is more reliable
3010	My mother plays every day spell duoduo water mining what, month card 29.9, I buy things are not frequent, month card 3 [funny]
3011	My mother helped my grandma to buy something, because I applied for what koi card, and then I asked my mother to give me the link, I copy and open the saving flower APP to jump to Taobao, and then the 95 yuan chair on my mother's mobile phone??Into a 109 on my cell phone???I asked the seller what was going on, and then I copied and jumped Taobao back to 95???
3012	I have two mobile phones, four numbers, and no takeout without red envelopes
3014	Do I use big data to play the King of Glory gold diamond??
3019	I don't think I shop around because I have a better choice for electronics
3020	I think the mobile phone is listening, otherwise how to do the voice to wake up the SIRI little love and so on?
3024	I said why last year Ele. me sent me a bunch of coupons for 15 minus 5,20 minus 7. Now I think the shopping cart was too expensive to buy, put it and forget it....[tears of joy]
3026	I was slaughtered, go out to play in the same store of Ctrip hotel my classmate mobile phone 350 night, my mobile phone 530 night,,,, has deleted Ctrip,,,,, [speechless] [spit]
3027	I often don't go to Meituan membership coupons, but I used 5 quarterly members in January, and I haven't have a chance to eat takeout yet
3029	I often use big data to get what I want, is to search something on taobao, then see taobao recommended, is a variety of same types of products, there will be some unexpected boutique, or use big data to realize b station, as long as long as you search some very pornographic keywords, search results, of course, but after time home page will give you, you just push your video all thumb up so give y…
3030	The last time my sister went home was to buy a plane ticket on Taobao. She used Apple and my Android, and her plane ticket money is one or two hundred higher than me
3032	My friend and I see a set of board u at the same time, the same store, he 1500 I 1700, in jingdong...(:) I tmd was surprised
3036	I still like big data, I only watch the UP videos and automatically recommend it to me the next time this update is available.I don't need to pay attention [funny]
3038	I visit Taobao only visit do not buy, only visit jk clothing area [dig the nose]
3039	I like Taobao according to sales, and then find a 10th around [wonderful]
3040	I just saw someone in Kuan saying he was killed by big data, then I saw another article about avoiding big data killing, then I opened bilibili, and you saw this video about avoiding big data killing.This calls me how to avoid big data kill, I have been killed [tv_ white ye]
3041	I just met it in Ele. me.My sister ordered takeout two pieces cheaper than me
3042	I first called a car on the AutoNavi map, but then I found out that Didi Taxi was cheaper.I ordered at least eight coupons anyway.
3043	I found that Taobao really blocked low-priced goods. I bought 960 graphics cards, and the average price I found was 390~410, so I turned over the goods every day, almost 3 days and 50 products to find 339 graphics cards
3044	I found that JD added things to the cart or clicked in every day, in two or three days [nose]
3045	I eat instant noodles big data master Kong sell 5 pieces a barrel [cover face]
3046	I understand, I will go to uninstall the Onmyoji
3047	I order takeout is more than 8 yuan do not order, the student party has no money ah, sometimes class is late
3048	The principle that I order takeout is that it is cheaper than if I go to the store to eat, and the takeout that can't save money has no selected value [Yi Ya]
3049	My Taobao push has been changing every day for different kinds of goods [yi teeth] the reason is particularly simple I believe you can guess [sneak smile]
3051	My mother, it has to fight wits with the mobile phone, it is not easy, the mobile phone is a recreation place, so play a mobile phone is too tired [laugh cry] [laugh cry] [doge] [doge] [doge]
3053	I had done in the financial training industry, once asked a very famous teacher in the industry about financial intelligence, she gave her own example, the first day and a friend WeChat chat said so-and-so bag is quite good (the teacher said for the first time, the bag) the next day the car into taobao, taobao recommended the bag to her....
3054	I have never opened the location service for b station, its advertisement actually said: XX small partner pay attention, come to b station work....
3055	I became a b leek, uninstall
3056	How did I come to Station B to watch your video if I don't rely on these electronics?
3059	Not only did I not become a member of the takeout big data disaster, but I almost became a [doge]
3062	My B station recommendation is a little sister is also caused by big data.
3063	The problem is, even if I know that the price is high, I still want to buy things, after all, I really need things, and I have no more time, etc.
3066	Why is it scary that I did not touch the phone and turned on the something that just discussed directly on the main interface
3067	In order to make big data think that I am a poor man, I decided not to invest in money [wonderful] [wonderful] [wonderful]
3069	WeChat follow card rice Tesco, and then buy it there, don't thank you [OK]
3070	The smiling Qiu bi I average Meituan, and then go to the store to contact the boss, the boss gave me at a very favorable price, not MeituanBB 1, and I also enjoyed the discount
3071	alarmist, the society does not need to progress, the primitive society will never worry about these, we should be the primitive people
3072	Web side, do not log in to check the price, how?
3074	I buy online I am all browser not log in account then search
3075	There is no privacy in the Internet. In the era of big data, we are all naked people
3078	Well, I still have a 28,000,000 yacht in my Tmall cart
3081	I have only ordered takeout in a physical store, and the hygiene and price are clear.When ordering Meituan, Ele. me all see, which order which discount.I like Ele. me. I may not have as many stores on Ele. me as Meituan, so I deliver food faster than Meituan.And I felt that Ele. me had a bigger discount. Once I ordered KFC with ele. me and sent it wrong. I gave me the Meituan list of another pers…
3082	Takeout is a real pit. I ordered my first Beijing roast duck for 32 yuan, and my classmates bought the same 54 yuan.Then I started finding people around me who didn't use the takeout software, and I usually barely ordered takeout
3086	take out?Kill ripe?[Funny] Both were fitted, replaced, the old price I remember
3089	Suddenly think through, king of glory smoke commodity discount is also this truth, grace!Delete it temporarily, and wait for the activity to return again.
3096	Through the intermediary of the mobile network, what you choose is not really or what you choose, you are selected, the filtered information is brought to you through the "intermediary" secondary processing
3097	After listening to the video, I opened the Pinduoduo, 350 discount volume!
3098	Listen to you, uninstall the b war
3102	Taobao a member, I two number price is different ha ha
3103	Taobao is too obvious, I don't buy things on Taobao for two months.."My" interface will appear a sign in and get a red envelope activity [speechless]
3105	Taobao kill the most disgusting, bought 88vip members, but before in Tmall supermarket buy a shampoo cream, I see is 77 pieces, my sister no member number see the same goods is only more than 60, ask customer service, said 88vip has enjoy a lot of preferential, can only raise the price, that I also spend to buy the member do what, do not do members more than ten pieces cheaper than I, too pit
3106	Taobao thousand people absolutely, at the beginning to search the ps4pro show 2700 and then I compared others as long as 2000...
3108	It's so real, I found that the ads I pushed on my computer are learning, online classes, knowledge payment, what I encountered on my phone is shopping, discounts and various games....There is simply no privacy left these days
3109	Too small at big data, it is definitely not so simple algorithm formula, thousands of people, multi-dimensional correlation, and even some app will call the microphone to identify the keywords you usually chat, accurate advertising push.No named here, for fear of defendant.
3112	So next to this video is a JD advertisement
3119	So what is big data?[tv_ query]
3123	Sun stupid's passionate reply @ Shui Yuelin: most people don't understand, it doesn't matter, just really disgusting people, don't give permission to use, but I don't matter now, anyway, my personal information is not valuable
3124	Although I'm very poor, I often see what surface and break the pirate ship..Ma Yun dad you notice your database, that looks very rich account delete delete
3126	Although the historical price this function is good, but many Taobao stores (clothing) is to use the price of various coupons or two X discount, so the actual payment is lower than the written price, the historical price has no reference significance, unless their collection has been paying attention to
3129	Private WULI bad fun seems to be a short story, about cell phone cages and so on
3131	Sibao did the second time to cheat big data video, Sibao???????????carry in breast
3133	tell the truth...Once I accidentally ordered into the male silk stockings in Pinduoduo...Then the push gets unserious
3135	It's useless to say so much, and the only law that can work with big data.But alas.
3136	Having said all that, I personally think time cost is more important, which is more loss.Big data killing is as much a moral problem as the previous profiteers, but I only ask that this society can be better, less kill familiar, more sincere hospitality
3137	Say you may not believe it, our information teacher showed us the old silk video to let us know a ha big data [tears of joy]
3150	It is time to uninstall the b station [doge]
3154	Do you uninstall the B station, and you will send me to a big member?
3156	Isn't this dog a Jingdong?
3168	Deep experience, to buy the same takeaway for a long time, a few days after the delivery fee instantly increased, the store discount immediately reduced or even no.
3174	Get less material plane tickets and train tickets and do not kill well
3175	Only in the morning in Kuan to see a comment about big data kill familiar [doubt] in the afternoon to brush to [doubt] [doubt]
3177	Last period just with the Dharma courtyard cooperation, this period with Tmall made the right [sneer]
3184	It is tickets and hotels, not out-shopping
3189	Kill ripe?Do not exist, as long as I use three mobile phones for use can not kill me![Funny] [Funny] [Maggot _ show MOE] [Maggot _ _ Funny]
3193	Killing is ripe, and information asymmetry
3196	Three elder brother is a little timid Jingdong to buy things do not worry, first put things and shopping cart for a month, and then watch him a month's price change, basically can determine his base price, and then every time to buy more at his base price.
3199	If the website physical store is a price, where to come from these tricks?Net bought cheap naturally has side effects.
3201	Human nature ah [OK] play for 16 hours of mobile phone, rest [star eye]
3205	Thinking to me of the rising big membership prices at Station b [Smile]
3206	It made me feel the importance of preparing two mobile phones!
3207	However, 3 pairs, my roommate and I often find this, the thief terror, for example, just said and the roommate want to buy a bed table, and then open Taobao default search recommendation is the bed table...
3208	However, in the end, your "time saving" and "self-improvement" is just capital expansion from the production standard until the day of insufficient support, your "improvement" cannot catch up with the speed of inflation, you are in the trap of consumer culture and develop many problems you are drained not only capital but also your own "precious time"
3209	However, now the e-commerce activities do not cut the price, send coupons.You are not t check historical prices.[stagnate]
3210	However, most people's three views are online information online [speechless]
3212	Really kill familiar, I Taobao 88 and my mother sometimes buy things price is not the same
3213	Indeed, the last time JD bought an electric paper book results did not send the shell, buy a single shell to add dozens of pieces.I collect attention not buy, a few days receive preferential message to send shell........I seem to have asked customer service to send ~~
3214	Indeed, even half a year basically a day is all hungry. me, the beginning of a meal can even be stable about five yuan, and even occasionally can meet a few cents a meal, later to the fast holiday that few days are basically a dozen more than ten meal [tv_ frown]
3217	Last year, 618 was ready to buy a mobile phone, my classmate told me that there was a 200 volume, I looked for it for a long time but not, and then downloaded it and found it.
3218	Please finally watch the small animation of the mobile phone
3228	Who despise whom, cut the dawn [doge]
3229	Who looked down on and deleted the replay
3233	The front also see very good, behind do not agree with, although the dependence, but in fact because of a series of benefits such as convenience, this is the inevitable result of the development of high technology, it is impossible to take poor timeliness and convenience means to do other things.Human nature is inert, in order to be better lazy, in order to better survival, technology will develo…
3236	A few years ago, I was using the Huihui assistant add-in plugin, but then it seemed not easy to use, but for something else. The mobile phone is bought slowly, and the price comparison device is a good thing
3238	Data analysts and programmers in the enterprise are not studying in white for four years
3239	Riding a small motorcycle to fly you fear has not experienced the horror of Tmall fairy, at home to the family what to buy, because Tmall elf open, open Taobao at night, I recommend I want to buy
3241	In fact, this is not a problem of mobile phones, mobile phones are just the carrier of modern technology.What modern people really rely on is the rapid development of technology, but the achievements of science and technology are presented through the software and hardware of mobile phones, to ordinary people to use, to facilitate your life, but this convenience is used by businesses.Further away…
3242	In fact, what I bought the most on Pinduoduo is the game home appliances (at that time, billions of subsidies) spent about 7K to buy a monitor, ps4, set up a computer, a few game disk, really nm became abnormal
3243	In fact, two numbers can be solved, a number only to see do not to buy, a number only to buy do not to see
3245	Actually, up makes very sense.But the rich don't care about spending a few dollars more, so they don't even know that big data controls their spending
3246	Bully who, deleted in two hours before sending it [doge] [doge]
3248	After the platform reads the unique identification code of the phone, it can bind to your user portrait and make a small number without logging in
3253	Fobble like memories Taobao has been uninstalled, not necessary not down
3254	Bubble memories just from to try, the phone did not see what, the exit of the top three-page promotion on the computer changed more than half, login and change back.The phone is supposed to change the advertisement according to the video record, but I didn't anyway.
3257	Warm god Taobao to bind the ID card, the last digit of the ID card is used to distinguish between men and women [embarrassing]
3262	Your method can make big data misjudged on your purchasing power, and I am powerful, Taobao to now also do not know whether I am a male or female
3263	How did you delete Sun Yang's video, and are you not ready to respond positively
3264	Do you think you know that the business doesn't know?Many of them are Alibaba and Taobao hang together, you think the wholesale price is the normal selling price, Taobao to sell higher, buy never sell fine
3267	You say that the delivery platform is well-cooked.Logically right, but you are missing an important point, the merchant.Businesses can't get any data from Meituan.The so-called Meituan background to you data merchants is not accurate.I've been doing takeout for 5 years.Basically, I have been doing it since I just had a platform for takeout.Discount coupons themselves are shared between merchants …
3272	You have sent it out, and the big data will be updated again.Or change a routine to continue to kill.
3274	Your orders are all in someone's database, just changing your mobile phone number
3275	You are wrong, the big data is not straight at all, don't know the telecom fraud [funny smile]
3279	Well, ok, I see Taobao to see now Taobao and the browser is the same [doge]
3280	Well, online shopping like me like to buy jk or cold circle around what, the store monthly sales are small, the price is completely fixed there, it is basically impossible to kill ripe.And I don't order takeout or take a taxi.But draw a card mobile game and what can have a try.Especially King of Glory this kind, put half a year to come back, the super easy
3281	Inside, I'm in a bad mood lately and don't like crowded places, so can you please uninstall b and let me a quiet, [doge] [doge] [doge] [doge] [doge] [doge]
3282	No wonder that Taobao does not log in and do not let the search.
3283	But helpless bridge some software background secretly recording camera, said words will identify keywords, so, open b station, taobao jingdong will first push those keywords goods, now in addition to the necessary social software, other to recording camera, and, input method is also the most important, individual input method will record your words
3284	Is that dog a JD?JOY
3285	So is there big data kill big data kill?
3288	What are the other other historical price query tools?[2233 Niang _ show MOE]
3289	So what does blockchain have to do with big data?
3290	I don't believe that the dog didn't copy Jingdong
3291	Do you all know what big data killing is [doge] brother I want to know it
3292	Where can the animation of the Jingdong dog see it
3293	What is the JD dog cartoon called...
3294	So, what is big data killing familiar?
3300	Wipe out poor information, disrupt consumption habits, and most importantly, do not rely on mobile phones for everything.
3301	Obviously is Taobao kill familiar well!Jingdong is killing businesses
3302	See, so you can uninstall Station B.
3303	See, this will uninstall the b station
3306	What evil eyes can cats have er reply @ Ice _ Blue: Yes.Historical prices only show the direct price adjustment, and the coupon price adjustment does not show it.
3308	In the face of big data killing, in fact, you can give more bad comments [hot word series _ harm] [hot word series _ has internal flavor]
3309	Meituan was hot search yesterday because of this big data
3310	Meituan fixed hotel understanding, no coupons, no members, six people login can have six prices at the same time, with MeituanBB 1 small program login can have 12 prices, absolutely [stay] blatant price discrimination did not discuss
3311	Every day I see the video of the teacher half Buddha, from then on I happily put down Taobao Jingdong, ye's reason (and hand) came back [doge) (order a cup of 1.8% discount, the day is endless)
3313	Mei Chiyao reply: Ali Network Security Department: dare to network attack our software?Open the door and check the water meter!
3316	No big data is also clearly kill ah, such as delivery new immediately reduced 20 yuan acquaintances are not reduced [smile]
3320	No, first rise to exaggerated contrast we have quality, and then coupons offset part of the price increase, tuhao do not need preferential, poor force rob discount to the volume to improve heat, never lose, finally you will talk about the mother's 200-100 true conscience, in fact, we all understand
3321	No use, big data kill is perfect.No matter how much is slaughtered, just like one thing, you see the price is 539, and others see is 519, the difference of 10 yuan can not see.Also shop around?You're getting nothing better than 10,000, because all you see is recommended based on your crowd portraits.
3328	Cat's eyes is a real cow force, three mobile phones in the same movie, three prices
3332	Ma Huateng / Ding Lei: Hello, low krypton player, I'm your forced krypton person.
3335	Overland, three phones
3341	Two Taobao numbers, one for my mother.She shared the goods with me and asked me to buy them for her, she is 50 I want 65 [spit] I this is the 88vip of two drills.Taobao really has yours
3342	Two Ele. me accounts, the same way to draw red envelopes, one is 30-5 and the other is 35-5
3344	For example, mattian eyelash clip Taobao, Pinduoduo is 4 fast, one, 1688 a 3 fast, I just bought one [tears of joy]
3348	What does Lao Si think, order takeout with red envelopes, businesses will give less amount of food behavior?
3349	As soon as Lao Si arrived at the store, all the people drinking looked at him laughing, and some cried, " Lao Si, you go to do the video again!"He did not answer, said to the cabinet," trouble pay attention to forward, one key three times."Then discharged nine pieces of money.They deliberately shouted, "You must be stirring the flames," she said with open eyes, "how are you so clean...." " What i…
3360	Hey, what video did you delete, I have a clip in your favorite that is invalid, and I forget what it is.
3374	A product because of a person will certainly not increase in price, will judge the market situation through big data, larger businesses will certainly have a big data chain, even if the self-employed households will adjust according to the network market situation, in addition to some really can not do business will honestly open a shop to do ordinary business.Say is big data kill familiar actual…
3376	You can take a look at the root cause of this [history of human evolution], what is the evolutionary history of thinking tools
3381	After watching the video, the knowledge of ordering takeout has increased again??[doge] White whoring also enhanced [doge]
3387	I was killed by Ele. me before I remembered it.I am often order take-out, and then often charge members, the result is a period of time hungry me has been sent a big red envelope, people around me have only I don't, then I didn't think why may be luck, the more think wrong, then I told customer service said my dissatisfaction, there is that kind of red envelope behind me...
3388	Seeing big data, why did I first think of is talking about bookkeeping, this software simply don't know people too much [tears of joy] [tears of joy]
3389	Look down on who, only so early, deleted, a few years later to post [doge] [doge] [doge]
3390	What is the animation of Jingdong that dog called at the beginning [chicken leg]
3395	At present, what big data really corresponds to giant pineapple is a vicious strategy in the service industry, reducing the basic knowledge of users, making it impetuous and narrow, so as to improve the stickiness and dependence
3396	Of course, the giant pineapple only has the same problem, but the capital barriers will be higher
3402	Often be killed by Jingdong big data familiar.But I have many eyes, 7 days, 30 days there is a price difference.Electronic products can return 20 price difference, buy a washing machine can refund 60 yuan.After buying products, you often pay attention to the real-time product price, and take a look at the price reduction to quickly refund the price difference.
3406	Jingdong bought is some often buy the price increase I am very clear!Nothing to go to large shopping malls, rice and noodles what Jingdong is not so easy to pit my takeaway is also [funny] sometimes I will go to the actual store Chou Chou!Often order is some eaten stores!Hotel ah train ticket is even more difficult to kill the familiar!Like the same day a day is a price two days secretly add so a…
3407	JD big data has been able to see everyone in the family wifi as the whole collection, and it is useless to take the parents' mobile phone
3412	I have a video that is to check the price
3413	Solving the challenges of technology development cannot be solved by refusing or reducing the use, which is a regressive behavior, as to how to solve them, emmmm...Who knows that [kneeling down]
3414	Save you precious 7 minutes time mobile game offinstall reinstall / interval time not disguised as returning to the user shopping website and others compare price judgment takeaway class: no solution disrupt consumption habits / erase information difference
3415	Anxiety traffickers, report it.
3417	Simply put, because Apple Hui draws 30%, so to ensure profits, those games or software manufacturers will graft that part of the cost to users, which should not be data killing
3420	If you put a thing in a shopping cart for a long time... looking at the prices up and down, you know how much this thing is right [eat melon] one said one day the official cat store has some real pit
3421	Since the big data can be used by the sellers to kill the familiar, of course, it can also be used to kill the sellers, you can use all kinds of historical price query tools and "what is worth buying" this app oh
3422	Remember last year want to buy a box of jujube walnut in cat super, but not full 88, to postage, just roommate also want to buy things in cat super, I want her to help me to buy, save postage, but the link to her found the same thing, she is more expensive than mine...She is an iPhone, I am a vivo phone...
3430	Flowers who see to prevent being killed by takeout, I call the application tube hungry beauty [doge]
3432	Red envelope less than 5 yuan do not buy, the price of 20 do not buy, as if you have earned, eating a hot bag sense of achievement suddenly got up
3433	Very simple, big data data talk, you as long as provide wrong data is not good [nose]
3436	And spring gauze mist husband Taobao every day to push me the girl pajamas, underwear, silk stockings, swimsuit, may take me as the child her mother
3438	Good pig was cabbage arch reply @Deer Shanghai fir: recommended wisdom line, I always use it to set a hotel, cheaper than the beauty group [yi teeth] [yi teeth]
3439	Well, I know, delete it.[tv_doge]
3441	Well, I will go to unload Meituan right now
3445	Collect the capitalist wool?Did I float?[sinister smile]
3446	And the travel app said,...
3447	Or Pinduoduo is more real
3449	I'm a big data programmer..., and I'll go back to update the code
3451	Hahaha, order half a year [OK]
3452	Haha, I also have no discount volume and do not buy the series.
3455	Man Jun Ele. me is cheaper
3459	The majority of working people and Yi was exploited by capitalism, and have no resistance.
3462	The point is to spend a lot of time for the point of price difference really feel very bad, not so much time.Maybe I should be a leek
3463	The key is that big data knows who and who is related
3466	No wonder it has not used Meituan for a few months, today put back to open a member only 5 yuan.
3468	Shopping app is really scary Pinduoduo, now there is a function called spell friends circle inside, it will! What you have purchased is sent to the circle synchronously. In addition to the special private things, will not synchronize other bought things will be seen to friends, although the premise said, to the mobile phone number to add friends to agree.But this also clearly takes advantage of s…
3475	Gan, just watching the short film, you know without listening to a takeaway
3479	It feels like the company should not have the right to use the data
3484	There are many very silly fish, such as banning all positioning rights, front camera like me electric tape on the screen, 24 hours global tor agent, the page open as far as possible, set automatic cleaning cookie.This (all effective, one by one)
3485	Put in the cart and click to remind me.OK
3487	It's easy for you to use your parents' child and wife's account for what you buy
3488	Anyway, after I buy something, I will send screenshots of the order price of the order I buy.The two days ago Peak state that price messy cheap 340 hand, expensive more than 400.Take the.
3489	Anyway, you often point low price goods and don't buy, people will think you are a team price is very sensitive user, will push you discounted things next time
3491	Anti-kill big data
3494	Ele. me gives red envelopes every day, but as a result, in Meituan, some same stores without red envelopes in BBB 1 are cheaper than Ele. me uses red envelopes [2233 Niang _ Khan]
3496	The forehead is all I play the rest of the king offinstall for 1 year, or smoke what what missed
3498	Multiple accounts are switching to use
3500	The best way to deal with big data killing and practice is the basic knowledge....Because big data kill ripe for a few dollars is actually very lost...Actually is big head is a variety of fast sales, such as push you planned elimination of electronic products brand, and then only repair not, but the cost is in the price, selling service, in other words, the product is actually very garbage, once …
3501	Broken network to play a game, and then on Taobao is this game around
3502	Poison collection of shoes after the period of full price cancellation after a short period of time to return to the original price is too disgusting
3510	Is the dog in the animation the Jingdong one?[doge]
3512	Understand, so just uninstall Station B
3513	Understand, now start to white piao up master video, reduce the data of my portrait analysis
3515	Understand, immediately follow the big data line
3521	Computer end does not log in to see, optimistic about the mobile phone end order
3524	Didi kill cooked too hard, and then I used Alipay's AutoNavi took a taxi.
3525	Didi and Meituan are the worst thing when being killed
3526	Didi taxi to kill ripe how to break?Buy your own car
3531	At that time, the Onmyoji just opened a suit to play for a year to see the black uninstall yesterday came back to dozens of smoke on a sr [laugh]
3532	But manually collecting information is really tired like I want to find a game of mouth copy NGA review video for comprehensive sites to see the game after sure I want to play to taobao to find a similar order this operation down how also to two hours this is idle nothing can do like the video said takeaway I am usually in lunch time so in my case of hungry and to consider taste hygiene and shop …
3534	But I have to say that the benefits of big data may be higher but not much.More you can not be rich less you can not poor platform kill pig is impossible (I haven't seen anyway)
3536	Big data made me speechless most- -I accidentally paid attention to Dulax at JD and didn't know it at that time. Later, when I saw men's health care and other products in my shopping cart, then I paid attention to Dulax.After unattention, also blocked those things.No use, however.There are still those health care products [speechless] [speechless] [speechless]
3537	Big Data Professional Passed By [OK]
3538	Big data kill earliest I remember should be Ctrip, takeout can eat less, Taobao Jingdong can also buy less, but go out of the ticket hotel that is really just need, go out to do affairs, do not spend that money is not ah
3539	Big data kill the most obvious is that netease cloud can not listen to the song, or the day push pill [doge]
3540	Big data killing is actually the same goods, different people buy different prices, the purpose is to increase the profits of businesses.
3541	Big data killing itself is avoided, this is not a normal phenomenon.It is a perfect trick used by a few capitalists to plunder the capital.But this is actually a kind of black box trade, where the platform provides you with quality service every day, and you unconsciously pay more money.
3542	Big data kill familiar?As long as the data given it is Schrodinger's cat, there is it to solve the Schrodinger equation.By the way, Heisenberg.
3543	Big data to kill the poor [doge] [doge] [doge]
3544	Big data allowed me to see your video
3545	Big data and artificial intelligence if it is a degree to do you can't see any negative news about a degree you love a movie in a letter to buy tickets will have no preferential you love to eat food will not see the red envelope discount volume even you visit a treasure east find low prices you travel to buy ticket tickets is original price or even high price news will not push any about merchant…
3546	Big data is also being monitored
3547	Big data (algorithm technology) kill familiar, because too understand, so kill up, seemingly invisible is actually what (see the knife while the heat).
3554	Has never ordered takeout passing by [laugh and cry]
3555	From a legal point of view, merchants use big data to kill and violates two laws and regulations. One is to collect users' personal information through big data and violate user privacy.Second, different users spend different money to buy the same goods, but without any explanation, the violation of users' right to know
3558	CC has previously stolen information, although the official has denied the rumor.But it still feels from the power of the data
3559	CC, put it in the cart, red envelope, order it in, get??
3562	Chi Ying replied to @PSP live football: suspect that Tencent will share chat information, often WeChat chat what will find ads in different corners
3568	Normally, you can try the cat's eye or the app of the ticket, the price difference between login and not landing in the account
3570	If you check the price fluctuations, you recommend meow meow folding.Not about advertising.
3572	Goshawk 009 ok, but shi corner has limited, only from using (nest) account, platform and service provider difficulties are not involved, and android platform can go to cool place try to learn to make claw, personal learning is can get most of the mobile end block most permission calls, camouflage positioning, etc..., (although the network is relatively exposed) —— proposed some partial ideas, ent…
3573	I don't know if I have read the intellectual brain said in the novel, just a terminal that can assist the human brain to process information.Before just read a novel that will but very envy can have such a thing, to know what information, processing what information to the intellectual brain processing is, the human brain to make the final decision.Mobile phone this thing is the prototype of the …
3576	Don t say don t say l I also want to say that the big data on station b is a bit awesome....I had never seen a hair dye video before, and then I came back to station b after a search for the flower king hair dye, and the hair dye video appeared... [smile]
3577	Don't push the evil of capitalists into technology. What's wrong with the popularity of smartphones?Isn't it platform makers but mobile phones that rely on unequal information to extract user value?
3579	Not that we rely on the mobile phone, but that the unit will gradually stipulate that we must download and use WeChat, nail, health code!
3580	It is not that we control the data, but that the data control us.
3581	Don't buy takeout.[tv_doge][tv_doge]
3598	Ask, what has to do with big data and novels?
3599	Without ordering takeout, go out to eat cash settlement without using membership and e-coupons, clothes and shoes will buy those brands
3601	No takeout [tears of joy]
3606	Ice _ blue seems that now the network business platform will not directly adjust the price, too obvious, is generally to adjust coupons, such as a commodity engaged in activities to send coupons, some people are 10 pieces, others kill ripe change 5 pieces, I have encountered such a thing
3608	After all, I buy nothing. He can't kill me with big data
3609	Throw your phone fishing when necessary.
3610	More than preventing big data killing, it is more important to improve your value as soon as possible.If one day your time is worth more than money, there's no need to waste time shopping around, collecting coupons, and disrupt spending time to avoid killing it.Make more money with this effort [smile]
3612	Price comparison software is too zz
3613	Facing various combinations of preferential history is not the lowest price, let to mention the black number of shopping platforms
3614	Price comparison software
3620	A material, jingdong proprietary display, EW2770QZ, there are two shopping pages, a price 1999, a price 3299, when I asked jingdong customer service, they said temporary adjustment, the price for half a year, 3299 price is still there, display recommended now push 3299, clearly and price 1999 is exactly the same thing!
3621	Sorry, at first glance as the big data of how to kill the chicken [laugh and cry]
3623	Halfway to see the jingdong icon hair raised a paw [wonderful ah]
3624	Half useless Pinduoduo gave me a full 50.1 minus 50 coupon yesterday [doge]
3634	According to the up theory, should we have to change our Internet habits to prevent big data?I'd recommend you the simplest and most straightforward way to install ghostery or disconnect, or any other anti-tracking plug-ins (privacy badger, uMatrix, uBlock origin, adblock plus, etc.) that prevent tracking, advertising, increase web speed, and reverse tracking to find data dealer information.The c…
3635	Never buy from an honest person who will save 100% [doge]
3637	Alas jd eavesdrop microphone then recommend commodity how to break?Disable permissions?
3644	??I don't buy it at all
3647	Yan Love 88vip gives you $88 more a month
3648	yangmqglobe reply @ Next season: Taobao those private sellers have no data
3649	Xbsjbbdvhxh replies to the @ bubble memory: The phone records the machine code.As if the trial software expires, you uninstall the reinstall or the trial is expired
3651	wn.The run /, Taobao and Jingdong, take it away
3652	vilairis tells you that not only members are different from non-members, but also between members and members. In the past two days ago, facial members, members and non-members have three prices [smile] of which two members' mobile phones have different prices
3653	Viando slot [stay] I want to buy a cheap cell phone
3654	The final worry of the up and the contrast of the barrage made me feel somewhat heart-wrenching.The emergence of mobile phones and the Internet makes life more convenient. We want to get a data by moving our fingers, and to talk to a friend thousands of miles apart can only make a phone call, which are brought by the progress of technology.But at the same time, as the old saying "technology is a …
3659	The up think too much, all kinds of app can only serve me, I am the master of the [doge] not the various conspiracy theories day by day
3660	The up completely puts aside the efficiency and convenience brought by the platform, and I do not know what to express from the perspective of business benefit alone?Originally a win-win thing, Leng is said to have a taste of conspiracy theory.Back to the message block, no mobile phone, no platform can kill you, you are comfortable?moan and groan without being ill?In the second half of the video,…
3663	UP your information cocoon room is wrong ~ your concept should be a mimicry environment
3664	Hello up, what is the jingdong dog cartoon?Really want to see [cry] [cry] [cry]
3667	Comparing the price on the hotel's official website, sometimes the price on the hotel's official website is cheaper than that on these app's
3670	San_3 only with magic to overcome magic, through the program of irregular random search, transport far more than their useless data to hide their true intention, and then use another account to buy, it is possible to avoid, at that time, is the cheating algorithm and recommendation algorithm, cheat algorithm can lead advantage [tv_doge]
3672	robbie6666, however, real capitalism, will be the whole price.Just find a low price, and sell it at the same price.
3677	MrBanana this honor reply @ helpless helpless bridge: horse oil is really no privacy
3680	InfiniTwo Tmall was found to have different prices between new and new users, and then bug changed
3683	I study big data in emm
3685	Deer on the fir really...I just usually use Meituan, so what is better to use?
3687	The Creeper_OS mobile phone is the su-motorcycle of our world?Can it be said
3698	Would ACG's Institute of Chemistry of the Chinese Academy of Sciences pull capitalist wool?[doge][doge]
3719	[dislike] I am a big data killer, should be what I need I don't even know, I need everything but do not need anything [OK] [OK]
3728	[Maggot sound niang _ eat melon masses] into the shopping cart exit is me, this is good, wow delivery fee is very expensive, I think again [maggot sound niang _ surprised] this is me [maggot sound niang _ help forehead]
3729	[Hot eyes] too outrageous my boyfriend and I in Taobao search yu hua's book results of the same book his side four more than twenty my side three sixty also want 20 I see silly
3730	[Hot eyes] Ele. me to eat in a store for several months, more and more expensive
3732	[Eat melon] Yes, you also recommend it to big data for me
3733	[Eat melon] from time to time to draw a big red envelope mystery solved, anyway, I am more than 20 will not point, the same dish first to see whether other businesses are more preferential, and how to point more preferential anyway, research for a while will choose a favorite preferential order.[OK] Sometimes when I see that the final price is not 10 yuan, and I will deliberately point to 10 yuan…
3737	[OK] often search for the family want to buy, and then simply look at the price to see what, now Jingdong Taobao I into the home page what strange are pushing to me
3739	[doge] Just search for olay and Taobao will recommend xz endorsement products to you and then save money [oh call]
3740	As [doge] has learned, this unloads Station B
3742	[doge] Didi some time ago there is a trick, the same journey (non-peak) my car price is a little higher, a friend called cheaper than me, think to go... the reason is probably mobile phone, my Apple her is ordinary Android machine [wonderful]
3751	Last night to join a shopping cart of goods, just ordered to see the expensive 40 yuan
3752	Yesterday came back from the railway station, directly on the Cao Cao special car 47.9 yuan.Today, I went to the railway station and invited Cao Cao on the platform. A discount of 10 yuan was 56 yuan.
3753	The best way is to cancel these bad conscience
3754	Since changing its new mobile phone, Jingdong Mall has not installed its mobile phone again. Recently, Jingdong has often sent text messages saying to send the phone fee. If I want me to download it, I ignore it
3765	The consumption environment of Chinese consumers is extremely bad, all kinds of routines to guard against!The blatant induced type of consumption is grand, actually no one tube!
3768	This phenomenon is impossible to prevent, it is best to use less, or use to walk between the platforms, always do not do "familiar customers".Buy things, put in the "shopping cart", do not check out, wait for a period of time, let the "platform" guess what you want, platform will constantly recommend similar goods to you, continue to observe price changes, continue to shop around, I usually pay a…
3769	This is not break the law, clear price of things, the business by the ability to make money.It is common sense to shop around, too expensive can not buy.
3771	This is a by-product of technological progress, no way, but to accept.
3773	This must use the power of the relevant national departments, individual consumers are really unable to resist!
3774	This is under the control of the government.All APP have to read the user's information, including the address book, photo album, call, you think of, he has to get.I read a calendar, weather forecast and read too.Feel by APP picked a trace, too rogue!
3775	This should not be called kill ripe, the platforms have different discounts for new users
3778	In Beijing, taking a taxi, I first hit a car with Didi to sit for 21 yuan. Because I could not sit, I hit another car with Meituan. I chose the highest 23 yuan, but a car reached 57 yuan before it reached its destination
3780	Have a move.I am just Pinduoduo.This is done.Is what you always look at what you want.Just don't order, have to browse to the very low price.You'll just place an order for it.My is pushing me cheap, because according to my previous consumption data.I really don't order
3781	If there is goods, there is killing.
3785	With the legislation, the regulatory authorities should actively follow up
3786	People who use Apple phones generally have higher consumption power, a little higher price, and can provide quality services.I don't understand how people with old Huawei phones cost more than people with an iPhone!Is a drop helping others fight Huawei?
3787	The platform should be heavily punished, investigated for the crime of executive fraud, and the actual control of fraud!
3791	It's time to rectify Internet big data. When he buys things or looks on Taobao, he will push them to the headlines
3792	To be like a shopping mall, a thing a price, clearly marked price, shall not change at will, discount promotion prescribed time and date, the platform voluntarily participate, not the prescribed time shall not change!
3794	Ctrip go where to kill ripe that call a fierce
3795	Ctrip set a room, order more than 400, can not be cancelled.A few days later into more than 300, to the scene, the family front desk price is more than 200.Uninstall is never used
3796	Ctrip booked a plane ticket encountered, come back to know that this is called big data kill familiar
3797	Xiaomi phone, can authorize you permission, but the return can be empty
3799	Online "big data killing" and the offline bamboo bar have the same thing.Compared to the simple and rough behavior of face to face sitting starting price and extortion, "big data kill familiar" is more "kill" people in the invisible.
3800	Now some commodity models are only for online sales, want to compare prices can not compare
3801	Now Jingdong, do not login do not let browse goods
3803	I bought some chips and shrimp strips in Pinduoduo, and then in those days, an ad quick quiz always appeared in my recommendation, saying that I like some kind of snack
3805	I buy a tablet with my computer to buy a tablet on my phone is a 100 yuan difference
3807	I am a member of Jingdong plus. Last time my friend asked Gang to buy a hard drive, I said whether I am a member would be cheaper. As a result, the offer of plus member is dozens of yuan more expensive than my friend's ordinary member
3808	I have encountered the price repeatedly, just began to browse a price, after the customer service to return is a price, and for other browsing, back to see is a price, never offline, it seems to see to change the price for three or four times, a special edition of the anniversary activity event, when there were encountered this situation of friends?
3809	When did the 5G and big data we vigorously developed become a tool to "kill mature"?
3810	I'm just, and I will compare a few platforms!Although I buy more things in Pinduoduo, the price for me is lower than others!
3812	I just finished checking the big data to kill ripe to see this, was killed again!
3814	I often buy things in a certain east, can not find good quality and cheap, kill ripe serious!Support burst light!We will support strong regulation!
3815	The title of the article should be changed to: detailed big data killing and how to fight killing.
3818	Why uninstall?Didn't he have a hotel phone on him?You use him as a tool man, use it to understand the hotel environment, service, price, and then call to book directly, no middleman to make the difference
3821	Register several more platforms for the same category, don't only use one.With the same platform used twice, you will receive unexpected coupons from the platform.
3822	Book air tickets and hotels in advance, the second time to see the price, do not book and price, you book and then see, the price this is my experience
3823	The search item on Taobao must log in first
3824	Taobao bought a product to try the water, feel easy to use to continue to buy, and then found that the price rise
3828	So, now you want to compare online and offline
3829	The so-called Internet thinking, those touted of unadded high-tech or algorithms, in fact, is just advanced thick dark learning, with data mining human weakness, to put it bluntly, is an invisible psychological war.
3835	In the final analysis, there are too many permissions on the platform. You can store your information to browse at will. You usually push you to put it bluntly, it is infringement
3836	In the end, there is still less competition.The platform first spent money on various subsidies to kill other competitors.Then eat the seller eat the buyer, in the final analysis the essence is the intermediary, but grab the biggest interest...
3837	Data analysis for evil, the boss, the product, the development together for evil,
3838	Time and space chain will not kill familiar, each supplier has a phone number, you can call the supplier agreement price.
3841	Only by making good use of the power of the rule of law can Internet platforms make good use of big data and stimulate the momentum of science and technology, so that consumers are exempted from being "calculated" by algorithms, so that algorithms can better serve consumers.
3844	Killing ripe positioning price fraud, the suggestion stipulates that the punishment for the platform is not less than 10 million yuan, the punishment for the merchants is not less than 50 0,000 yuan, and the reward for the informant is not less than 100,000 yuan.
3846	If they want to, so we will give up on them together!Give up the network!Cancel attention, cancel members, everyone does this is to burn the bottom, the platform will realize their fault!
3848	Lack of regulation, to be out of control
3849	Where to book the hotel online, place the order when I am required to authorize the address book to give 1744 preferential price, otherwise it is 2044 yuan a night, no lower limit!
3850	Qunar is more serious, two prices in a minute, and two breakfast.
3852	Experienced personally kill ripe, Taobao take a fancy to a product, send his wife to help me reference, the wife saw said how the price is not the same?At that time, I sent me the screenshot, and I cancelled the order and asked my wife to help me buy it for me
3853	Ordinary consumers will have a very strong sense of weakness in the face of big data killing: unable to find, unable to avoid, unable to protect their rights.Ordinary people even feel a fear of the two sides brought by the development of technology.
3859	Pinduoduo, I observe a small thing, the first time is more than 2 pieces, 3 pieces, also expensive; after two days to see this price, are 4 yuan, 5 yuan start; and then two days after 7 yuan, 9 yuan start.I ha ha, Lao Tzu will see you play, do not return to the first price, do not buy
3860	Pinduoduo, which I was directly unloaded.Sswear never again!
3861	Struggle more is a low price to attract you to buy the actual price is higher than the propaganda you see.
3863	No wonder that foreign countries do not welcome these domestic platforms, big data killing, the disclosure of personal information and privacy.
3864	I am a plus member, the price is always higher than my wife's, because she always has coupons.Call to complain, to say that the coupons are random (zha didn't see the other turn of the time), and then ask me to order, to fill the equivalent of the beans, make boring
3865	Meituan to buy food is, I have bought things just received goods, ready to order again, found that the price has gone up!It's not fresh food, but fan seasoning, which itself is not a price a day.
3866	Is there no department management?It's not been around for a while
3869	Buy twice, uninstall, change a, after a period of time to reinstall, and calculate a new user, I buy food so operation, otherwise buy buy expensive, more expensive than going to the vegetable market
3870	The platform to buy food is also, new users have a variety of coupons, the users are very few old
3873	Old husband eyes all see the flower, just understand, you this is to want to cheat me in buying a mobile phone, two price comparison to play
3875	After reading these, I think of a sentence, those big people who build the online shopping platform, why not call them entrepreneurs, but called capitalists!Then you will understand what they have done.
3878	See, be blown out of the big data, in our here is used to "kill ripe".
3879	Open a special complaint small program, special exposure of bad platform
3882	On Jingdong, the same product, the same details page, different businesses, for different prices to sell..The price difference is between 4-10 times.
3885	Jingdong, the price of my plus is much more expensive than my husband's mobile phone.indignant
3889	The country should formulate a policy, two users login at the same time, there is killing divided by the fine, the customer free on the line.
3890	National laws directly sanction big data management and management from the source
3892	No wonder between the social acquaintances and acquaintances are more and more strange, the original is the disaster caused by big data!When the design of big data kill, by-product is human is more and more worthless.
3894	Anti-kill is using an Apple phone, Apple does not allow APP tracking, and the Apple Internet is constantly changing MAC addresses by default.There's no way to kill.
3895	Shaled a lot, a point is not.When GPS is usually closed, all e-commerce platforms will not give GPS permission.
3896	Look at several more platforms,
3898	Killing should be heavy punishment until its bankruptcy is too hateful. In addition, the use of big data should be more strictly regulated to strictly prevent abuse
3902	Didi Taxi has ever met it before
3904	Indeed, I saw a brand of cosmetics in Jingdong and sent the link to my husband, as the result, he saw the price was 10 yuan lower than me!
3905	Big data may become an important tool for fraudsters, which really does not advocate civil use.
3906	Big data was used to steal the dog!When can we not play this kind of smart, do something smart things!
3907	Big data is not for serving life.But for the familiarity and accurate push of advertising!Our company also wants to learn the big American company a little ambition!Do high-tech AI on space what, always selling vegetables to kill cooked ambition low point!
3908	Big data is being played with bad!This is very efficient to teach students for individual students in accordance with their aptitude, which can play a synergistic role in national construction and national optimization.Unfortunately, to the hands of unscrupulous businessmen has become a crisis of social trust!
3909	Big data is the progress of The Times, but it has begun to gradually abuse it. You should mention your big data information anything. As soon as you pick up the mobile phone background, you do not know how many app there are checking their own big data. It is how difficult for people to provide evidence by themselves.
3910	Fight monopoly, more use of other platforms, this move can be solved!On the contrary, Ren Zai Zhi!
3915	Should not consumer to check, should be irregularly checked by the supervision department, once found with ten thousand, this is the way.
3920	@ Didi Chuxing you are too unkind!Decisitively choose Meituan taxi!Have tried the same price about a fifth from the distance!!
3921	@315 Consumption @ Central Political and Legal Committee Changan Jian @ People's Daily @CCTV4 Today, follow @ Xinhua News Agency @ China Youth Daily @ Supreme People's Procuratorate @ Supreme People's Court @ Network Security Bureau of the Ministry of Public Security @ Southern Metropolis Daily
3923	Yesterday hungry to order a chicken, two mobile phones to choose the same thing, the difference of 3 pieces ~
3924	The latest science and technology must be the capital in the first place to serve its own interests.As long as it is a variety of new word phenomena, we must be careful.There are very few win-win things, most of the pit.For example: after the online registration, seemingly need no patients line up, in fact is the hospital saves a large part of the labor cost, and as the majority of the elderly pa…
3929	This is the nature of capitalists, which requires regulation
3973	Special non-stop registration telephone small and then can enjoy more preferential, with a period of time, after the cancellation to apply for a, raise a small is much cheaper than big data kill ripe.
3983	The same is true for China Telecom. I have used telecom for 12 years, 239 per month, mobile phone traffic 1G, broadband 100M, 600 minutes of call.New users open an account, 89 yuan has this treatment, and the mobile phone traffic is 5G.I silently pulled out the telecom card out of the phone and threw it into the toilet, and threw the light cat into the trash can.Then I got a mobile card, 59 month…
3984	At least two mobile phones
3987	The companies that support big data are giants. For example, I saw a razor on Taobao. In the next few days, I can see this razor advertisement in various APP, a company you can't offend
3988	Normal online booking prices are much cheaper than the public hotel price.
3989	I really didn't think of this routine!Big data, it seems that is accurate ripping off customers meaning.Through thousands of roads, or can not go out of other people's routine.
3990	I really didn't think of this routine!Big data, it seems that is accurate ripping off customers meaning.Through thousands of roads, but never want to get out of other people's routine!
3991	This phenomenon is very common, the use of poor information to collect improper fees, in the face of this situation can report to the market supervision bureau complaints, and to the TV station or news station submission report, so that the people are supervision and the business dare to do so?
3992	This kind of killing behavior is very shameless, but let consumers have no door to complain!The simple truth is that the higher my membership level, I should enjoy the most favorable price!In fact, the platform is to slowly cultivate non-member concessions into members, and then, start to kill familiar!
3993	This situation has long been discovered.The same goods, different account search, to the price, activities are different.Because big data according to our consumption habits, give us a like, high, tendency, consumption ability... for example, a plate of fried screws, sell Zhang three 12 yuan, sell Li four 16 yuan, feel not very obvious, also acceptable, but the high price is 33% more expensive th…
3999	These days, there are too many hidden rules, play a Didi, the price difference between Huawei and Apple is nearly more than half the expensive who pass, the country should not allow such a thing...
4001	So said that the last time to buy a crab Jingdong is also with my daughter-in-law to see the price is different
4005	This is called information leakage, to be a heavy punishment
4007	This should be available on next year's CCTV 315 consumption party
4008	This is true, I experience it.In the same hotel, booking in Ctrip colleagues (non-members) is more than 100 yuan cheaper than my gold medal member booking. I do not log in, whether in the desktop or mobile phone, the results are the same.It can only be said that now the market is in urgent need of rectification, Ctrip, Qunar, Yilong are the same.
4011	This is not easy to say, billions of subsidies and not after billions of subsidies page price is not the same
4014	Isn't this a price fraud?You are not clearly marked price, you are to see people next dish, ancient this kind of behavior is called black shop!
4015	This is not the ancient times to sell people exist things, see people say people say ghosts, see people eat, good talk the price is high, not talk to earn less to sell.
4017	It's not big data killing, it's price fraud.
4019	Looking for a spa hotel, APP on 320, I call directly past 180
4022	I have long been finding this problem, including a lot of online shopping.When the online inquiry is to use other account search first, and then use their own account comparison to purchase.
4023	Long found that my daughter-in-law and I used a treasure to search the same thing, the result of the price of the goods is greatly different.
4026	On Ctrip is also in consumer fraud, a train ticket is about a third more expensive than on the railway official account, found that since no longer use Ctrip
4027	After I booked several tickets on WeChat, the price was much more expensive than other platforms that had not booked tickets
4028	Where you go to, to book a plane ticket is to kill regular customers.It's so hard!
4029	In the era of big data flood, it is just another advanced weapon in the hands of the strong, more convenient and fast
4032	It turns out that big data works like this...
4033	Originally thought that the arrival of the Internet and other technologies will make the information more transparent, now it is the more increased the information asymmetry, originally you may still know that you have been killed, you have no perception in the future, ah, try to move bricks
4034	Encounter, the complaint is fruitless
4035	Or is the order to prohibit such a company from building a database, the harmful database does not need to exist
4039	Buy a plane ticket with WeChat, if you watch the same flight for several days, you will see the price increase and the later date.
4040	Qunar is cheaper than Meituan, but there are more types of Meituan than Qunar, such as e-ports rooms
4042	Do you try it again with a domestic mobile phone and an iPhone?There are also surprises waiting for oh
4043	Should be governance
4044	Music platform kill is serious, originally a vip can listen to music, listen to more into vip, change a phone without vip to listen to
4045	Music play software of the same song, the new users listen to the complete, the old users need to pay to listen to, almost all of the app is this virtue
4050	Mobile company big data kill familiar is the most obvious, know that your number will not change, the phone fee is relatively high, unless you change the number, otherwise change the package is useless
4051	Don't blame Americans for taking our privacy either
4052	To die, my family has been out to travel only use where to go, the original so black ah!!!unload!
4053	Or very little money, a price war every day
4054	Otherwise, what's the use of big data
4058	After you uninstall, your mobile phone number, name and provincial certificate information is still in the big data
4061	Ctrip is also this virtue, I have used nearly 20 years of diamond VIP fixed room is not as cheap as my wife's ordinary members
4062	Ctrip is the same. If you book a ticket, the hotel price of the destination will rise, change a mobile phone is cheap, this is kill
4065	Ctrip flew in line with airline tickets and hotels to Shenzhen on October 15
4066	Ctrip, even the hotel are familiar
4068	Small intestine Chen eat brine cooking: I drive navigation by, in Autonavi a one person set meal 31 yuan, dish bottom + fire 2 + Arctic Ocean 1 bottle, spell table a their old patron, chat that he 35 yuan dish bottom + fire 1, the old patron full of gas
4071	Now the wind is bad for Jack Ma
4072	Now download every app to view your phone information, package photos, and so on, tam this isn't a crime?Use your software to check your phone, and what has to do with using your software
4073	Now kill ripe more severe, all positioning, it is impossible to let you find that the price is different.
4074	Now many platforms are like this, especially fight Xi Xi
4075	Now all kinds of APP have used the "kill familiar" means, shared bikes, different people at different prices, the more you ride, the higher the price
4076	Now the promotion, pay attention to the price of the same product before the activity of about 20%, and then in the promotion, the result is not much cheaper than the normal price.So generally buy things online, first put the goods for a few months to see the beautiful price of that day.
4080	The system platform is thinking, since there is money to open members, we must have money, we did not open members must be poor, so we kill the rich
4081	No adultery, not business, a little good!I was killed by big data, the same thing, I buy than my wife to buy more expensive 400, there have also been things I bought love my wife bought dozens of yuan cheaper
4082	I have spent my own JD account for ten years, and everything is expensive.My wife signed up for four accounts at once, buying milk powder, 10 percent to 20 percent cheaper than my old number.Big data killing has the suspicion of illegal operation, and I hope the relevant departments will pay attention to it.
4085	I buy the account sound inside the merchant service of pay treasure, the same product, two account number, two kinds of price, the difference is 70 yuan
4086	I must add a fee for booking a train ticket on Ctrip, otherwise I will not give a ticket, but in the fast ticket network, I can pay a fee more than it
4087	I bought goods on a platform, asked my wife to have a look at the same platform, the same business, the same product, the price displayed on her mobile phone is dozens cheaper than my mobile phone (her display discount activities, I did not show, because see often buy), let her place an order.
4088	I can feel most with Didi, I don't have to change the phone to see, bought a few coupons minus 6 yuan, the price is 1 yuan from before I bought, I bought a lonely, after using less also always send me coupons
4090	I also encountered this situation, the gold card membership is not as cheap as not using the membership!
4094	I have the same Ctrip account, small program and app prices are different...
4095	My colleague's iPhone is a little more expensive than ours
4096	I downloaded several APP at the same time, the price is different, and count camels the most pit
4098	My mobile phone is different from someone else searching
4099	I was one of the people familiar with media investigations about big data,
4100	I have a deep experience, a colleague and I look at the same hotel, he see eight or nine hundred, I see only four or five hundred.I rarely go out, and she travels a lot.That could be big data.
4101	I think I can only make human intervention. I now basically register the account with my mobile phone number to buy goods, after the completion of the order, and then register again next time, anyway, I have three mobile phone numbers, take turns to use bai.
4102	I bought two lip glaze in some treasure two days ago, and my friends are to open the same link, the total amount actually believe 20 yuan!Is this a big data killing behavior?
4104	I think he should thank to which network!Where to raise the price is to bring him a huge sense of psychological superiority, let him feel the consumption of the rich.
4105	I often book a hotel, my son never book a hotel, we two book the same hotel at the same time, I am more expensive than him, kill familiar is true!
4106	I lead my data
4108	I often buy a barbecue shop in Ele. me. I often think their family tastes very appetizing, so I order it. The last time I ordered food again, I accidentally found that the price of the same thing was much higher. I thought whether this was killing, so angry that I directly cancelled the order
4109	Why want to go where to book, go to the travel agency directly ask is not sweet
4111	Why do non-members cost lower than members?This is a business into the set of marketing, we here the price is very preferential, become a member more preferential!When non-members find that the price is really good, become a member.When become a member, has successfully entered the set, the business no longer has a discount, but the price is higher.The next goal of the business is a non-member, s…
4115	Is not the advantage of buying things online is to compare prices?Each platform to compare ah!
4116	All platform members on the Internet are not open, when you open your wallet to them, you hope that they can give you the privilege to save you money, but ushered in a sharper knife and more ironic ridicule.
4118	We will improve and refine laws and regulations, and impose heavy fines and punitive fines to deceive customers
4119	Recommended Zhixing train tickets can also book a hotel
4122	The same Meituan and my daughter phone orders at the same time at the same time, the same goods, the same delivery address at the same time, I have a takeout delivery fee, my daughter didn't, although only a few yuan, why treat it differently?
4124	The same account is also familiar, no two accounts.I came across it personally.After ordering a hotel room with Ctrip, another hotel room costs 226 yuan; cancel the previous hotel room for free, and then order the other hotel room that costs 204 yuan!
4125	The same journey of travel typical kill familiar.Especially when I bought the annual membership is more expensive than no membership hotel
4126	The same journey of travel typical kill familiar.Especially when I bought the annual membership is more expensive than no membership hotel
4127	As a result, airline tickets are also familiar
4128	I heard that Apple phones are higher than Android phones, so I don't know whether they are true or not
4129	Tmall Jingdong Pinduoduo, thousands of people, city people a rural people, buy things price is different, and, the new old number is also different.
4131	Taobao is the same. My 88 members, buying things in Tmall supermarket is not as cheap as my daughter-in-law without member settlement
4132	Taobao, Tmall store
4135	Taobao is also, I often buy things in a store, to help others also buy a lot of.Once in someone else's mobile phone operation, cheaper than me, and tried a few mobile phones, are cheaper than mine.
4136	Taobao Tmall also has this situation
4137	Taobao things, not urgent use can add a shopping cart to cool for a few days, and then you will be surprised to find that Taobao will push the same cheaper goods.
4138	Taobao check-in is the same killing behavior, my two Taobao accounts are not commonly used check-in are one or two or even ten yuan of reward, often use the old account is only a few cents of reward
4139	Taobao link to share the same item, the price difference of nearly 20 yuan.Call customer service phone to complain big data kill, the other side said it is impossible to do activities are different.Then I used my friend's phone to send the link over and click it in. The price was the same in a minute, and suddenly something magic happened: automatically changing the page, the price went back to t…
4140	Too normal, the old user price is higher than the new users is basically the law
4141	It's horrible!No privacy
4142	It's terrible, big data is familiar
4144	Too rampant, with a fine of 1 billion!!!!?
4148	So I downloaded Feizhu, Ctrip, Tongcheng, Meituan and Qunar to the same hotel. I used these App to check the price and let them compete through big data in the background
4149	So I booked the hotel is very nervous to take my parents' mobile phone to check the price.Family always jokes at me that a simple thing is always complicated.As a platinum highest grade member, the vast majority are cheap, but do occasionally parental trumpets are cheaper.This is the true case.
4150	So resolutely do not open members.No matter what you buy, I advise you to leave what you want to buy three times, and never buy it once.
4151	So don't always use one piece of software
4152	Big data is big data about stealing privacy
4153	The so-called big data, the Internet, face recognition and other technologies are well used, and the society is making continuous progress. If they are used by these criminals and unscrupulous businesses, it will become a tool to grab illegal interests
4157	Send to the hot list to let more people pay attention to, let the relevant departments pay attention to, to solve the fraud injustice
4158	I unloaded Meituan four months ago, because I stayed in a hotel with my husband and booked the same room, which was cheaper than me, and immediately unloaded MeituanBB 1.
4160	In the final analysis, privacy or privacy, and why can you extract the user's personal habits and information?
4162	First of all, is the store wants to really discount members or other marketing skills, technology is to serve people, the rules of the game are always made by the store.
4166	It is time to abandon some platforms, do their own things, do not need some third party to participate in!!We refuse to be cut off!
4172	Last week at the Flying Pig Hotel, for some reasons.After two days to redecide the same, actually discount 30 ocean
4173	Last time I bought a ticket with an APP, I charged 10 yuan more, not kind.
4175	Commercial fraud is expected to be punished severely
4176	Buy nothing, eat melon
4180	Kill ripe for a long time, in 2013, Didi kill ripe, the same destination, our mobile phones show different prices, nearly 30%!How old is Meituan old?Is the shot on the number?
4181	Killing ripe has become the norm, takeout, accommodation, Didi have such a situation
4186	How to supervise the oligarchy of the national data is an urgent problem to be solved
4192	Indeed, so I use Meituan and Ele. me back and back. Either one for a long time, I will send you big red envelopes every day
4193	There is indeed this phenomenon, before in Ctrip has encountered this situation, as long as you browse several times in the background back to automatically change the quotation, the first time with your actual purchase is price has risen, the middle of a very short time
4197	Indeed, the last time my friend and I, the same hotel room type, the difference of dozens of dollars,??and so on
4198	It's very hard to refund your tickets online!I booked a ticket and communicated with them countless times, and it took me nearly half a year to return it.Later, it will uninstall, no need again.Third-party platforms seem very cheap and laborious!
4199	Where the network seems to really kill, I will often travel on business to set a hotel, so with other colleagues who don't often set a hotel only on business together, every time to stay will be more expensive.However, in fact, with the colleagues to live in the same hotel, the same date, the same room type.Because the difference amount is not much, and there is no other way, so also know was kil…
4200	Where to go is garbage, half a day in advance of the train tickets can not be returned, the customer attitude is very poor
4201	Where is not gone, several times have found that the same problem price difference is not a little bit
4202	Personal experience, Meituan
4203	We strongly require the state to strictly regulate legislation on all Internet business platforms and financial platforms!
4209	The Apple phone is more expensive than the Android phones
4211	Things you often browse are expensive
4215	Friends: must not deal with all kinds of members, refuse all kinds of App, do not to become old customers such as China Mobile, the package price has to go up, do not allow you to change lower than the current package,......Are business routines, or called the circle of powder, also known as kill ripe, the essence is the use of information asymmetry of business fraud, has reached the point of gro…
4218	If you are on Ctrip, Qunar, and repeatedly search for the plane tickets in the same place three times, you will find that it is more expensive than once, ha ha
4219	Why did you stay in the same hotel separately from your husband
4220	Do you believe, buy a ticket on the flying pig, buy the delay insurance I and my wife are completely different.I just found it out this time around
4225	Those that can afford tens of thousands of apples are of course more expensive than those with more than 1,000 phones.
4230	That price was twice as much as it was in the first few years, and now I use Pinduoduo
4233	Where are the seconds deleted.
4236	Meituan takeout. My ordering page and I is different from the price discount
4237	Meituan takeout is all cooked
4238	Meituan takeout, the same lobster restaurant I open members and friends without members' dishes and unit price, discounts are different, I at first thought I had a fafMeituanBB 1
4239	Meituan's hotel is the most nonsense, the same store, every time the price is different, the first time is the cheapest, more expensive day by day, after a period of time to see, more expensive.
4241	Meitu takeout, I have also had such a problem
4242	Make more comparison than each order
4244	No big data, choose difficulty; have big data, choose dependence; who to blame?Don't blame the big data is used as "partial", not "partial" and no "profit", who will give you to do data for free?Many things are relieved to improve self-defense and don't believe that a free lunch pie will fall from heaven.
4245	Yes, I found this problem with a flying pig!Platforms are becoming increasingly fraudulent
4249	Immediately introduce laws and regulations ah, found to kill ripe, immediately close the store seal platform, have such courage?
4251	In addition, I also want to make fun of some browser push ads, vulgar, adults don't want to see let alone the audience and minors
4252	I found out there two years ago
4258	Abuse of big data, after the endless trouble
4260	It can be said that businesses do big data is to always steal data, seize the opportunity to start the price, together with induce a variety of members to kill!
4261	Publish it, and then do the full-name boycott
4264	It seems that in the future to prepare several more mobile phone number inquiry, now the so-called high-tech big data is not used to provide people's life experience, but used to kill familiar.No wonder, I buy things, used to go to the same store, but found that the more to buy the more expensive
4265	It seems that often change the phone number is right, change the phone number to cancel the account
4267	A huge fine must be solved
4270	Is the monopoly, the game of capital just you still want to get cheap?
4272	Often use Ctrip to set a room, once with a lover's mobile phone order, only to find that the old customers are dozens of expensive
4281	Jingdong member, my daughter-in-law is not a member, did not find that the membership is more expensive.However, the price of Jingdong goods floating is too big, while a discount of 300, while the price increase, if expensive things pay attention to a period of time to buy.
4282	Jingdong member, buy their own mobile phone at the same time search, my daughter-in-law's non-member has 30 coupons, I have a member fart discount
4285	Jingdong, Ctrip, are there any more pit than these two?Kill the ripe, we are professional!
[truncated: 8,562 more rows]
