# Supplementary material for: Research on Chinese Consumers’ Attitudes Analysis of Big-Data Driven Price Discrimination Based on Machine Learning
Source: Frontiers journal article supplement (doi:10.3389/fpsyg.2021.803212), 2022-02-01
Supplement: Table_1.XLS [file Table_1.XLS]

## Sheet: 629xdjf1
ID	Comments
3	按你这个逻辑，马云哪天感冒了，买盒感冒药不得1000亿？
4	按需分配的资本主义版本??
5	本来不在实体店消费，就是因为年轻总被对方喊价，还不让讲。相当痛恨杀熟，现在订酒店都会先打电话过去问，去哪儿这样的app更是一辈子不会用了。
6	本来如我一般不会讲价的人总算觉得网购是根救命稻草，价格透明，只要你的目光能穿透P图看到底层，从2D画面还原3D维度的适度空间感，还是可以正常购物的，现在终于进化到了在哪里你都要跟人砍价的同质化阶段。
7	不会。总会有不杀熟或者杀得不太狠的平台跟杀熟平台竞争，导致后者不可能做得太过分，否则会降低竞争者的准入门槛
9	不是所有的商品都是生死攸关十万火急要的，如果真的是这样，在大数据杀熟如此严重的情况下肯定会出现足够快的二手反应系统，以略高于最低购买者的价格把货物卖给他，因为在这种情况下，这是有利可图的。
11	不太可能有这么严重，价格歧视的开端价格还是由市场需求决定的。比如说你去景区买水，岛上就只有一家商店的时候，水的价格至多达到正常的三倍。而且答主的理念有些太小看市场的调节和政府的管制。比如A店用大数据卖500一张的创口贴，那就不能有B店用大数据和博弈提前卖400一张给消费者？所以最终的价格也许会有一定的上浮，但不会那么夸张。
14	答主的设想已经不再是假想了，阿里巴巴已经把人脸识别数据用来和三个松鼠实体店达成大数据合作了。
16	大数据加互联网会迅速加剧负面效应
17	大数据杀熟，能杀掉与工业有关的吗？
18	大数据杀熟其实也是公平的，A商家的通过杀熟获取了利润，但他也变成的大数据的一部分，除非他只在自己的店里买所有生活需要的东西不于外界发生任何联系，也许他去上个公厕就要1万呢
19	当你富到成为知名的亿万富翁后，你购买商品的价格反而会变低，甚至不用花钱别人免费送你，不信的话早期有马克·吐温的《百万英镑的钞票》，当代有川普在还没当选美国总统之前去餐厅吃饭几乎很少掏钱买单。
22	对于消费者权益的维护，真的非常无力，一个企业出了这种丑闻就漫不经心随意公关一下，依然自在逍遥，爆出来的杀熟事件只是一个小小的缩影，企业道德可以说连遮羞布都懒得盖，比如渣浪，比如百度，比如京东，很多很多，承诺而不兑现扯皮的太多，无底线无诚信作恶的成本太低了
26	感觉以后会出现淘宝 代购 这种魔幻的东西
30	怪不得我天猫搜索衣服鞋子翻来覆去都只推荐那几个牌子！！
34	还有，如果那些大平台掌握衣食住行多种数据，加上偷用户的隐私数据，未来很容易对用户的性格进行分析。那些大大咧咧的用户就偷偷地宰他，那些软弱的客户就用各种歧视性条款欺负他，没什么关系和背景也没有财力的用户能宰就宰，这样的高科技你们能接受吗？
38	互联网上交易平台那么多，比实体店靠谱多了。
39	换个角度来看，大数据加大了消费者与商家的信息不对称，因此消费者是要吃亏的。
40	会不会催生新的职业，收集优惠券，代购商品，低买高卖，平衡价格？
41	价格歧视是有场景限制的，事实上创可贴这个例子并不合适， 这样下去每个人手划伤之后都会被宰， 我在旁边开一家平价药房，之前的药房很快就倒闭了。价格歧视的核心点在于为了卖出更多的货，将某种商品打折出售， 但是这种打折渠道隐蔽而繁琐， 并不会对原有顾客的选择造成影响。 明白了么，核心在于降价而不是涨价。 五星级酒店里的饮料就该卖那么贵， 但是为了多卖点扩大利润，你可以团购。原有的商务人群是不屑于团购的，多卖了一些饮料给屌丝。 你给的例子里买创可贴的小伙暴跳如雷，这只能证明了店家的大数据杀熟算法出了太差，好的算法应该是当小伙看到别人用优惠券买创可贴便宜了几百块时不屑的扫了眼那个踮着脚尖扫码的中年大叔
42	价格歧视早就存在，根本是因为穷与富的最高支付意愿不相等，把锅给大数据未免是草木皆兵了。信息革命无疑是可以带动社会巨大进步的，开始有点伤痛很正常。希望享受社会进步的好处，不愿意陪这个社会一起披荆斩棘，当代人的责任与奉献呢
44	将资本利益凌驾于人类基本生活需要之上，便是反人类。
51	可恶的是，这种事情不会出现在药店里，因为B会把创可贴低价卖给A，但会却出现在互联网上，因为没有人会去了解邻居的创可贴是多少钱网购的。互联网本来的目的是给我们信息，可是工人获取信息的能力比资本家差太多了。
52	可是按照经济学观点，如果没有信息壁垒的话（也就是这两个人都看到对方买创可贴），他们就会互相交易啊……
54	可是现在即使没有大数据，诸如机票车票之类的商品还是不同的价格呀，大数据顶多提高程度而已，把锅都推给大数据太荒谬了
59	马克思要是看到这个事儿，必然又会给资本主义多写一个原罪的事例。把牛奶倒河里都不算事儿。
60	没关系，哪一家敢这么做，就有竞争对手给他压价，送来致命打击。这也就是大家为什么那么欢迎美团对战滴滴的原因。
61	某东已经开始这么干了，自己账号和朋友账号，看到同一个商品的价格会不同。
62	你内心有一个估价底线，贵了不买就行。
64	你这思路跟大数据有个毛关系，直接标价500一视同仁不就完了，何必把后者赶出去呢？
68	莆田系的医生原来就是人肉大数据处理系统啊
69	其实在天猫的数据后台已经开始有这种类似的策略了，做为店铺运营我们可以直接把优惠券发送到长期关注店铺产品的客户手中用来吸引新的客户
70	前一个杀熟的是中关村等电脑城，看看现在的后果就知道了，如果再来一波，创业者的机会来了。
75	如果均提价10%其中分5%给商家，5%给平台呢??
76	如果每个人都能以能承受的起的价格享受需要的全部服务和商品，这是什么，这就是共产主义啊。每个人都去干自己想干的工作。只是可以遇见的未来不会达到这么理想而已。
82	实际上我发现很多平台已经这样子使用大数据了，杀熟！！
84	事实上，在这种情况下，会出现消费者间的价格平台，大家会即时发现此刻谁买东西最便宜，然后这个人就会立刻买下这个商品然后销售给其他人。搞不好在这种社会下，药店的门口就会蹲一个卖创可贴的黄牛。
85	是的，不过这种利用账户历史记录或浏览器Cookie的办法，早在十年前引起过争议，所以十年前海外浏览器普遍有了匿名浏览模式。而现在的技术则可以记录来访者的mac地址等进行唯一锁定，到大数据平台分析下，只需要人脸就可以识别了，这种价格歧视将不会只出现在互联网上。
86	是否会导致肉身tor组织的出现？导致收集数据失去意义？
90	所以我宁愿在淘宝上买，多看几家，多比几家，寻找合适价格的入手。
92	完美展现了资本主义的丑恶吃人嘴脸
94	我觉得，阿里，百度，京东的员工去医院看病，医院应当用大数据定价。马云如果心脏病要急救，怎么不得收个100亿起步？
95	我觉得那样店家会花大量力气去寻找一个愿花500块买创可贴的人，而忽视花5块买创可贴的人。毕竟你只要用大数据筛选，让前者进门，拒绝后者进门，让后者死在门外。这样，前者不会觉得不公平甘心掏出500块，后者死了你也不在意他的5块钱。这才是正确思路吧？
98	我上次看到说阿里在主攻各省的相关部门，给出一定优惠但是要求把全部医保住院治疗信息放到阿里云上。细思极恐
99	我新注册一个账号可以吗
100	我一直很反感这个大数据，我们学校还人人搞这个，真是反感，各种打着便利幌子刺探隐私
101	我有个疑问，如果这家玩大数据杀熟的企业是国资背景，怎么办？
105	下一步：控制你的精神，让你内心里产生把钱全部交给我的意愿，后果我不负责。
107	现在正在准备投资一家做人脸识别的公司，他们其中一个业务方向就是新零售，简而言之，就是 识别客户-分析客户需求-提供服务，与这个案例中所讲的逻辑差不多。技术是没有善恶的，只是在不同的人手里，或提升客户的消费体验，或为商家谋取更多利益。最让人觉得恐怖的地方在于作为整个链条中重要的一环，你却没办法分别其中哪些是善的，哪些是恶的。
109	要是价格不一样的话我绝对会投诉的
110	已经有例子了，用不同的操作系统手机 在同样的网站查询同样的商品查到的价格不同，比如iphone 查到的就比android贵。网站明码标价了，但是有价格歧视。这不是想象力丰富，这是赤裸裸的现实。
111	以后真正的杀熟不会让你发现杀熟的，大数据会自动分析你所有有可能接触到的消息渠道，包括你所有的认识的人，会给你隔离出一个完美的杀熟环境，让你根本不可能发现自己被杀熟了。
112	因为需要临时资金周转，在京东金条与招行好期待小额贷款过，发现给我的利息高过给我朋友的很多，朋友经济状况跟我差不多，仅限征信。
113	优惠商品大量买进，然后在咸鱼上平价卖出，这种事情早就发生了。
114	在天猫国际直营领了三百减四十的券，第一次购买了一瓶菲洛嘉的眼霜，299最后259到手。后来又有三百减四十活动却怎么也买不了这个眼霜，说是哪哪区没货，换成全国随便那个地方都是没货。当这个活动没了，不能用券减钱后，这个眼霜却又有货了又能买了不过是原价299。真狗币。
115	在油管看过加拿大CBS Marketplace，消费习惯不同网购得到的价格不同https://youtu.be/NZVpbwz6kPk
116	这不会发展到这一步的。一价原则在这也是成立的，同一件商品就该是相同的价格，否则就会出现套利空间，之所以现在没人套利，还是因为存在套利成本的问题。大数据杀熟的价格涨跌幅注定只能像金本位下货币价格浮动一样，只能在套利无利可图的小范围发生。除非出现禁令禁止货物在消费者之间流通，也就是强制取缔一切二手市场，而这就是字面意义上的不可能了，就算是政府出马，全力以赴也几乎不可能。
118	这个不算大数据吧
120	这个问题，不能全部甩锅给大数据，因为在物价方面不可能单单是大数据发挥作用，呢个五百块买创口贴的人也可以用十块钱从五块钱买创口贴的人手里买
121	这个在经济学上早有定论，叫价格歧视，目的就是最大限度榨干消费者的剩余价值
122	这和资本主义有啥区别
127	这实现了三种价格歧视的第一种，6666
128	这是。。。经济学上讲的价格歧视？_(:з」∠)_
132	你现在叫外卖还有几个软件？垄断以后自然要涨价，杀熟，宰猪啊，抢市场烧的那些钱你掏吗？谁吃糖谁挨打听过没
138	卸载滴滴
142	回归出租车
143	注意看价格较低那个是有优惠券的，小字写清楚了，周先生和媒体是看不清还是不理解平台发券补贴新客的日常运营优惠？
144	大数据杀熟确实存在，但是这个12公里差8块为了夺眼球也太扯了吧，我不经常用的时候偶尔用一次会送优惠券就会便宜
145	右边价格下边的小字是什么？不是优惠券什么的吗？
146	国家有关部门应该严惩这种行为，去哪和美团也有这样的问题，其它的不知道有没有
147	大数据杀熟之前不是就有报道吗
149	没错啊，同一段路，有几乎每次打车价格都不一样，而且显示价格最终结算有可能还涨价，看滴滴心情
151	互联网平台，方便用户的同时却把做生意最重要的诚信丢的一干二净。处罚能重一点吗[摊手][摊手][摊手]
152	我下车时候显示22，但app不升级不能支付宝非要我绑定银行卡，回家升级了程序以后付款价格就变成24了，教科书般的用技术作恶
154	回复@professor_Kong:花小猪是滴滴的？我吐了，怪不得
155	上周刚遇到，同一个地方，用两个手机打滴滴，往返价格差了10块
157	坐正规出租车打表计费不好吗？？
161	两地之间同样地点路程，往返价格就不一样
162	其实就是手机预算轨迹和时间不一样，这个没有办法避免，我也是做出行系统产品的
163	滴滴养了一堆小号，就是防止垄断法
165	所以不用打車軟件[允悲][允悲]
166	@滴滴出行
167	太现实了，我跟我朋友的手机同样的路线，我便宜一下，[笑cry]
168	滴滴现在对司机根本不是抽成，是打表计价的。所以司机计价从来不变，平台所谓抽成是有变化的，这样的话乘客付费就是不一样，作死就是
171	同一个手机，打同一趟路线，价格好像从来没有一样过[二哈]
175	携程，两部手机同时查一个酒店，相差10％。
177	用苹果手机接单会不会高点？
178	我想滴滴现在应该在全力对付怎么躲过二选一垄断的调查，没有永远的擦边球
179	没用过，想问一下，呼叫快车跟呼叫特惠快车有什么区别么？
184	下一个就是滴滴了！垄断企业！
185	而且如果连续两天都在同一出发地和到同一目的地，价格会更高，
187	苹果手机跟国产手机价格好像也不一样
188	好早以前就有发现苹果手机和安卓手机收费不一样。原来一直在杀熟
189	这种现象实在是太正常了，美团点餐，相同食品的价格相同，但是配送费，和打包费不同，携程去哪飞猪，酒店房型一样，不同手机价格不同，无奈了
191	滴滴：懂了，都调整到高8元的价格
193	@滴滴出行 出来解释一下
195	昨天下班回家说了句腰有点硬，回头去做个全身按摩，然后淘宝就给我推荐了个附近的全身推拿[歪嘴]
196	昨天晚上从飞猪订天坛附近的宾馆，找到个如家120标间一天，结果我纠结了下没下单一退出去立马刷新成160一天，真有你的飞猪
197	昨天头条有个二货用饿了么买烧烤，价格一致，用原价和打折红包两种支付??我觉得他有病
198	昨天买机票还和别人有差价呢，不能光爆出来不管啊
199	昨天惊喜的发现我用美团点外卖比正常买还要贵八块，我直接跟美团说拜拜了[再见]
200	昨天跟哥们聚餐，他说喝点酒，可我开了车，他信誓旦旦说待会给我叫代驾，还特地打开滴滴帮我搜了价格，55，能接受。喝完回去前在自己手机上搜，58
201	罪案不去调查订火车票、飞机票，必须去官网，第三方平台没有保证
202	最主要的不是杀熟，而是榨取剩余价值，苹果手机用户一般更有钱，商品就贵些，安卓一般没钱人在用，就便宜些。请自行研究经济学何为榨取剩余价值。
203	最早宣传大力推进大数据建设的时候我就想到了这种情况，信息泄露，数据杀熟，网络诈骗，信息欺诈。在相关技术和不成熟法律法规不完善的时候就大力推广大数据就是弊大于利
205	最离谱的一个打车平台叫享道，3公里收了40块。
206	最可怕的是我明明知道他在杀熟，我也没办法。我的选择只有买和不买
208	最近对新华社挺有好感[OK]
209	最佳解决办法:禁止软件公司获取用户信息，除了定位功能。用户信息需要经过国家管理部门，随机变换用户名，经过伪装的信息提供给其他软件公司（比如用户名改成数字加字母组合，或者一串字符串），国家管理部门存储用户真实信息。而如果用户和软件公司有投诉之类的行为，也要经过黑箱处理（国家部门），如果要上法院，再提供真实信息，反正出了法院就提供随机用户信息，防止软件公司数据杀熟
213	最好有价格网统一价格，或者是单独开展一个部门专门监管
216	最吊的是京东，你开了会员买啥都贵算上运费卷你也比人家贵，我和二个没开会员的同事对比了一下，他们买的东西百分之80都有优惠券可以领取而开了会员没有优惠券可领取，平均我比他俩贵百分之30。这样搞算不算杀熟？？？
218	走苹果账号结算的苹果才能抽成
224	自从换了苹果电脑，淘宝再也找不到便宜又好看的东西[辣眼睛]
225	资深大数据算法工程师.40k-50k.要什么道德 算就完事了[doge]
234	资本从来就不是好东西，虽然能让市场有活力，但是当资本的力量强大起来他们就会控制市场开始割韭菜。
237	准备两个手机
239	赚一百万，罚款不超过一百万甚至更高的话永远有人干[辣眼睛][辣眼睛]
240	赚了几个亿，罚款才几十万，你罚他个几亿试试看，立马杜绝了，不从根本上解决，这样的事情还会少吗
241	专家说，我出行都有人安排，我无所谓价格，我就说句公道话而已，你们别当真
248	著名仓鼠回复 @廊坊市精神病院高大夫 :行了吧 我拿ipad同一个账号办一个优酷会员六块五 拿安卓五块钱 有什么可洗的 消费苹果抽30%已经一堆视频讲了不止一次了
257	众平台：明说了 我就杀熟了你能把我咋滴！不就是罚钱吗你说个数就是。这件事吗？反正你们用户离不开我们平台。爱咋咋地[doge]
258	中午自己出去找饭店比外卖便宜吃的还好 还能运动
259	中華老獸医回复 @等雪的雪 :不错了，去年我正刷贴吧呢，牙齿有点不舒服手机锁屏当镜子照了一下，然后再往下刷就开始推荐牙科医院[无语]
260	中国最需要整治行业～互联网和金融业
262	中国人民共和国里不允许有资本家！
264	指明美团外卖，同一店家，不同手机，不同时段看见的价格不一样
268	只有我的注意力在苹果手机的屏幕上吗？[滑稽]
270	只有罚的狠，才有可能治这种问题。发现一次，罚款一年的净利润
271	只要我小号多，且不经常用，大数据就拿我没办法[doge]
275	只要我不用，他们就杀不到我，但这种情况真的很恶劣，希望能下重手，让他们碰一次就心痛10年。
277	只要法律把处罚加重就行了，比如一旦发现就关停平台。杀一儆百
282	只能用千元机的我就下了感动的泪水，真是良心企业家，人民的大数据[笑]
283	只能说新华社在民生这一块，永远滴神
284	只能说罚款太少，企业不心疼。第一50w，第二次50的二次方，第三次三次方，依次推下去看他敢不敢
285	只能靠新华社了，顶上去
286	只能怪处罚力度太弱鸡。
287	只能多用几个APP对比了
291	直接停业整顿一个月，我看谁还敢杀熟[呲牙]
297	直接拉入信用黑名单不行吗？禁止其贷款啦之类的，看他还敢不敢
301	直接按公司市值比例罚款算了[辣眼睛]
306	支付宝的哈喽单车，我和朋友同时收到月卡广告，他是14.5一个月我是14，他的手机比我贵
309	支持多收苹果手机的钱，谁让你崇洋媚外
311	之前最好笑的不是某大学宣布后天才能进校，结果机票直接涨了400吗[脱单doge]
312	之前我客户说，人家APP上订的比我订的便宜，我说那你自己订吧，我这边真的就这个价。
313	之前淘宝买一个价值2000+的东西，我就同一个链接去看，发现价格对不上直接，价格直接翻了一倍4000+，重新进去几次又变成了2000+
315	之前朋友帮忙订机票的时候就有这个情况，本来以为是因为朋友用的多，所以优惠比较多
317	之前复旦大学一位教授做的实验还有人记得吗？好像是自己花好几万打车做的，不同的手机，不同账号同一路程价格差距不小。还有罚款这个，某企业。。算了，腾讯罚五十万然后照样盆满钵满，甚至于直接和某些高中一样交完罚款直接光明正大毫不遮掩的寒假补课，罚不罚有啥用，最有用的还是直接下令整改，但不知道国家能不能有这种决心，毕竟都算得上行业支柱产业了 ps.不知道会不会限流，帮忙顶一下吧。ps.不知道会不会限流，帮忙顶一下吧
318	之前复旦大学一位教授做的实验还有人记得吗？好像是自己花好几万打车做的，不同的手机，不同账号同一路程价格差距不小。还有罚款这个，某企业。。算了，腾讯罚五十万然后照样盆满钵满，甚至于直接和某些高中一样交完罚款直接光明正大毫不遮掩的寒假补课，罚不罚有啥用，最有用的还是直接下令整改，但不知道国家能不能有这种决心，毕竟都算得上行业支柱产业了 ps.不知道会不会限流，帮忙顶一下吧
319	之前出差和同事一起点外卖，同事很少点外卖25减15，我的25减10，我退出登录后25减15，呵呵[笑]
320	之前不是不允许电商线下搞卖菜的么？现在那个什么叮咚卖菜，我他妈在路上骑着车子呢跟他妈狼见了羊一样想扑上来叫我下载，连卖菜这种摊贩的饭碗他们都要抢，真的再不管他们就要上天了！自从这些狗东西开始卖菜之后菜价一直涨幅大过以前很多，真尼玛不让人活了！
323	证据太好找 还是立法缺失和执法不严。公益诉讼一开放 每个平台都得跪
330	整改呗，罚款有啥用?
331	整顿互联网就拿小企业开刀，真正的那些互联网巨头处罚的都不痛不痒的
333	真希望新华社能看看，电商平台的拍卖托泛滥，产品垃圾等一些…
334	真是笑了还有人说苹果抽成，合着你买机票苹果还能去航空公司抽成啊，苹果自己都不敢说自己这么牛逼。
336	真实。我也弄过[笑哭]，买机票平板跟手机价格不一样，平板的要贵几块
337	真巧！我都不用[笑哭]我是不是落伍了！[喜极而泣][喜极而泣]
338	真对不起，让你发现了。下次注意价格一样，新用户送券，老用户没券。
341	真的很讨厌大数据，让人思想局限化
342	真的，我朋友最近要买机票，然后朋友八千多的苹果手机是1050，我两千九的安卓手机是910，有被无语到
343	真的，和舍友点外卖，十几二十几的炸鸡就能差下三五块
344	真诚希望彻底！严肃！从重！整治此类企业行为，赞同的人请为我点个赞
345	真把苹果用户当猪宰啊？苹果买机票比安卓贵几十块钱就离谱
348	这周订机票和酒店，都是在付款时显示临时涨价[微笑]
350	这种事情，应该加强监管，老板姓如果能左右这类事情，那就轮不得到无良商家来杀了
351	这种时候还是看不到老美那边的处理办法和要学习的 就一个不好判断和不好监管 那就不要你们来 换能干得来 让老百姓自己选！
352	这种情况反而并夕夕比他们好，价格便宜始终价格便宜。。。。虽然有的连三无产品都算不上
353	这种利用大数据杀熟的行为有技术限制，消费者很难去举报取证。还是要工商部门有专门人去进行使用测试叭。
355	这种打不到企业的痛点他是不会认错的，要弄就给他名头上的处罚，比如说能够记入天眼查等平台的处罚，影响它的征信、导致它贷不到款
356	这种处罚如果不能一体具罚那就没有任何意义，必须对其自运营起每一笔交易都假定为违法的前提进行处罚，才能有效管理市场
363	这样下去这些资本家未来是不是要讨论军队的划分了？？？！！！
364	这样罚款九牛一毛，事后接着干
365	这些资本越来越肆无忌惮了
369	这些企业用所谓大数据，用着高科技不干人事[热词系列_你细品]
374	这些大数据杀熟和大数据偷取隐私权很多人心里都明白这呢 有什么办法呢？甚至读取你的照片来判定你 有的软件你不开权限用不了 恶心 没办法 还得老老实实用 还有那么几个软件 非要读取你的储存信息 不给就禁用大部分软件 其实能不能读取我的储存信息对它使用来说毫无影响 可就是要这样 真的狗
375	这些app是做什么的？我手机里没有也不会有。tb我都想删，活动期间，折后价比平日价还高，得花心思对比[嫌弃]
377	这玩意也不是什么“大数据”这样的高级东西，软件也就获得个机型就完事了，扯啥大数据啊
378	这算什么大数据杀熟？安卓和苹果本就是两个渠道，渠道成本不一样，商家不能自主定价？
379	这算啥，我点一份同样海鲜炒饭，店里卖25，外卖app上48[无语]
380	这是我不用苹果的一个原因，本身苹果会有抽成，然后各大软件会觉得苹果的钱要多收
381	这是人性 想要用制度 纠正人性 从来都是杯水车薪 只会让人性的表现方式更加复杂化 最终我们在制度上非常完善 但是生活体验却更紧张劳累 恰恰与我们的美好愿望背道而驰 圣人之学教导人向内认识自己 看破人性 超越人性 这才是真正解决问题的方法
384	这是被限流了吧？！[热词系列_保护]
387	这时候我要问一下，MIUI可以搅乱大数据么？
389	这啥意思，是因为手机价格才有区别还是因为软件，为啥弹幕都在骂苹果
390	这杀的狠的狠啊，我刚搜一个东西他就给我推送了。你在一个软件上用久了，它就开始杀熟了。大数据狠的很。而且还有的软件是跨平台连接的感觉我在这个软件上搜了另一个软件上也给我推送了。
392	这让我回想起当初留学时候Uber的价格变动，我朋友的iPhoneX比我的iPhone8叫车贵5美金（同段距离，同车种）。果然资本家的手段都是一样的。
393	这年头谁用APP，不是自己走
394	这么说吧，只要我没钱，你就杀不了我，价格一贵，公交地铁，饭馆吃饭，自己做饭，航班我都是去航空官网去看价格
395	这么说吧，买了饿了么超级会员，结果同样的东西贵了好几块[doge]
398	这么明显的杀熟，还要算法证据？想不通啊。随便拿几个手机都能验证啊。
399	这么看，代码真就yyds，资本+科技真就所向披靡了[辣眼睛]
401	这么多天过去了，处罚新闻也没看到哪怕是一条啊
402	这两年看清这些平台的吃相后，就几乎没用过滴滴，美团什么的，算是支持下实体行业吧。
404	这里面有个律师说得特别好。这种事情不应该消费者举证被杀熟，而是立案以后由平台方举证我没有利用大数据杀熟。只要这一点可以实施，平台就会收敛，因为它自证成本就不低了。
405	这类软件老恶心了
408	这可不是数据杀熟，而是苹果手机APP交易产生的金额要缴部分抽成给到苹果公司。
409	这就是我卸载饿了吗美团的原因[辣眼睛]
411	这就是技术至上者吹嘘的“大数据”吗[阴险]
413	这就去买安卓手机??
414	这基本看国家的普通人能怎么办他就是这样搞你能怎么办受伤还是普通人总算知道商人为什么低贱不管怎么算大企业就那几个国家不管市场就那么几个没有动力看看大企业都有投资基本都有别的我不知道就腾讯什么都在搞国家要搞肯定搞腾讯 阿里这两个逼现在基本都有手机支付大数据一定要禁不然搞成外国那样经济危机谁还钱
416	这好几年前不就报导过了，现在还用得着研究认证？用了这么多年美团滴滴携程都没感觉的吗。每年都在报导这个新闻，问题不解决，靠这个恰流量的媒体，和以报道这个来冲业绩的官媒，每次报导出来都好像政府要解决这事情了一样，实际上谁敢碰这块蛋糕啊。
424	这个咱们能治理一下么@新华社
425	这个月好像有省考，订酒店的时候用同一个APP订酒店我自己搜出来比点他首页的省考打折活动出来便宜十几块[doge]还好我不省考，这应该也算杀熟，如果APP知道你真的参加考试，那就是要宰你
426	这个样本根本不够！苹果抽成臭名昭著，居然说商家有问题？你拿红米和华为的手机做个比较看看？反正我红米p30和华为mate40的价格是一致的！
428	这个是真有 美团订外卖 同一家同一份 一天天价格变高
435	这个名字总没人用苹果不会对这种实体商品和服务抽成，纯粹是杀熟，而且同平台这些东西贵的安卓手机也会比便宜的安卓贵
439	这个安卓手机的导航栏，还有中置挖孔和微曲面，是三星s20系列的+或者u无疑了。我知道是因为我就在用三星s20。[笑哭]
441	这方面饿了么是行家
442	这罚款怎么说呢，对大企业来说罚款不痛不痒吧，开一会充值送东西活动可能就赚回来了[吃瓜]
443	这罚点小钱，不用一天就赚回来了
446	这东西不就是奇虎的流氓软件三七二一搞出的，阿里、亚马逊、三六零各继承了一部分，现在更是搞得到处都是，mmp[阴险]
450	这不是之前有学者做的课题吗，怎么就变成新华社记者了？
452	这不就是资本么
458	这 都拍下来了还要消费者来起诉监督 这……
464	啧啧啧buit大数据杀熟苹果安卓都一样.这个视频你看懂没.就是同样时间的机票另一个手机却贵
466	早就发现这个问题了，去同一个地方，平果手机打滴滴二十多，安卓不到二十
467	早就发现了，用美团定客房的时候。
469	早tm不用滴滴了
470	赞爆了 新华社牛b[吃瓜]干他丫的
472	在这个大数据的时代下，你我皆是裸奔之人
473	在我经常叫外卖和出租车的时候，我总是同事中价格最高的，[热词系列_害怕]我连游戏买个跟兄弟同价位的礼包，都是我的内容鸡肋，他的丰富。md，就无语，没爱了。[tv_发怒]
476	在某外卖平台，多次发现，只要是买过的店家，第二次再买，起送费全比第一次贵了，这是杀熟嘛
478	在互联网巨头眼里，你就是“赤裸”的，就连你自己都不知道自己是不是“赤裸”的，信息时代下，打个不恰当的例子，如果各个巨头互相关联，个人信息库共享，可以造出一个和你经历相差不大的生理上毫无关系的你[捂脸][捂脸]
479	在饿了么订餐，第一下显示20然后返回再点结算显示18再返回在点结算在返回再点结算，每次都是这样变。。。
481	咋评论区这么多扯苹果的？你用贵一点的安卓手机也会被大数据杀熟的。。。还有扯到苹果收渠道税的事了，这个玩意不是只收虚拟物品的吗？你在淘宝上买东西被收过？而且华为小米国内各家应用商店都有这种虚拟物品的渠道税，说国外的话 谷歌 Steam都有 比例也跟苹果一样。
482	咋不说说携程，酒店价格，会员比非会员还高，离谱[辣眼睛]
484	越大的资本越需要被监管
486	缘来来应该说：都是腾讯系的，目前生活软件也就阿里腾讯两大系
487	原来大数据是这样用的
488	御坂-12334号新华社啥都敢说，太猛了。
490	遇到过，我和同学面对面打开小米商城买看小米手机，同样的东西。我的有货，他的售罄。我是不看商城的，他就经常跟我说小米新货的事。没想到也是原来是大数据杀熟了…………
491	遇到过，饿了么美团现在好像也还有
494	与其这个能不能把所有社交平台点踩数量显示呢？现在只要引战和冲突的新闻或者负面的都是很多赞，但踩不现实，这不怎么引导未成年人形成三观？
497	又一次出去旅游，我和同学点外卖，我就有12块钱的满减优惠，她就没有
502	又多了个不买苹果的理由
506	有一说一弹幕别再说苹果抽成了，这些软件付款走的都是支付宝微信，不过apple store没有抽成的，就只是单纯对苹果用户多收钱[吐]
508	有一说一，新华社到现在才一百万粉，这才是最离谱的
509	有一次同一件东西，在淘宝付款不用运费用天猫还得额外付运费[嗑瓜子]
510	有问题不用又不会死，直接软件下架[OK]
513	有什么用，现在还在杀熟，美团饿了么两个破软件
517	有啥用，你走法律途径人家都不怕你，人家一家大企业看你就像好像看蝼蚁一样
519	有人评论“所以不要设上限了，根据盈利来罚款”被删评了，谁做的？为什么？
522	有热评被删了
524	有两次买机票下单的一秒提示贵了几百，果断换另一个APP
525	有的人就跟nt一样，过appstore的支付才会抽成，类似王者充值，第五充值。实物或美团这些点餐类似的东西，经过的是支付宝和微信，到了他们手，你觉得怎么抽？人apple又没经手，他怎么抽？
526	有的价格变化很正常，因为和剩余票的数量决定的，可能加上一些其他因素，这种价格浮动在允许范围内。但是这个是不同的，就好像几个人在同一个时间同一个地点坐同一辆车，每个人的票价不同
527	有的弹幕真恶心（我反正直接举报）我买什么手机需要你管[无语][无语]
529	有弹幕说用安卓都是穷人，我直接举报了[辣眼睛]
531	有次住酒店。第一天是周六在美团定177，第二天想续住，美团220 去前台问180[OK][OK][OK][OK]
532	有次用微信上的滴滴，我前面还认证过学生身份说是有折扣会便宜点。那次因为迟迟决定不了到底去不去那里，我就同一个地点不断退出重进退出重进，眼睁睁看着价格一块两块三块的往上加。这期间我一直在原地没动，目的地也没变，就重进几次价格就涨了！另外虽然认证了学生身份！同一路线用滴滴我就是比没认证的价格高3～5块！滴滴真恶心人！
533	有次买飞机票，一次比一次贵，前后几分钟就涨几百块，原来我也被杀熟了
534	有次广发信用卡App上点分期，同样分3期，同一天每次进入分期的手续费都是不一样的，最大差额达到几十元每月的差额。以为自己眼花看错了，当晚就操作十几次每次的截图对比，发现没有一次手续费是相同的。跟同事说了根本没反应，还说怎么可能说肯定我看错了[囧]之后再也不分期了。
540	尤其是在华为手机用户，智商鉴定完毕!
542	用抓包抓它们的数据[辣眼睛]
543	用苹果手机的人都不在乎那几个钱。肯定要高一点才能体现出来价值观和品味啊。
544	用苹果手机的肯定贵一点啦，人家能用苹果机在乎那点钱嘛[doge][doge][doge]
545	用苹果手机本来就是人上人，贵点很正常，尊贵体验
550	用法律判定一个企业是否具有支配地位都非常困难，但实际去找几个人问问就能判定出来
551	用滴滴同一时间同一地点比同事贵15
552	用不起苹果，点外卖超过十块钱的都不买[doge]
554	永远支持为人民全心全意服务公开透明的12306！
555	应用商店给钱就上架，安卓获取用户隐私没人管呀
558	应该建立一个监管部门专门整这些网络上的东西
559	应该构成消费欺诈假一赔十。由消费者举报企业。企业必须赔偿
560	应该罚款一单50万！！
561	应该按百分比罚款[滑稽]
565	因为罚的不严重维权成本低
570	意大利外卖平台刚被罚50个亿，真不能说一样
572	奕白黑回复 @i860 :道理是这个道理，但是个人感觉里面主要问题是没工具，因为拼装这一块，自己以前也接触过，有一些经验，还有感觉他也没对电脑做什么事情，就收费，四十对一个学生来说不算少[笑哭]
575	以前由于工作原因，我经常在外开酒店，后来一次大学同学从外地来找我玩，我们一起在美团看酒店，我的均价都比他贵30-50，我就觉得离谱
576	以前要做到区别定价而让人接受需要垄断，现在只需要大数据，就可以为每个人定制不同的剥削
577	以前很信任飞猪，学生一枚，不怎么常买机票，机票都在飞猪上买，直到有一次，发现官网价钱比飞猪还便宜！之后我就只在航空公司官网买了！
578	以前和朋友用美团订酒店，都没优惠的情况下朋友每家酒店显示的价格都比我便宜十几二十块，就离谱
579	以前还以为新华社很厉害，自从你灰溜溜撤了阳关林场案子的置顶，暴露出外强中干的本质。
584	以后罚款还是根据盈利比例和规模罚，让他们感到疼
585	移动手机套餐就是这样，我13年网龄基本没有什么优惠，人家新入网一年以内的福利多多。艹
586	移动价格歧视算吗[微笑]
589	伊甸希望乐园举个例子，美团恶劣天气会提高配送费，这些都写的很清楚（我基本天天点外卖）
591	一直都觉得大数据恶心
592	一直打着大数据的旗号堂而皇之的那我们的个人数据买卖获取利益。我们似乎没有一个消费者真正享受到了大数据带来的便捷，但资本家是真的赚到了
593	一直被杀熟，最近jd啤酒打折中棒子好价没货，每天看两次一直没补，今天手机上发了张30券，直接入了两件大棒子，估计东哥天天见我只看不买都烦了
597	一些人脑子是不是魔怔了，你跟他说价格不一样他说苹果啊有分成的肯定贵啊！你在拿两个苹果手机说事，又说不就两块钱嘛都大点事。[辣眼睛][辣眼睛][辣眼睛]
598	一碗胡辣汤加四个大包子，去店里7块，网上下单13。几年前去西安玩十天，雁塔景点附近，某住会白金会员，头三天330一晚，然后就奔380而实际上价格要再低。所以整得要货比三家[吃瓜]
599	一群人说是苹果抽成。苹果只抽成虚拟商品，提供实体服务/商品是不抽成的[蛆音娘_无语]了解清楚再说呀
600	一年前我点一份饿了么20，同一家店美团22，现在同一家同一份饭我用了超级吃货卡减掉5元后25，美团什么都不用23，一直都是同一家店的，我经常去店里吃，店里也没涨价，一个套餐也就16。最近每次用饿了么，他告诉这顿给我优惠9快钱，我就觉得他是在骂我沙比
601	一块钱或许在我们眼中不算什么，但这个数字乘于一亿呢？别忘了这一块钱不只是从我们这里拿还有其他成百上千几亿人身上拿，那你再想想这一块钱会不会过分了？一块钱乘于一是不是暴利？用点脑子想想吧唉被那些资本忽悠瘸了的人[无语]
603	一经查处建议直接把企业罚到破产[生气]
604	一级价格歧视
605	一个是没有专业的部门发现和治理 另外违规 擦边球 甚至犯罪成本太低 处罚之后还是挣钱 那就没啥好怕得了
608	一个价格从高到底，一个从低到高，能一样？
610	一个APP搜索，多个APP提示[惊讶]
612	一定要狠狠打击这些资本
613	一定比例按当年该业务营收来罚款[嗑瓜子]
615	一旦出现杀熟，直接罚款到破产就好了嘛。举报者有奖励。玩来玩去还是古代那套，什么时候再出来一个汉武帝。
616	一次又一次报道，倒是处罚啊。。。
617	一次警告，两次罚款，三次禁入，你看还有杀的没？屁大点事好几年搞不定！
619	一次处罚几十万，然而他们可能已经获利数千万，数亿，哪里会因为这警告就怕了？
621	一查出直接强制下架，不整改不得上线，整改上线后再出现杀熟情况，直接封禁，要不然罚款有毛用啊，杀几个熟又赚回来了
622	一般不吃外卖，机票在航空公司官网订，火车票12306[嗑瓜子]
623	一百多万粉丝的新华社视频发布了俩小时评论都不过1000?胆子也太肥了！
624	葉苡仁回复 @南川醉红 :这两只 会轮着送你会员抵用券...但如果你一直用一个平台，就啥也没有
626	业内：国内手机厂商抽成其实远比ios高
630	要知道滴滴直接收司机一单20%，人家司机宁愿待家家里也不出来跑，再算上苹果的额外20%。我用过一个叫车软件的司机，人家直接说，正是他们乱搞我们才有市场
632	要想想美团是靠什么赚钱的，当它掌控了数据，就可以为所欲为了；不是每个人都会被杀熟，但只要它通过操纵数据，在巨大的消费群体之下就可以获得巨额利益，简而言之，大数据让每人给我一块钱得到了可能，真乃科技造福人类也。
633	要同平台对比，苹果多了平台抽成
635	要是想惩治，直接开放举报平台同一时间不同平台价格高的免费，然后全民比价
636	要交苹果税啊，他这个软件再苹果里面支付要付钱给苹果，怎么能算杀熟呢，应该怪苹果霸王条款，当然我没有苹果手机 ，不要喷我
638	要不是因为我大学12人寝 我都不知道我美团外卖价格和室友的价格是不一样的[辣眼睛]
639	要不就是苹果系统扣了钱，要不就是软件本身杀[doge]
640	要保号删视频[doge]
641	妖精の风回复 @玄冰灵虎 :而且你所谓的VIP一对一服务，那都是1%不到的人享受的服务了，至少我身边有钱的人日常生活依然是淘宝购物、实体店购买为主，只有家具等才是与厂家对接的订制
642	妖精の风回复 @大聪明学府 :是的，很多时候线下线上买东西，最终的价格也就是看买卖双方砍价情况决定，本身就有差别
651	雪灵本灵查处一次企业加税百分之十不可以吗
654	学校要求开个会，说小孩要懂感恩，到头来是为了卖产品。
655	学习美国的集体诉讼，由诸多律师事务所代表大量用户进行诉讼，一旦胜诉，企业需要对大量用户支付天价赔款，而参与的律师可以按比例分得高昂的报酬，这样就会激发律师团体的积极性，从而对企业起到有效的监督作用。
658	学大数据的表示真的很怕也很恶心以后做这种事...
659	玄冰灵虎只要你还是用微信和支付宝付款就永远不可能套锅大数据的监视
661	需要大力度的整改 大数据多可怕啊。。。。
663	熊钻风你看，就是能有人能把本该对准资本家的枪火调个头对准监管人。好一个转移话题。
664	兄弟们跟着新华社冲！
667	幸好我把苹果手机卖了换vivo[嗑瓜子]
668	幸好是新华社，不然这个视频就得消失了吧？
670	新闻没新华社我不看[doge]
673	新时代资本家[doge]
676	新华社终于说到这事了，个人认为罚款不一定能起到打击作用，如果发现此类情况建议阶梯式停用app，停用你几天几周甚至几个月，自然有别的更好的app会冒出来
711	新华社比央视更关注民生问题社会百态
735	心有四季人有百痛回复 @灵台方寸沃野千里 :苹果税一年比我国其他任何手机厂商利润都高[吃瓜]
738	携程买机票也是
739	携程买机票同一架航班，我和我同学都比他老妈手机上的贵了几百块[笑哭]，就离谱，我们都安卓
741	携程比去哪儿贵 同样的航班真的能贵几十块 然后去哪儿不同的手机不同的用户费用也不一样 真实可靠的本人体会
747	小雨゛回复 @雪灵本灵 :可以按照百分比罚款也挺好
748	小樱的魔法棒@美团 有什么想要说的吗
750	小十apple外卖也一样，看着看着运费就涨了一块钱，还说收货地址发生改变，其实一直没改，就不知道怎么回事
751	小米屌丝机，美团 天天神券，天天满45减3 对了，还是2块钱膨胀到3块[微笑][微笑][微笑][微笑]
755	想起有一次打车，滴滴司机接我时，还和同行特别强调了一句，接到一个苹果的[tv_发怒]
756	想起了一个段子：某人打出租车，有司机闲聊，司机说，我们这种做滴滴的，就是和大数据做斗争，干几天，歇几天，这样系统就认为你不想干了，给你些顺路又高价的好单，不然你一天干十几个小时，都是些满城跑的偏僻单子，努力是努力了，但是也赚不到钱啊
757	想凡同非我看到过滴滴打车同一段路程，从12到20多快30都有[灵魂出窍]有时候真不敢打车，太贵了
762	现在知道该买什么手机了吧[doge]
763	现在这些购物网站，两个账号价格都不一样，有什么办法呢
764	现在越来越少网购了… 就快连外卖也放弃了
765	现在腾讯，阿里的心理很好理解。就是想着政策，法律还未完善。这钱能多骗一点是一点
766	现在套路是真的多，处罚要加钱啊[滑稽]
767	现在是随机优惠券，我一个号买了淘宝的88会员天猫超市永远领不到满110减20的优惠券，我妈妈轻而易举就能领到。
769	现在拼多多淘宝京东还有抖音甚至B站的用户浏览信息在这些平台都是共享的，这个大家没有异议吧？当你想买一个东西的时候这些平台都能精准地投放广告，而你根本就没有在那个平台有过浏览或搜索某个商品的行为但是它却能精准投放广告，你觉得这是为什么？这太显而易见了，只要你在某个互联网平台有搜索某商品的行为，你的数据就会被卖个其它的平台，这些平台一定有签订合同的，有交易的，贩卖用户隐私数据是这些平台另一个获利的手段。所以我再说一遍:互联网没有隐私可言。
770	现在买机票我都在航旅纵横买了
771	现在连美团优选都是，十几块钱的东西，我的手机跟我爸妈的手机显示出来的价格都差着几块几毛，有的大商品甚至几十。
773	现在法律作用局限太大，很多法律无法真正规范人行为，有些人明知道法律禁止某些行为却仍然要去做，抱着侥幸心理，千方百计去规避法律而不是遵守法律，让法律成为信仰这条路还远的很
774	现在都搞随机减免，杀熟也在进步，无论罚款还是警告，都改变不了现状
777	现在大数据杀熟都改用红包了
778	现在打车用滴滴我都得跟媳妇比一下同没有优惠，我安卓贵了好多
779	现在不是价格变动了，现在改为了随机立减，你拿他没办法。。。
780	现在不是价格变动了，现在改为了随机立减，你拿他没办法。。。
785	夏末秋凉丶遇见你建议地图软件打车
786	下次罚款一次十亿美金
788	喜欢淋着大雨的热烈官方该杀还是会杀?????♀?前两天在东航官方app上买机票，结果发现同一趟航班比他们官网贵了五十块钱[热词系列_害]
790	曦落尘风没有大额券不点外卖[嗑瓜子]
791	希望有关部门点名批评整改
795	希望加强监管[无语]
797	武汉欢乐谷至循礼门，我手机打车价格是69，朋友89，这不是杀熟，这简直是杀猪了。
798	吴献平仔细看新闻，今天开会规范平台经济了
800	无厌丶呆呆狗其实各大民航都有自己的网站的，我买机票一般也会去那些地方买。。。
801	无双-疯神回复 @这就是二次园吗_i了i了 :所以说和玩家屁关系都没有，那么多人又吹又黑的是吃饱了撑的还是厂家买的黑子。而且苹果手机买东西贵一点是事实又不是看不到
803	无生不死即永生值钱的是数据，人只是附属品
811	卧槽，昨天舍友刚遇到，坐地起价，果断不买了。
812	我坐不起飞机，用的还是翻盖机，是不是不容易被杀熟
813	我昨天打车上午花了17块，下午打车回去就变成24块了。。。
814	我最近美团天天神券每天都是满80-1 我他妈都笑死了 饿了么最起码给个4 5意思一下 美团连意思一下都没有
815	我自从买了苹果12ＰM之后贴吧老是推送拼多多9块9的苹果12 还有B站的一些相关视频[疑惑]
816	我注销携程、美团等账号三四年了，拼多多之类的几乎没有用过，实在是因为他们营销套路太多，不堪其扰，我们以为的砍价、提现，其实是在窥探你的人际关系；我们以为的折扣，其实是基于算法隐藏规则并没有打算给我们让利；我们以为的浏览几秒便可以领化肥，其实是在记录我们的兴趣点，便于精准推送。所以在无法强力监管的现实下，大家还是要从自己出发，理智对待大数据，不要图一时的开心、便捷，就让自己成为数据网的猎物。
817	我直接去12306买火车票吧[捂脸]
819	我支持给苹果手机，加钱！因为他们钱多买苹果手机
820	我之前在去哪儿上面买票也遇到了这种情况，比对了我和我家人手机的价格，但后选了最便宜的那个。
821	我之前用支付宝给手机充话费，用卡1绑定账号登录，显示20元话费缺货，20元以上充值没有折扣。用卡2绑定账号登录，20可以充值。且20元以上有折扣
822	我之前用飞猪买车票就是这样，我看了一下没买，过了一会儿又看了一下，显示票数紧张了，过了几个小时一看，票数又充足了。
824	我之前搭哈喽顺风车，真的同一个地方，搭的次数多了，后面打车要多花几毛钱。这个算不算杀熟[笑哭]
825	我在语文练习册上遇到过“大数据杀熟”[辣眼睛]
826	我在微信买火车票 硬卧显示没票 需要抢票 相同情况下支付宝却能买到票 有人有这种情况吗
827	我在去哪儿买高铁票，以前学生价71，有一次买就是94.5，说打折票不能用学生优惠，关键我找了半天没看见哪里打折，以前不买学生票原价94.5，最后还是12306买的，71块
828	我在美团做过客服，我们培训的第一课就是不要不要不要承认平台存在大数据杀熟的行为
829	我在航空公司官网用pc订的。比所有手机APP都便宜
830	我在高德地图也遇到过！价钱一会一个样！我定个房在考虑和对比转眼越来越贵了
831	我在飞猪订了3天酒店，后面再用飞猪订那家，价格翻倍，携程没订过，就是原来的价格
832	我遇到过，淘宝买一件衣服，三个淘宝号最高和最低价格能相差半件衣服钱
833	我遇到过 美团配送费 会员更贵
834	我有一个旧手机 旧手机不管是外卖还是其他网购都比新手机便宜
835	我有一次点美团，用了券，第一次是4元，第二次是10元，第三次8元，我为了刷到第一次的价格刷了10分钟，最后成功吃到四元餐[吃瓜]
836	我有三个淘宝账号，今年2月家里电压力锅坏了，挑了半天看中苏泊尔的一款，三个淘宝账号在苏泊尔厨房电器旗舰店里看同一型号的标价一样，但是能领取的优惠券额度不一样，我交易量最高的淘宝账号上的价格最贵，最低的最便宜，最后当然用最便宜的那个账号下单。
838	我有个疑问，如果所有的苹果系统都一个价格，所有的安卓系统都一个价格，是不是只能算不同平台的价格不同的问题，是平台定价问题，杀熟不是应该同一品类商品在不同消费习惯的人群中不同的价格吗？
839	我有个机票，广州到杭州，开始买的9.10分，买错了改签改成11.10的，多花了两百不到，之后打电话给我说那趟飞机票没有了，后来我说改成12.10的，他说那趟比较贵，要多五百块，我着急嘛就答应了，我以为是在七百多的基础上多五百，毕竟前面那次改签失败了嘛，结果是七百加两百加五百，花了我一千四，然后我后面再看，明明还有票而且并没有那么贵，我气到爆
840	我有段时间中午去店里吃不常订外卖，每天打开都有一张7块钱的无门槛红包，后来就常用了就变成5块的，然后又变3块的，2块5的，越来越少
843	我用我老婆的手机淘宝搜索商品比我自己的要便宜很多[笑哭]
844	我用苹果手机就是为了比你们高一等，买东西在不贵点配不上我的身份[嗑瓜子][嗑瓜子][嗑瓜子]
845	我用饿了么美团，一个app用久了，就会杀熟。滴滴也是[OK]
846	我用滴滴一口价打车上下班，价格稳步增长中。饿了么平台红包也杀熟，经常点外卖红包就小。美团早已经给我杀走了，已经彻底放弃了……
847	我用滴滴打车付了120多，司机那边显示只收了100
849	我以前说杀熟还有人在维护，真是醉了。我开了会员，结果我的价格居然比没开会员的高，我朋友就在旁边，他没开会员居然比我价格低。[辣眼睛]
850	我以前美团会员月月15买了几年从来没给过我优惠，直到我听说了朋友会员3块[微笑]，狠心断了一个月它还是报给我15才能开，我又断了一个月不用它。它给我报三块了[吃瓜]
851	我已经不用手机点外卖 买衣服 买火车票了
852	我已经被美团杀熟杀习惯了，打算换饿了么来杀我[OK]
853	我一个淘宝88会员买东西的价格有时候都比普通号贵，搞得我有时候买东西都要用爸妈的账号
854	我一般都是上携程看好机票和酒店，然后直接到航空公司官网和酒店官网买。烦是烦了点，我也不差这几十几百的，但我就是不想让这些孙子赚黑心钱。你要是提供好的服务，或者让我打赏你一下，我乐意，我就给你。但你要和我玩阴的，那我就不怕麻烦。
855	我也试过，我自己经常点到那家外卖，用我妈的手机去点能便宜4.5元左右，当时我都搞不懂这是什么情况，今天才明白原来是这样[微笑]
856	我要这头发有什么用回复 @Vone某条蠢鱼 :不吃外卖，酒店到地方定，机票机场订，90后孤寡老人实录[嗑瓜子][嗑瓜子][嗑瓜子]
858	我要大声的喊出！！新华社nb！！
860	我寻思这视频讲的也挺好啊，下面推荐的视频都好多播放量，对比下，这个视频就显得特别低了。[思考]
862	我想知道那些官方号怎么不来评论了？@ 腾讯@ 美团 @ 滴滴 @ 阿里巴巴 @ 饿了么 @ 飞猪
864	我想问一下 大家有没有扫哈喽单车 还车时 明明别的人的手机显示可以停 结果自己的手机显示不可以停车 定位总是飘 自己不动它自己跑 [捂脸] （我苹果手机出现了2次问题了 我同学安卓手机就没事）[笑]
865	我想问，杀熟到底具体是什么意思，就是这种不同平台价格差异吗？
866	我想说99.99％的软件都存在杀熟行为，剩下的0.01%正努力研究杀熟算法。
867	我想起以前看过一个故事，某高校查询学生饭卡消费，给每个月在食堂吃25天以上，每餐消费不足8元的学生发放饭卡补贴，既帮助了学生又维护了学生的面子。
868	我想起了，之前我订房间，我的房间价格要7百多，可另一个人的只有两百多，我还以为是我运气不好，现在想来原来是这样
870	我现在用慢慢买和什么值得买这两app防杀熟，不是历史最低价就不买。就是怕这类app是跟电商同流合污……[呆]
871	我现在一般用软件都不登陆，无账号情况下去看，看好了再买，买完就退。[doge]
872	我现在美团买红包就8快钱了 以前5块钱
874	我为什么觉得美团会员没怎么省钱呢！
877	我吐了，我用的苹果12，我朋友是华为，他打车8块，我打车9.5
878	我同一台手机两个不同淘宝号上同一件商品价格都不一样
879	我同事的美团和我点一样的莫名其妙的贵，好么，原来如此，我都没想到
880	我通过公司可直接报销的平台订酒店182，其他渠道和直接去酒店订是149。我反馈了，给我的电话的回复说 ，渠道是和公司合作的，可以直接报销，不和其他平台渠道比价
881	我天天用滴滴，每次打车5km，价格真的是从我在用了一段时间后就上涨了，从6，7块钱左右上到了8，9块多近10元的地步，我还回回都买了优惠券也只能压到8元多，显示我半年省钱近400，可是车费较我刚开始用的时候真的上涨了不少[捂脸][捂脸]
882	我淘宝买东西比朋友的贵，每次都是贵几块到十几块
883	我他妈让携程杀惨了，已经卸载，凑不脸了简直
884	我说怎么机票约刷越高，wc
885	我说一句，资本家凭啥觉得能够挟持人民要挟政府？说句不好听的，有污点有不良记录的企业和公司，哪怕直接被政府拆分出售，都有一大堆人会去接盘。凭什么，就觉得能够挟持人民要挟政府？在这一点上，我绝对拥护中央及政府；这绝对不会影响到我心里对于政府法规是否维持了市场自主自由的判定。
886	我说外卖砸越来越贵
887	我叔叔是老板同地方同距离五十到七十，我放入社会没钱同地方最低十八块最高高峰期三十块要是出租车可能只要十三块……[笑哭][笑哭][笑哭]
888	我手机上的皮皮虾，整天给我推荐三国杀的游戏，可是我从来没在这个手机上玩过三国杀，它怎么知道的
889	我室友上周买了个零食架但是我从来没搜过 昨晚逛淘宝首页就给我推零食架[捂脸]我当时还跟室友吐槽大数据真nb
890	我室友点外卖价格就和我的不一样，而且不定期发券，我很少点外卖所以券特别多
891	我是滴滴抽奖活动过来的[doge]
892	我使用淘宝省钱卡，一直在担心使用了之后看到的商品价格会不会变动。
893	我上东家倒闭后，就把注册APP的学生信息卖给同类公司了
894	我上次在淘宝买袜子，我一个女同学帮我搜了搜，她找好一个十九块九五双的，觉得还不错，分享给我，然后我打开这个链接后。。一模一样款式同一家店，我这边显示卖三十多！太坑人了吧
895	我去淘宝京东拼多多去查一样物品，然后退出软件后其他软件封面就会推出来我查过的东西，这是为什么嘞?
896	我前天点外卖，结算时要21我用一个5块红包，然后我发现开会员可以换店家8块红包，我就开了，结果结算用了8块红包反而还要23 真把我恶心到了，花了钱还变贵[2233娘_吐魂]
897	我前两天在某宝看一款商品也是这样，凌晨我看的时候还是171块，白天八九点再看变成了181块[辣眼睛]
899	我朋友买火车票来回一趟要一千左右，我手机上显示也就400多
900	我能举报美团和饿了么吗！
903	我们这些普通人早认证了 出差同一家宾馆不一样的人不一样的美团价格
907	我美团一个星期没点餐，然后连续几天送我60-8的神券，之前每天最多就4块、2块优惠券
908	我美团外卖估计是被杀熟了，天天点
909	我美团同一家店一直保持消费，原来越贵不知道是不是这原因[笑哭]
910	我美团和同事点同一家外卖 一样的东西，他比我便宜7元，而且2人都一样用了5元红包。我直接和店家反馈 过了几小时店家说他们反馈美团了才解决[微笑]
911	我没有遇到过，因为我贵一点点都不用了，每一种好几个APP比价[doge][doge][doge]
913	我卖了之前的米9se换了一个苹果8就感觉打车变贵了！果然是这样的！
914	我买同样产品，到货后第二次比第一次少挺多的，反馈给客服人家说不可能，拍照给看了也反驳我，我直接差评再见这家店
916	我买机票都得用父母得手机，平时没有查看记录，也会便宜一些。
917	我买火车票都是在铁路12306官方APP上订，但是机票一般只能就是美团和微信什么的，所以我想问一下有没有这种官方整合的航空公司购票的APP....
918	我买的青岛航空飞机票，然后学校开学前五天推迟开学，我只能改签或者飞机票。退票因为不到3天，需要支付70％。金额，想和航空公司客服打电话，问一下能不能申请意外情况免费退票。结果发现根本打不通[拥抱]
919	我买车票啥的都是在微信官方公众号里买，这样应该不存在杀熟吧
920	我买cpu苹果手机要贵100多，淦！
921	我老婆买机票她的机票显示800多，我的手机显示600多，绝对真实，前两天的事，都是安卓机，同一个平台，我老婆经常出差。
923	我来：@腾讯 @阿里巴巴 @同城艺龙 @京东 @滴滴 @美团 。出来吱个声呀
927	我觉得很大一部分是，苹果的额外抽成，这部分抽成让消费者买单了[妙啊]如果对比的话，建议对比一下华为高端手机和苹果和安卓中低端手机之间的差异
928	我觉得不用罚款，以后再出现这种情况，就强制下架软件一个月，已经下载软件的手机通过技术手段禁止继续交易，这才能戳到痛点上
931	我就想记者没手机吗？不早点报道
932	我就想安安分分这个代码，赚点钱结果成了资本手中的刀，还初心。。。
934	我就天天看着我购物车里那个东西，他40元/58元的变，每天都变[doge]我是40的时候买的，就不知道多少人是58买的了
935	我就说点外卖，昨天的炒米粉15块，今天突然变成16.5了[doge]
936	我就是做美团外卖的。今天一个顾客联系我，他支付了22，订单显示顾客支付18，最后商家收入12[doge]，不想说什么了
937	我就是做广告投放的，谷歌就有各种后台精准数据让你选择投放，还有edm再营销，只要是网络公司，国内外都一样，没有安全一说
939	我就记着我在美团看自助餐的票73，我就想着到店再点也来得及，到店排队的时候一问才65[辣眼睛]我就合计这玩意打折是给腿打折了吗[doge]
940	我就记得我在淘宝买东西，给我老公发链接让他帮我买，他买比我买贵一块多[辣眼睛]
941	我就发现我越来越喜欢新华社了
943	我京东买棉胎，付款400块钱到手后再去看价钱199，昨天我买了一双739的鞋，到手后349块钱，艹。
945	我建议禁止所有商家使用大数据，这玩意对民众的弊大于利，一经发现直接罚款2000万并停业整顿一个月
947	我记得有个关于新冠的视频 还是国外的 一部分人看新闻认为新冠无害 一部分人知道新冠的危害极具传播性 他们使用的同一款软件 他们还是邻居[阴险]
948	我记得不但杀熟，而且还读取手机型号，判断价格高低，给相应的价格，哪里说的不记得了[灵魂出窍]
949	我换新手机就把旧手机留下来，旧手机用来打电话点外卖日常通用，新手机就用来打游戏看视频啥的。
952	我和我同事两个人的手机，他是一个旧手机，只有我手机价格的一半，我们同时叫车，他的每一款车都比我要便宜2~3元甚至4~5元
953	我和我室友打车去火车站，他手机和我手机里滴滴不同价格
954	我和我朋友都是苹果手机 我是ipx她是ip12，前几天去看电影，我查票价32，她的票价就19.9，都是在小程序上看的，给我整无语了，最后用她手机买的电影票
956	我和同学点一家店，他运费2.5我是4.5。就因为我是会员，用了优惠券吗？但我的优惠券也是花钱买的啊！开会员究竟能减多少你按实标出不就行了。6元劵只能减3元在其他地方暗自加价，为了让更多的人买会员真的是什么手段都能用。我用的是支付宝饿了么，南京明故宫那边点的。
957	我和同事在淘宝搜同款手机壳，他搜出来的都是一百多的，我搜出来的都是30以内的，这算不算杀熟
958	我和朋友一起打两台车出发地目的地一样，我因为打车打得多，价格比她贵6元。才3-4公里的路程，平均每公里多1.5-2元
962	我还知道，网约车app会故意多收钱至实际的50%，哪怕证据打实了，也只会多出部分退回。
963	我还纳闷了，我昨天点外卖，我同学拿他的手机（安卓）给我指他要点这个：叉烧包4.7元，我看了一眼就答应了，我（苹果）在同一家店铺加购的时候是：叉烧包5元[微笑]我当时愣了一下，然后把原因归结成可能是我看串行了吧[微笑]今天想想就觉得tm离谱
965	我工作的地方有国内外各种各样的手机 我跟同事试过 用不同的手机在同一个APP上面看同一个人商品或者服务 价格不一样的情况出现很多次 但是看不出来他们的规律 搞不懂是怎么计算的
966	我跟我朋友聊天说要买个鞋，结果打开淘宝就给我推荐鞋，刚开始我还以为运气呢
967	我跟我姐每次点外卖，无论价格跟配送费都不一样，每次都是我她高少则几块，多则十几块
968	我跟我几个同学外出用百度地图打车时，都是一块打开，看谁的报价最低，一个红米K20，一个小米9，一个魅族16sPro，有时候在有优惠券的情况下价格会有明显差别
969	我跟室友在寝室点同一家同一款外卖，我比他贵8块钱[doge]
970	我刚发了个狗东杀会员的评论被删了，一条一条找都没找到，来啊，再删啊！！！
971	我感觉用京东就不会，因为京东里面价格一直在反复纵跳[灵魂出窍][doge]
972	我感觉美团就是靠今天杀你几块 明天杀他几块 薄利多杀 迅速积累的财富 我的外卖费很奇怪 有时候不要钱 有时候几毛 有时候5～ 6块 个人看是不多 但是他一天杀几千万人 不就过亿了？
973	我感觉！我多刷几次携程，机票就变贵了！
974	我发现过，上午加入购物车的外卖21.5，下午23.5。还有我的配送费是3元，别人的是2.5元……这种积少成多的加价，让我每个月都多出了200的餐饮支出
975	我饿了么就被杀熟了，舍友和我同样套餐我比他贵3元
976	我饿了么会员开了自动续费，平时点的也多然后发现追加优惠券一张贵了一块[嫌弃]
977	我饿了么点外卖一直有红包，我老婆一直没有，点同样的东西哦，我老婆是苹果，我是华为
978	我都用国航 南航官方的软件 ，它还要杀我，我也没法不是[辣眼睛][辣眼睛][辣眼睛]
979	我都是几个平台比较着来买??尤其是考试住宿，普通住宿一晚同一个地方平台差一百左右
980	我点外卖只点同一家饺子馆卖的芹菜饺子，美团给出的价格经常变动，19元-22元不等
981	我弟在淘宝上给同学买生日礼物，他用他手机搜了价格，要我帮他买。我一搜，同样的店铺，我的价格就是要比他贵10块[吐][吐]资本家丑恶嘴脸
982	我滴滴打车，同一个距离去的时候9元 回来就变19元了[呲牙]
986	我的跑跑卡丁车，我每天就上线拿个首胜就下线，现在钻石了，胜率和均排名都可好看了，我对象天天玩，比我厉害多了，但是胜率和均排名都没有我的好看。
987	我的美团会员都是迟几天再买会便宜，还有加量包一会八折一会五折，其实五折是最早都是五折，八折乍一看觉得优惠，其实是涨价了[doge]
988	我的哈罗单车会员比我姐的贵，，而且她还有中行付款2块一个月的选项我的就直接没这个选项。。
991	我才打完电话，滴滴就知道我要去哪里。就离谱
994	我不存在这个问题，全面在天猫买的东西不超1000块钱，也就基本618双十一花点钱，平时基本就几块十几[OK]
995	我被携程杀过一次，车票加价了50块钱。从此卸载携程。
996	我被美团杀熟了 外卖会员比别人贵
997	我被滴滴杀过一次，虽然只有一块钱，19年一月份，我那时候放假回家了，滴滴在我大学所在城市给我捏造了一个单车订单，一块钱，因为我那时候回家了，很明确没有用过单车，滴滴客服一开始说是我给别人登过，我再三确认没有，滴滴表示愿意给我这个一元的订单免单！就很搞笑，给我捏造订单被我发现了，给我免了还成了我占便宜了！我身边也有人说遇到过一两次单车订单好像不是自己骑的，不过不确定，就没深究，横竖一块钱也没啥。我那次是刚好碰到我放假了，回家好几天了在几百公里外的城市外生成了订单，很肯定。打过315电话投诉，结果因为找不到福州的滴滴办公地点无法处理，问滴滴客服，客服说是我无权知道，最后也不了了之。这种订单多起来利润有多大？
998	我爸在美团那天天点外卖，天天被宰[雪未来_泪目][雪未来_泪目][雪未来_泪目]
1001	我iqoo pro 我同事iphone11promax 同时从公司打车到高铁站 我17他21 确实是杀熟了
1003	问题是消费者产生的数据是谁的。
1004	问题是提出来了，解决办法是有的，可就是没人管咋整。我华为mate40pro高德打车，每一个选项都比我的荣耀V20贵1-2块钱，选项区间多了约10块。这谁管？这谁都不管[囧][囧][囧]
1005	问题是查处了能罚几十万？
1007	问题即使曝光，也很难解决。因为法律本来就允许同一种商品卖出不同价格。你去买菜就是最经典的，老大爷老婆婆去买菜永远能买到最优惠的价格，而一个青年男子去买菜，由于他不计较，永远都会贵几毛钱。（来自经济学的价格歧视原理）
1008	问题不是罚款的问题，到底有没有人真心管事，敢不敢跟这种情况做斗争
1010	未雨归兮回复 @苇苇喵 :讲个笑话，滴滴客服后来打电话问我为啥不用滴滴了[doge]
1014	为什么这个时候只有罚款，没有没收违法所得[霜叶-疑问][霜叶-疑问][霜叶-疑问]
1015	为什么要看算法，两部手机拿出来就是有价格歧视，这不是应该平台自证吗？
1018	为什么还没处罚[无语]
1019	为什么非要消费者维权，这种不合理的情况明显存在，政府不能打击么？不能出台规定么？
1025	苇苇喵回复 @未雨归兮 :这种事也太恶心了，把人当傻子耍。我后面除了特殊情况再也不碰滴滴了。
1027	唯品会就是典型，我妈的最高级会员比我这个普通会员显示的商品价格还高。
1033	微经里学的，价格歧视大幅提高生产者剩余，
1036	网络发展的太快 必要的监管甚至是立法都应该有所动作了
1039	万恶的资本家
1041	完全不明白杀熟有啥可谴责的。难道我们买东西时都要卖家承诺绝不给任何人低于你的价格？[尴尬]
1042	外用型宅男滴滴我打车显示的是19，滴滴师傅手机上显示我付的费用是17.3
1043	外卖软件是杀熟最严重的，还有京东我就遇到过同样的产品，我跟我同事能优惠的金额不一样(会员什么的都是一样的)，然后我就打电话给京东，然后给我了京豆[呆]
1044	外卖平台也是一样的
1046	哇偶，难怪学大数据的工资这么高，这必须得高啊
1047	哇。。。一年要打很多车的果断放弃苹果。想半天也没有其他办法来抗争了。除非全**联合起来
1048	推荐飞机车票的互联网购票都由国企运营，然后每日各航空公司上报价格，并且开展一个价格公示表，消费者可随时查看，优惠券满减的时候，明确表明原价与优惠掉的价格，
1049	推广检索杀熟黑名单，从消费者的角度去不消费不使用，自然而然的票务软件会被最终淘汰
1051	同一种软件下三个，买货都知道要货比三家，哪家便宜用那个。
1052	同一时间搜索同样一款产品，“熟客”的价格偏高，还会被推送库存紧张、产品将售罄等不实信息。新华社记者实测发现，关于平台经济领域的反垄断指南发布后，一些互联网平台“杀熟”不改，且套路更深。你遇到过被平台“杀熟”的情况吗？
1055	同一家酒店我订房不含早320。我同事和我差不多一起订房，含早280。
1056	同一个宿舍，同样的外卖，三个人价格分别是9.88，10.88，11.88
1057	同样两款安卓手机，我和我朋友的价格也不一样
1058	同样的路程我以前坐@滴滴 要20以上 昨天有人找我拼车 她安卓手机打车只要13.12 ？？
1059	同样的地点同样的时间打车 苹果是13元 安卓是7元 如果没有两个手机做对比始终都不会明白的
1060	同行监管就是个笑话：只要政府监管力度不到位，整个市场的所有企业就会联合起来一起干老百姓。杭州那智库联盟不就是个大鬼带小妖兴风作浪的典型例子？
1062	同城网订的酒店！不同手机显示不同价格！
1063	通过appstore购买视频会员会比电脑页面贵不少，貌似因为AppStore会扣去一部分作为手续费，然后视频网站不愿承担这个费用就加到用户头上了[辣眼睛]
1064	停业整顿两天ta赚不到的钱估计就和罚款价格差不多了[尴尬]
1067	天下资本都一样，但凡是个科技巨头垄断公司，最后都发现推出新科技产品，还没用大数据割顾客韭菜方便，接着进一步又发现搞金融借贷割客户韭菜更快，于是纷纷披着科技公司的皮，抢华尔街资本金融吸血鬼的活。
1070	天天玩淘宝的消消乐，淘宝给我满共一百多的小东西比别人的账号看贵几十 [doge]
1073	天天测，然后约谈，最后罚款50万，别逗了
1074	天猫超市里买一个东西，买过一次的账号购买是39.9，未购买过的账号是9.9。问客服就是有的有活动，具体情况不清楚
1075	天猫，登录账号比不登录贵很多！
1081	腾讯马化腾的爸爸不就是港务局干部吗，那个年代就可以买望远镜的人，，
1082	腾讯敢不敢给新华社发律师函？要是小媒体曝光不得让别人删掉视频？
1087	特斯垃法务部跟苹果没关系啊，苹果收税只是收虚拟物品的，你在淘宝上买东西被苹果收税？
1090	淘宝亦是如此，同样一个链接，我打开后价格竟然是别人的两倍。[大哭][大哭]
1091	淘宝也有，另一个账号没怎么买东西的，就少几十，我经常买东西的账号就多钱
1094	淘宝同一件商品点进去价格都不一样，通过收藏点进去比直接搜索点进去贵。还有首单减的优惠，能差几块到二十块不等。
1095	淘宝天猫也有，我买过之后才发现有更便宜的
1096	淘宝特价版，点进购物车的商品，过段时间再进去，就会加价。删掉重新加入，就会恢复原价。拼多多，淘宝活动期间买的东西，买完几天恢复原价
1098	淘宝商家还有爱耍小聪明的，把商品的价格定的特别高，一个饭盒上亿那种，就为了在“价格降序”那块儿能排的靠前一点[吐]
1100	淘宝买东西 前一秒首单优惠五块 刷新了一下就只优惠一块了 就那么一秒 绝了 饿了么更是 杀的都十分厉害
1104	淘宝会大数据杀熟吗？
1106	淘宝购物车，手机端清空是5800多，电脑端清空是6400多[疑惑]
1111	淘宝 京东都有 同一个链接我买和发给这个链接我朋友买差几十块[吃瓜]
1114	太皮的眼儿回复 @皿Hushaby皿 :学国外，直接百分比罚款啊。
1118	他们不是在支持国产手机么[doge]
1119	所有系统平台都在做不是什么新闻了别问问就是在缓冲
1120	所以证实了什么时候整治啊？
1122	所以这个视频为什么没有相应的举报机制呢
1128	所以我一年左右换个账号
1130	所以我买机票都是在这些app看看有哪些航司飞我要飞的航线我再去人家官网买[doge]
1131	所以我卷了，不买，就算买几大电商平台比价！
1132	所以说用哪个手机便宜?[奸笑]
1134	所以说啊！国家什么时候出官方的比价软件，我们可以直接对比，[嗑瓜子]
1135	所以能不能罚款狠一点？
1138	所以该去买个最便宜的智能手机？
1142	虽然他们的确有大数据杀熟。但是这个测的不是 这个测是苹果安卓的渠道分成不同。
1143	虽然对比宝岛，一切都能用手机解决，但是真的也引发了很多问题啊
1146	算法行业有一个工种做优惠券发放算法的研究，本质就是给什么人什么优惠券，好听点叫推广，但说实话现在哪个打工人点外卖不用优惠券？
1148	素质极差丨世荣我寻思这种杀熟最后的钱不都是落入那些软件的公司里了么
1149	素食鸽子我在夸克浏览器上看看车的品牌价位，过两天就有广东那边的店给打电话问买不买车
1150	诉讼个P诉讼完确实平价了，价格联合上涨
1152	死心吧，不重伤式惩罚，it资本不会鸟你的
1153	死に神bleach还有新华社也还在关注敦煌那边，只不过是那边没有消息，不是新华社的错
1155	私有资本就是好
1157	说真的一个普通的两间房小店，年利润10-20万之间，如果在商业范围内违法，罚款也会有好几万，几乎是年利润的百分比几十！而一个年利润数亿、数十亿的公司在商业范围内违法，罚款也就是几十万到几百万之间甚至有的也就罚款几万而已，一个小店能够罚的基本维持不了运营，而一个公司却罚的不痛不痒，这就是为什么大公司被罚款也要违法挣钱，因为成本太低！
1158	说实话机票你要举证可太难了，毕竟众所周知机票价格是随时间波动的。你要证明是因为平台/用户不同而被杀熟，起码你得保证查询结果是基于同一时间戳的，也就是说你只能自己构造数据包发过去然后再解析返回结果。但是伪造数据包这种事情，你并不能说它是不违法的。。。。。。
1159	说实话，我发现了，美团饿了么都有这种现象呀，一段时间外卖点多了，就会发现价格越来越贵，就不点了，或者两个平台换着点
1160	说实话，杀熟只是商业手段，并没违法；说龚断先去查腾讯吧，音乐平台早就一家独大了
1161	说苹果用户不缺钱的弹幕真的nt我寻思这个视频主要跟用什么手机没啥关系吧 本来是要反映这种杀熟的现象 到你这嘴里就成了缺不缺钱了？
1162	说苹果税是脑子有问题，还是耳朵有问题，和安卓比你可以说，左边两个都是苹果手机，还特么差两块，税还分机型吗？
1166	说买机票苹果抽钱的也不想想--这特么相当于苹果公司收中国机场的税，可能么？[嫌弃]
1168	说了也是白说，法律终归不是维护普通老百姓权益的。资本家违法如果要付出十倍百倍的代价，那它还会违法吗？如果只需付出不足千万分之一的代价，那它有什么理由不违法？这就是纵容，纵容的结果本质上就是鼓励！
1170	说个好玩的事儿，你用微信多和朋友聊聊以前没买过的东西，打开淘宝的时候有概率会推荐给你
1171	说的好不如做的好，先管管删评论吧
1182	沭之松安卓也是三六九等，我们那天验证过了，一台新的mate40Pro打车价格11.5，和苹果价格一样，一台mate30和一台红米，打车价格却只要八块多，整整少了三块钱啊……
1183	属实牛批，软件上查好了机票，买机票还是官网买吧。真就赛博朋克了，垄断性企业越来越赚钱
1185	守护世界最好的立华奏只是杀熟而已，这都能怪到苹果上？国内的软件商城基本都在50％的抽成。就事论事好吧
1186	手机就是个垃圾东西，个个都觉得很高档，我早不用了，一样过的好好的。
1187	是奕雨鸭[热词系列_知识增加]那我岂不是一直淘宝瞧不起……[热词系列_知识增加]
1189	是时候国家也弄一套算法监管这些企业
1191	是的是的是的。互联网企业就是这样。大数据收于人，用于人[歪嘴]
1192	是的，我在美团一家购买快餐，每次都会涨价。问商家商家说没涨。
1195	事实证明，买苹果手机装逼的人是需要付出代价的[doge]
1199	世界观崩塌了我有一次搜索机票，5点一次，5.30一次，到了6点多，我查询到的价格比原来贵了100多
1200	世风日偷，人心不古[笑]资本主义必然导致道德滑坡
1202	实体也杀熟，你怎么查？商业就存在差价，杀熟这个词本身就是传统销售行业过来的。况且卖的又不是通货，这个价格浮动还在合理范围内。
1203	实名举报飞猪
1205	时遇smile用拼多多找同一个物品，找一遍就贵一点，多找几遍就会很贵，这时候换个新手机重新找一遍，会便宜一大截
1212	神秘人大海回复 @外用型宅男 :你要是用苹果，你会司机收费价格不变，你付的更多
1214	什么时候人民币数字货币出来？建议到时候APP跟航空铁路绑定，信我，到时候绝对不用支付宝微信，，，天天给我推荐贷款投资，烦死了！！！
1215	什么时候订修相关条目的款罚上限，这些人才会怕[doge]。啊b你站着赚钱好吗，爷是大会员，发个积极向上的评论也能删[doge]
1216	什么利润多少，资本家会怎么做，那句话怎么说来着[妙啊]
1218	什么大数据，别听杰克马吹，就是忽悠引诱人消费，你让他赚了钱，回头还得夸他真实在。高，实在是高
1220	谁要是开发了个反大数据杀猪的软件会不会被抓进去坐牢啊[抠鼻]
1225	上周末，飞猪订酒店120左右，美团140，同样的酒店，万豪旗下的，在成都的酒店，同一家在不同平台差距上百都有[无语]
1226	上堰王氏有的，你用这个买的商品其实都调高过价格了，我过年被坑过，买的几样东西姐姐帮我查了一下发现差价少则两倍多则四倍
1231	上次在携程订酒店，同酒店同房源，我的号就是活生生要比同事的号贵10几块一间[tv_呕吐]
1232	上次我用电脑上某哪儿，不登账号，查航直接显示没有相关航线（事实上有[翻白眼]）
1233	上次我还看见过一个曝光美团杀熟的视频，有一次我自己用新旧手机也对比过，确实有这种事情
1234	上次京东送个一天会员，有个运费券，然后我购物车里面有个京东自营的商品，原价45元，运费8元，后面那个运费券过期了，现在价格变成45+8，51元了，我用其他人没来会员的京东看了，别人都是45元，包运费的[疑惑]
1235	上b站盯你信息差啊
1236	上b站盯你回复 @明年就可以上初中 :有人看见平台能买就买了，这批不看官网的就是信息差啊
1240	山青-_-和tx控股关系倒不大，反倒不如说是资本通性
1242	啥也不说了，我最近都被滴滴恶心到了，虽然打车方便，但我还是希望他能倒
1243	啥时候把资本家挂路灯上
1244	啥，啥意思？我买同一个东西，价格竟然会不一样？我去，这太恐怖了吧！
1247	杀熟这种行为你怎么判定？实体店就不杀熟吗？你法律规定禁止价格歧视了吗？
1249	杀熟一个，罚款30亿，欢迎举报～
1252	杀熟算啥，跟我合租的室友跑外卖的，去年一年单价下调四次，今年刚开年没出正月又降一次，美团真狠啊
1254	杀熟确实恶心，但根据你的喜好推送一些好康的这点却值得好评，国外的一些软件在这方面尤其突出[doge]
1255	杀熟纳入消费法，一发现举报直接赔偿原价7～10倍价格，让专业打假的薅羊毛以恶打恶[doge]
1257	杀熟就杀熟呗，我们连隐私都是透明的，杀熟又能厉害到哪去啊
1258	杀熟就罚款一千万起，至少能减少80%
1266	杀个屁的熟，把所以的优惠都拎出来比下就知道价格一不一样了
1274	杀的好[吃瓜]反正我是最烂的手机
1275	杀吧，马云买瓶水建议50万[呲牙]
1281	三级价格歧视在本世纪实现了
1282	三部手机上淘宝搜同一家店的东西，价格虽然一样，但是优惠各不同，算吗
1286	锐可Reek你忘了@飞猪
1288	如今的支付宝已经不是马云的支付宝了
1290	如果是苹果和安卓手机对比，这不存在什么杀熟，因为苹果会向app收费，app只不过转嫁了这部分费用给使用者，所以我说苹果手机垃圾的原因就在这，它垄断了，你拿它怎么办？
1291	如果人为把社交功能和消费功能分开，分两部手机、两个号码，一部用于社交、信息浏览和储存等，一部消费专用，可否避免大数据过度挖掘、利用个人信息？
1293	如果国家不出手，根本没人会管！老百姓就是一大群羔羊！只能任资本家宰割。
1294	如果不停，就关停服务器呗。
1295	如果不登陆账号就查看app内信息，是否一样[翻白眼]
1296	肉松到底松不松楼上被删评了。。吓人。。
1298	任何法律白纸黑字制订再好也没用，关键在落实，但是相比能获得的利益，罚款只是很小的一部分，虽然有可能影响声誉，但是不这么干竞争不过其他企业
1299	人民的新华社
1304	让平台自行无罪举证
1305	让你吃到真正滴石灰。这个我熟，我把外卖全部点到自己快吃不起了，同样的套餐越来越贵，去店里吃根本没涨，美团同时收割我和骑手和店家。
1308	然后呢？你们做出了什么吗？只是罚款吗？
1317	然并卵，就算罚款也是几十万，这对于一个企业来说简直是在鼓励作案一样[辣眼睛]
1321	确实，我和同学查看火车票的价格都不一样
1322	却又像风捉摸不猪。要警惕的东西太多了 单单是我们吃的外卖 配送距离 起步3公里 经常超过5公里 可用实际地图一查差距能到1 2公里 真的离谱
1324	全球的机票价格不都是实时变动的吗？
1328	去淘宝、JD花个1个小时看个音箱吧，接下来每天都是音箱广告的推送，除了手机通知栏的推送，QQ空间等平台也是这广告推送。去美团看一下中午吃炸鸡还是煲仔饭，接下来每次进入美团，全是炸鸡和煲仔饭的各种店家推荐。。。现在没事我都不敢点了
1329	去年出差订酒店，我订是248，同事订是198[无语]我现在每次出差订酒店都叫我爸妈、同事帮我看一下
1330	去年八月我买机票，同一航班的机票 我是黑jing会员 买的票比不是会员的贵了50元左右[呆]
1331	去年9到今年1月 都是快车同样路线 有30。33。36。38。 元旦最过分47块
1332	去年12月我从成都去上海用我哥的支付宝看飞机票2500左右用我的1600左右。。。。[囧][囧][囧]
1333	去哪网就是，我都卸载了
1334	去哪儿一直在杀熟，同一家酒店不同人价格不一样
1335	球球了，感觉管管这些线上大平台吧，不仅仅是杀熟，可以说网购平台和物流合起来宰客户，经常有各种丢件的情况发生，还找不到地方投诉[翻白眼]可以说现在网购只敢买一些普通的生活用品，整这么半天最后还不是变成线上超市了。。。
1336	丘吉尔的打字机hxd，在中国，罚款不是重点，这个是好事儿，至于为什么，b站有人科普 [OK]
1337	请问老人机买机票多少钱
1338	请更改处罚标准，按照违法企业的总价值来进行百分比的处罚方式。这样他的公司越大，对他的处罚就越狠。要让企业不敢去违法，现有的处罚对大公司是九牛一毛的。
1340	请大家给朝阳定福庄水利水电学校事件曝光一下[无语]
1342	青川崎只是罚的不够多。一旦罚的超过赚钱速度就停了。比如罚的款可能要杀熟几年才能赚回来。还不能保证不被继续罚款。
1344	亲身体验过京东和淘宝的杀熟，朋友的plus再领券买的价格比我的领券后买的价格还要贵。天猫超市，越是老客户，领的优惠券越少。
1345	亲身经历，由于外卖点的比较多会发现饿了么存在大数据杀熟，以前没发现，有一次我点餐一家长吃的店铺，好像觉得价格贵了，就看了一下我另外一个手机，发现确实存在，只是更加隐蔽，不是标的价格，而是在补贴上面，饿了么有一个活动叫百亿补贴，其实价格和以前差不多，就是提价在降价（一样），但是你经常点的商铺补贴会少，你如果几次不点这个商铺，补贴又会高一点，你一旦点了，补贴又少了，大数据太变态了(▼皿▼#)，不知道这种行为是不是大数据杀熟，是不是违法的
1346	亲身经历，携程旅行订房，我新用户下的，朋友老用户，他比我便宜几块，就是原价都是不一样，没有加优惠
1354	前排，你不用Apple支付，苹果就不会抽成。你买票用的肯定是微信 支付宝支付，苹果不会抽成。苹果抽成只限于应用商店的应用内购买的订阅服务以及各种应用内道具，请大家擦亮眼睛，不要被误导视线。
1355	前两天真实体验了。同一家店同样的外卖我用自己手机点运费1块，我男朋友点运费就变成了7块
1356	前两天我在淘宝刚买了一个东西，比我媳妇看到的便宜40块钱，一个店铺一样的东西一样的规格。
1357	前两天我朋友在QQ用语音给我说去吃烤羊腿，接着美团就给我推送了[吃瓜]
1358	前两天我们聚餐，就遇到了，高峰期人多，我们还要叫两辆车，大家都在叫，发现同样的路程价格差了三块……根本就是看人下菜碟
1360	前几天去看电影 美团上17块我还用了红包 票打出来15块 md 那我不是现场买更好吗
1361	前几天出差机票搜了几次，直接从600多涨到800多
1362	前段时间过年，我想和朋友晚上出去开黑。准备在美团订个电竞酒店，然后就发现一样的电竞酒店我朋友的要比我的便宜一百多块两百块。我俩的账号都是一样的账号什么都没开。后来我打了客服，美团客服只是说美团绝对不存在大数据杀熟的情况，可能是你朋友开了美团会员什么什么活动的巴拉巴拉我也没听懂。我一想跟客服说也没什么用。就说一句也不是你能决定的事，打扰了，我就挂了。后来，我就把美团卸载了！
1369	其他软件不清楚，如果是美团，苹果订房很可能会比安卓贵上几十块到一百多不等。
1370	其他就不说了，定位在古玩城和定位在差10米的某店家，打的价格差3倍，我刚刚发现的，要笑死了哈哈哈。
1371	其实最好举证的是我们商家，我常常发现苹果手机的顾客价格高百分之10到20，但是我没办法告，一旦做了就全网封杀了[辣眼睛]
1372	其实直接禁止“大数据”收集信息是最好的办法
1373	其实要避免被杀熟只需要不登陆(不留本地cookie)，app不能获取IMEI就可以。问题是哪个app可以允许你在结算时才来登陆呢？淘宝不登陆都不显示商品的。
1374	其实我真的不懂，为啥罚款不以该企业的年收入或者年利润来衡量，你说这样做只是打击企业改正这种行为，但是不同不痒，我从中赚的比罚的多，我还遵守这种法干嘛
1375	其实说白了，解决方案就是下载两款功能相同的软件换着用呗[吃瓜]。
1376	其实杀熟很常见，只不过反着来了，比如上街买个菜，常客不用砍价都会便宜一点，互联网平台杀熟学的大卖场这些，开始以优惠给你点甜头，养成习惯后再提价
1377	其实企业用心良苦，想让国人多用国产手机[doge]
1378	其实买东西没变，因为我有好几个手机，换着上淘宝，购物车里的东西价格都没变呀
1381	欺梦狂回复 @老秦人不绕舌 :公用手机判断好面子，不会拒绝。
1388	苹果有苹果税，就像美团抽成一样……所以价略高
1389	苹果有抽成，这还怪苹果？苹麻烦去了解一下你下的这些软件，这些互联网平台到底有多杀熟，平台原因最大
1393	苹果游戏和商品充值比安卓贵[妙啊]
1395	苹果已经调整收费了，是部分APP不做调整
1400	苹果手机有抽成比例，比安卓高，所以商家也无奈，要么商家买单，要么客户买单，要么国家给苹果下令禁止收过路费
1401	苹果手机用户都是有钱人，不在乎一块两块的[doge]
1402	苹果手机苹果要抽成呢吧
1403	苹果手机买火车票抽不抽成
1404	苹果手机里的软件收费比安卓手机收费高，其中一个很大的原因也是苹果收取高额费用导致的！还有人吹用苹果手机好，不卡，羊毛出在羊身上，还是从你消费的东西里把研发的费用要回来。
1405	苹果手机加钱我觉得合理[doge][doge]
1406	苹果手机的话，有些是因为苹果也要抽成的才高的一点吧
1407	苹果手机本来就有苹果税呀！这得问苹果吧
1408	苹果收过路费，这个是没法改变的，只能不用苹果产品。所以我转投华为阵营了，用惯了也挺好的，而且很多APP和UI的designer都投Android了，相信Android机未来也会越来越好。
1409	苹果是真的大数据杀熟，我买平板抵扣一百五，别人的账号就没有抵扣。
1413	苹果价格比安卓贵一点。什么原因心里不明白吗
1414	苹果会收取手续费or抽成导致价格可能会比安卓贵我知道，可同样是苹果手机价格却不一样就很明显是平台在做法[辣眼睛]
1423	评论一直删
1424	平台通过你的搜索或者点击率，通过大数据定向推送广告或者相关视频，算不算违法？
1429	平常点餐你都能看出来。它会根据你的人际关系和日常消费习惯给你量身定制价格。如果你日常消费很高。你基本上收不到免费的优惠券之类的东西。如果你从来不用它，或者极少使用，你的优惠券，抵价券，叠加券能积攒很多。
1435	拼多多有些账号有黑卡可以有些折扣[辣眼睛]但有些没有，这算不算侵犯消费者的权益啊？我俩账号，一个能点黑卡，一个没有
1438	拼多多，我和同学搜同一个商品，他的结果比我的要贵几块钱
1439	拼多多 携程 美团等等：欸，你能把我怎么样 接着奏乐接着舞[doge]
1440	漂亮，新华社杀疯了
1442	朋友们，我有个疑问，之前电脑进水了，到学校修电脑的地方，修理的人拆了后盖，然后让我拿回去自己晾，过了几天后找他把后盖螺丝拧上，收了我四十，想问下合理吗，在我看来就是动动螺丝，某大学
1443	哦我懂了，用便宜的手机型号来买，
1444	哦啦玛哈饿了么比美团还骚，我第一次点进去是10元，没买；第二次还是10元，我又没买；我退出来，他给我发了和通知，三元，然后我忍不住就买了[笑哭][笑哭]
1447	年前美团的8元换10元的优惠券。。。。[OK]
1449	年年揭底大数据杀熟，这都快变成你们的保留节目了，反正也整顿不好了，不如以后专门开个板块吧，也省得记者到处找题目了[辣眼睛]
1450	你真是条汉子[打call]新华社啊[笑哭]给大佬递茶[鼓掌]
1453	你有什么办法？他们是地主，不管你怎么制裁，曝光，土地还是他们的，土地上的利益收获还是归于他们。你又不可能换个地主，或者新增一个地主。
1454	你永远可以相信新华社
1455	你永远可以相信新华社
1458	你以为是大数据“杀熟”？其实背后的原因令人暖心[doge]
1459	你以为软件数据是阿里腾讯两大系，实际上只有资本系
1460	你想啊，滴滴全国那么多用户，每天成交那么多单，而且也没人会去告大公司，就算赢了，罚滴滴几十万，然后用户该打车还是要打车，滴滴大不了换一个名头，限时优惠什么的，该赚钱继续赚，
1461	你说大数据杀熟就说大数据杀熟，拿两个苹果一个安卓，不说没控制变量，说苹果比安卓坑。你的数据呢，做测试不需要大量数据？如果没有请不要瞎说，这么看也是黑苹果啊。
1462	你脑袋可真光滑回复 @聆歆墨 :还有更离谱的 关键词搜东西价格排序有些产品不显示找不着 我都加车了还找不着
1463	你那是罚款么？你那是廷杖吧！
1464	你们自己要用的嘛[偷笑]不用不就没事儿了！
1466	你们看看自己的淘宝省钱卡会员， 一个月多少钱，我保证你跟身边的朋友消费习惯不一样的，会员费一个月的钱不一样。我的小号省钱卡月费比我的大号要贵一块，我同学省钱卡月费比我贵7块。
1476	你罚50w，人家把所有价格偷偷调高五毛，一天赚的比你罚的多多了。
1479	你常用就不给你优惠，你不用一直给你扔优惠券。
1480	你才知道阿？什么狗屁大数据专杀熟，罚他千亿
1481	你不用，我不用，它还能杀谁的熟？
1482	你不几亿几亿的罚款，啥法律都不顶用
1484	你别用啊！没叫你用，请你立马卸载[滑稽]反正不缺你一个
1486	你百度搜的，淘宝会给你推，你淘宝搜的，百度也会给你推
1487	嗯------还有老是订一家的外卖，配送费会慢慢涨起来
1492	能算出来我多一两分钱都不乐意付吗？哦，我不打车
1494	能上升到法律层面就更好了[无语]
1498	能关注下北京16岁男孩遭霸凌吗，到现在没有一个新闻平台报道[保佑]
1501	能按百分比收入罚款么，至少让他把赚的钱都吐出来好吗
1503	难怪现在淘宝的衣服越来越贵
1505	难怪打车越来越贵[无语][无语][无语]酒店也住一次贵几十[无语][无语][无语]
1508	南川醉红完了我用携程[笑]
1513	那又如何呢？即便被曝光又如何呢？还不是不会改变
1514	那些同类的APP轮着用，隔段时间换一个，还会被杀么
1515	那些说苹果抽成的先了解一下好吗。非虚拟商品不会抽成。（动动脑子。难道你tb jd wx买东西转账都得抽百分之十几三十？
1516	那些说还买苹果吗的弹幕我真无语。你买一台海外安卓手机试试，google服务用不了，更抵挡不了国内的流氓应用。这是苹果的问题？
1517	那我以后专门卖一台二手599的安卓手机付钱[哈欠]
1518	那我希望明年的人大能够提出有关于大数据杀鼠的相关法规，也希望提高处罚力度！！！还我们一个平安的生活，还我们一个有隐私的生活！！！
1520	那我拿诺基亚点滴滴是不是可以白嫖
1522	那天天曝光，怎么就没有处理呢
1523	那天和同事打车去机场，滴滴，我们一起用了滴滴打车，他的滴滴比我便宜不少，我才发现这个问题
1524	那是不是用不同手机搜索价格不一样
1525	那平时用贵手机，买东西的时候用便宜的呢？
1528	那可不，查一查罚款20来万。。。不是搞笑是干啥呢
1530	那就开放国外平台进来吧，M D贸易保护就保护出来个这？
1532	那个淘宝店不是会员比新客买东西贵？会员费就是白交了，只怪自己社会阅历不够。
1533	那个砍一刀的算吗[疑惑]每次买完东西都会推荐一个价格更便宜的出来，气的我又多买了几件[doge]
1535	那反过来说，我用最便宜的手机买东西会不会比较便宜[思考]
1536	那安卓系统的苹果手机怎么算？[doge]
1537	哪怕给他们的罚款多几个0也不至于这样，尼玛罚50万不就是……
1538	某某：这罚款还不够我杀熟的[嗑瓜子]
1540	某东，没买12前，5700+，买了，在路上了，5400+，取消了重新下单，又5700+，懂了吗？
1542	某宝把这个叫做“千人千面”，不同人搜索同一个东西商品是不一样的。觉得你有钱就给你推荐价格高的，觉得你没钱平时买的东西便宜就给你推荐价格低的。
1543	某wis微信商城里面，面膜一盒比淘宝还贵20，花100块买会员卡后才跟淘宝一个价。
1544	墨染l我都是多装几个同类软件养蛊[doge]反复横跳，哎，大数据你猜我在不在你家买[傲娇]
1549	明年就可以上初中回复 @上b站盯你 :有什么信息差啊？官网不应该是第一手信息吗？这样更应该去官网买了呀
1551	皿Hushaby皿建议企业也能进大牢，犯事就罚款（罚的还不一定有赚的多）成本太低了
1552	棉花纳税大户只是问哈，不是杠，不打算用键盘监管
1554	米老头的摇摇车正常，前天我坐滴滴，我和我朋友在一块我手机显示的是25我朋友18。都是安卓机，只不过我经常坐滴滴。
1561	美团真不行，我之前外卖因为一个吃拉肚子的盒饭退单了，结果直接把我账号封了，原因说无法告知[呲牙]
1563	美团用了两星期，亲眼看着一顿饭从20块钱涨到30，我直接卸载[脱单doge]
1565	美团外卖真的是恶心
1566	美团外卖也是，一个我经常用，是自己写的地址，配送费经常8块9块，另一个是自动识别的地址，不怎么用，配送费4-6块，明明自己写的和自动识别的都是同一个地方
1567	美团外卖杀熟贼明显，同一家店同一个商品贵7、8块[无语]
1568	美团外卖券，以前5块钱买10块钱的会员券，现在8块[尴尬]。我说杀熟，人家振振有词。[尴尬]
1569	美团外卖会员以前买额外包五折，好嘛，现在给我变成八折，拉倒吧，????用饿了么去了
1570	美团外卖会员懂得都懂，为了省钱，我都隔两个月再买会员[辣眼睛]
1571	美团外卖的那个会员加卷，之前是二十的卷十块就可以买。后来好像成了20快买20的卷，然后打85折，我只能说，你这样买你这个卷还有个屁用
1572	美团是真的，那个加油包，你要是几个月不用，就变成五折，你要是买的频繁就给你升到八折
1576	美团旗下所有APP都是一样的
1577	美团垃圾！同一店铺、同一收货地址、同时搜索，我同事可以点16元套餐，我这根本搜不到这个商品，最便宜是18元套餐。以上信息100%属实
1579	美团京东才是杀熟。外卖樾点越贵。点个汤粉二十几，在店里吃8块。5元红包还是4元买来的
1580	美团津贴，饿了么补贴:我没有用大数据杀熟，我还给用户随机减免金额！[OK][OK][OK]
1581	美团和饿了么我都换着号用，家长还不理解我这么做[热词系列_害]
1582	美团和饿了。长期不用和长期使用，他的会员价格是不同的
1583	美团饿了么上去
1584	美团饿了么滴滴携程，我都体验过杀熟
1587	美团打车，我第二次打比我妹第一次打贵了10块，就离谱
1589	美团40块的钱县市班车车票票车站打印出来面额35块真的是狗东西
1598	每次打车，我跟我女朋友都是打开滴滴，同一个起点和终点，同一个时间，没有一次价格是一样的。
1599	媒体：调查调查 资本：有恃无恐 群众：翻译翻译 (翻译：完了，某个地方又得从我们身上扒拉回来！老溜溜球了)
1600	没有用的，就像以前公司迟到罚款一样，现在不罚款了，扣奖金，现在是直接价格有差异，以后人家就搞随机红包了
1604	没有什么是巨额罚款解决不了的，如果有就罚到它破产[OK]
1605	没用的，谁都拯救不了资本。
1608	没用，该怎么样还是怎么样，隐私该收集的一样收集
1610	没想到啊，我一直以为手机购票的票价就是跟售票厅里的一样，涨见识了，居然还有大数据杀熟这种操作。
1615	没啥用 随便曝光 随便罚 按照法律标准顶格罚都不怕 除了这些软件 我们没有别的软件可以用 有的选？
1619	没几个官方账号敢来评论的[妙啊]
1620	没法律管你拿他什么办法
1621	没点开就想骂美团了……因为我有两个美团外卖app 登两个号，每天吃饭都会发现一个便宜一个贵 无语
1622	没错，特别是拼多多，杀起来特别厉害
1624	猫猫的巴扎嘿只要在互联网公司做过的，都知道里面到底有多黑，还真有人以为这些大公司是做慈善啊，近些年阿里系做很多慈善公益，表面形象做的是真不错，很多人都说良心企业，我就笑了，坑你100块，10块去做公益，你一个劲夸我是个好人。不否认阿里公益做的是不错，但是良心企业去吹捧没必要，互联网公司就没有不坑的，而且都几乎处于垄断状态。有时候你觉得不是垄断，可是你真的换一种选择的时候，又发现好像没什么可以选择的。就像之前的小品，两个人一起卖水果，一个人故意把价格卖很高，那另一个人水果就好卖，最后两个人分钱。现实也是一样，有时候的另一种选择，也是早就安排好的，故意弄差点，让你用完发现卧槽还不如原来的。
1625	买外卖下几个app轮着用，因为同一家店app不同价钱不同，订酒店几个app比着买，同一家酒店不同app价钱也不一样。
1627	买票都用12306从不用其他软件
1628	买了个蓝牙耳机，买完第二天就降价29。还是同一个手机[笑哭]
1629	买机票，看到1000块钱，点进去支付，就显示1000的没了，退出去一看，就1050了[笑哭]
1630	买火车票有官方的12306，机票呢[笑哭]
1632	买高铁票和12306价格一直是一样的吧
1633	买电脑有句话：生人杀一半，熟人大满贯
1634	买电脑，哥们手机京东显示有个优惠券便宜600我这个手机死活找不到那个600优惠券。。
1639	马赛克的独家频道实体店，价格是透明的，每个人来都一样。而手机是隐私，每个人每个价相互之间不会有太多的沟通和交流。就算有也只是在你的圈子之内，不会有什么差异。放扩大到收入阶层你就会知道，同样人家9.9买全家桶，你需要99块。不过你永远不会知道人家花的9.9。因为你不在他的消费阶层。算法能够判断出来。这并不是单单是手机的问题。是算法根据你的消费行为给你量身定制的，你逃不出它的手掌。
1641	麻烦罚重一点如果举报成功直接按买到的商品价格1000倍的罚
1643	妈的，以前是真的过分。汕尾到深圳，第一次45(低于铁路官价)第二次55(和官价相同)第三次直接75第四次直接破百，主要是我妈和我以前没坐过高铁动车，来来回回考虑了半天。携程APP打开了又退，退了又打开。就亲眼看着价格飙上去…垃圾携程…[再见][再见]
1644	旅行到宇宙边緣有解，禁止软件获取用户信息，除了定位功能，用户信息只能够国家管理，然后国家经过伪装的信息提供给其他软件公司（比如用户名用数字代替，并且随时间推移随机改变）
1654	凛泠丶回复 @夜夜至天明 :变动，我每次看都是往上变动，从来没有越看越便宜的，而且换一台手机再看又是便宜些的[辣眼睛]
1657	两个手机，一个安卓一个苹果，装了七八个订票软件，
1658	两个蓝biubiu当时是很生气，可打客服又能怎么办呢？我也不知道合适的投诉通道！我只能选择让朋友付钱啦[doge]这波不亏
1661	连推广广告现在都是定向手机品牌的推送了，什么你的oppo手机能这样赚钱，你的vivo手机能这样赚钱，你的xxx手机能这样赚钱你知道吗[呆]
1662	俩手机，同一时间同一个位置同一个店，费用不一样，当时我就麻了。
1663	利用杀熟赚了几百万甚至上亿，被抓到了罚款50万，换你你干不干？
1664	利用大数据薅羊毛，全国一人出一块造就一个亿万富翁不是梦想[OK]
1666	立法把这些平台的算法源代码给政府分析监管吧。别说不可能，微软Windows都能把源代码给了政府了。
1670	雷佳音我在淘宝上面买同一件东西，我点击购买次数三次，但是没买。他把我的运费险价格从一块钱涨到了三块。
1672	老秦人不绕舌前台嘛，系统可能根据这手机接听电话多判断为机主业务繁忙不差钱[doge]
1679	来几个黑客大佬黑进去收集证据匿名举报[脱单doge]
1680	来杯急支糖浆加冰[doge]程序员们也不是混口饭吃，真正的问题出在资本家身上
1682	垃圾大数据，分析不出记者。
1686	夸张的说，每发现一次，老板抓去拘留24h一次，肯定就没了。目前还是处罚力度不够，每次罚的钱还不够给员工发奖金的呢。
1690	圐齾圙投诉很难，我打算投诉拼多多，然后发现验证码都收不到，12315的电话都打不通，打12345的，最后还是拼多多的人[辣眼睛]
1691	空城し[呲牙]解决办法不用手机
1692	坑了2000万，罚款50万还是顶格，傻子才整改！！[调皮][调皮][调皮]
1694	肯德基外卖没人管么，单价比实体店贵0.5-1元[辣眼睛]东西贵了还另收派送费
1696	可以起诉吗？
1697	可以罚款到以亿为计量单位吗？不痛不痒就是纵容！
1698	可以敦促友商举报，发现杀熟重罚，罚款1～10%奖励举报者[辣眼睛]
1699	可是这个差价又不是特别大 那为何要杀熟呢？ 为什么不把安卓的价格也抬上去呢？ 如果差价较大还说得通 有钱人多付一两百 没钱人付个原价 那么商家此时手里既有富客户 又不会因为过高的价格失去穷客户 。 问题就在于 这个差价 几十块钱。。。穷客户也是大多数能接受的吧 那做这么个杀熟有必要吗？岂不是留了个马脚？ 会不会是因为苹果商城的抽成问题？
1701	可能是我早已麻木，已经不震惊了[呆]只是好奇这些恶心的资本家会用怎样漂亮的包装来掩饰包装自己干的恶心事
1702	可能是我不太懂，像火车票长途汽车票都有个官方平台售卖，所以十分放心。但是机票吧，每次都能跳各种各样的平台，然后找便宜的。
1704	可否由国家成立一个大数据监管平台，企业和机构收集和使用大数据强制报备，防止滥用
1705	科技到底是为了造福大众还是方便资本更好掠夺。
1707	靠群众监督啊，假货都有退一赔三，这也来一个，你看那些“老客户”不得开心死
1708	看完之后，今天刚好在外边出差，我两个手机点开美团，同一家酒店两个手机两个价格，虽然只差了3块钱
1710	看了弹幕，建议这些互联网大地主花点小钱请波水军，把价格差异的原因推给所谓的苹果系统抽成，反正看弹幕不清楚苹果抽成的人大有人在[偷笑][偷笑][偷笑]
1711	看来以后网上买东西，还得买个便宜手机。
1712	看来淘宝给够钱了
1716	看看政府能管住资本平台还是资本平台牵制政府
1719	看到这个我想说个我经历的事，我平时用一个视频App看剧听音乐，一直是游客身份。有一天我想收藏就login了，结果在这个App听了几首歌，返回另一个App（我就不点名了）那个App推送的是我在上一个视频App上听歌的歌手。我当时挺震惊的，因为两个App完全不相干，而且两个App上login的邮箱都不一样，就是完全想不到它们之间是怎么联系上的。后来想想，可能是手机把我信息分享给App了，手机有能力把用户信息共享给所有你手机里的App。用户真是一个行走的大蛋糕，话说我用的是苹果。
1721	看到新华社突然发了这，??突然想起来一件事，防护林那事怎么样了，还有上次锤的那个长江口空城
1722	看到我请提醒我早点睡罚款不是目的，搞大了是要约谈的，只是资本家嘛，连自己的上吊绳都愿意卖。只是
1726	看窗外的血我觉得这种不是很大的价格差异也很正常吧！毕竟平台做服务，各个平台的服务费用不可能百分之百一样吧！
1730	开团开团，新华社开团了，快跟
1733	卡哇伊的镜华但是后面对比俩个苹果时差了2块是为何？
1734	君不见君ゾ少买iphone，朋友出去玩一趟，比我多花几十，很不开心，他气死了。打车、住宿、外卖。。等等都比我贵。我用的是老Mate20pro。他最新苹果12pro。杂七杂八加一块不少钱
1735	君不见君ゾ不愧贵族用的，以后不敢买iphone了，不光外卖大数据下价格高都跑不掉。除非不用App。破安卓笑死。我朋友以后不敢用苹果打车了
1737	据说腾讯还根据游戏数据绘制了玩家一个什么轮廓图忘了，专门搞这些人。
1741	居然被你们发现了，下回我的APP里多写一条GPS定位一样的手机显示一样的钱数，你们还能发现我大数据杀熟？
1742	就证明问题是存在的呀。现在该去整改啊。不能局限于罚款。还可以责令下架维护，bug修复，软件天天更新怎么不更在这头上。app关闭几天，要求登录界面贴出声明“响应国家xxx法要求，本软件于xx-xx时段停止提供服务，予以维护。”整顿几次，指不定日营业的下滑更会引起重视。
1743	就这? 你知道相差一倍的大数据杀熟么？ 途虎养车。 我手机里做个小保养要1200，同样的东西，我用女朋友的注册只要450[辣眼睛][辣眼睛][辣眼睛]
1744	就在昨天，美团外卖上别人安卓点乡村基只要13rmb，我苹果同样套餐要22！同一家店，没优惠券！
1747	就算知道这些也没用，有多少资本在这样做我们心里没点数吗，能动得了？
1748	就算价格一致了，也很好做手段，可以把价格都抬高，然后给初次使用者发减免卷之类的，要杀熟的就是涨价后的了。反正总有逃避的办法
1749	就算罚款500万也不及摆企业负责人进去行政拘留5天好使
1750	就是缺少监管
1753	就是罚的不够狠而已，不是什么大问题。只要举报一次100万，就解决了
1756	就几十万的罚款就是挠痒痒，你不罚个几亿几十亿，他们还敢！
1757	就滴滴，同样起点终点，我用了9折券，还比同学啥都不用，要贵好几块钱。这事金额不大，但它就是恶心。
1759	就不会多准备几个手机微信，多注册几个微信，和平台账号么[doge]像我，什么日用品都是0.1，1.1一件一箱往家里搬，各种优惠用到手软，这些个平台在我身上血本无归[doge]
1761	警告要有用，那还要法律做什么
1764	经典美团，配送费随便加
1765	经常坐滴滴的表示，一样的路程，比室友价格多10块（我的30他的20），
1766	经常在买东西的时候和同事手机对比价格同一款产品，同一个平台，同一个时间，价格不同，经常碰到。
1767	经常滴滴，俩个手机的价格就是不一样。真炒蛋
1771	京东确实有关于数据杀熟的岗位[撇嘴]
1773	禁止软件获取账户信息，比如打车，只能计算路程，发布价格，只能获取用户的地址，不允许软件获取手机用户的其他信息
1775	仅代表个人观点，价格不一致就罚，价格区分就罚，多次不改的直接负责人负刑事责任，呼吁尽快立法，抓一批典型出来严惩。企业应该靠创造的价值赚取利润，至少或者不应该靠价格歧视来获取利润。
1778	金皮卡卡英雄王外卖机票这种苹果是没有抽成的
1781	今天在饿了么买饭29，去美团一搜同样的饭是22，绝了
1782	今天也测试了滴滴，10个手机10个价，最离谱的是前台专用vivo y3那种几百块的手机比几千块的手机打车费贵4.6..6块不等，可能判断是老人机，能宰多少是多少[嗑瓜子]
1783	今天美团客服打电话通知我，送我一张8元无门槛优惠劵，大伙儿帮忙分析分析，有没有坑等我跳。
1785	今天罚款了，明天将杀熟比例调高[doge]
1786	今天戴着长沙国金中心花了两千多修的表，开福特翼博去菜市场外买了半扇青县的羊肉，回家路上变速箱坏了，很生气，把车砸了，反手买了辆英菲尼迪QX60，回到揭阳钢筋修筑的家，我打开猎聘想投简历，开屏时说我的手机需要垃圾清理，可越清越卡，我怒不可遏，突然有些头疼打开UC浏览器搜索治疗方法，加了医师微信，买了两盒特效药，吃完药打开电视，看见老神医又做出了违背祖宗的决定
1787	今天，滴滴又绕了远的线路，多赚了我五块钱[微笑]
1789	借一下楼，打扰一下，请更多人发到新华社的B站和微博打着文化交流的名义，行偷窃中国传统文化技术之事。 景德镇的专业院校如景德镇陶瓷学院，招了特别多韩国留学生去读硕士博士，根本没发现任何传统陶艺的保护，“陶溪川”（当地搞的陶瓷、旅游相关基地）也有一堆韩国教授开工作室； 学苏绣、学中医、学绳结艺术；2012.5-2018年韩国传统文化大学的师生和中国丝绸博物馆合作，复原“嘉兴王店出土明代丝绸服饰”，借此学织金、丝绸技术，2019年丝绸博物馆和韩国文化财厅就办了半年韩国服饰展。 与此对应：回去就把汉服的双领口申请外观设计专利，改口叫韩国陶瓷、韩国刺绣、韩医、韩国结，进行申遗，包括织金、丝绸技术岌岌可危，称自己是丝绸之路起点。在外网，韩国网民成立vank团体，有组织地集体抹杀中国文化，成为韩国文化！ 早有前科：韩团借文化交流在中国学一套扇子舞中国舞，回去就剽窃中国元素在Kpop表演这种舞。四川自贡…
1790	解决办法：1.不用苹果手机；2.注册个小号使用；3.线下购买
1793	叫你们新华社张扬出来
1794	交完罚款继续杀，罚款50万盈利5000万伤到谁？
1795	讲真的你罚款罚的不是企业的钱而是用户的钱
1797	讲个鬼故事，之前在办公室和同事讨论京东plus 会员，他开的送爱奇艺，我开的时候没有，我们就在那随便讲了几句，哪知道突然一个短信过来说给我解释为什么我的没有，看完惊的一身冷汗，这特么是什么时代
1798	讲个更恐怖的故事，这些宰人的软件，美团、滴滴、pdd，全是有tx控股的[抠鼻]
1799	僵尸超回复 @Poseidon-Q :而且滴滴之前公关说是因为Apple抽成，但其实打车，叫外卖这种的服务走的是支付宝，完全没有调用App Store的支付，根本不存在Apple的抽成，完全就是滴滴自己杀熟行为
1800	建议自己去拿两个手机试嗷，我刚随便看了一个旅馆，差了47（一个137，一个90[疑惑]）
1802	建议增加一条，检测出大数据杀熟的企业，没收整个企业，归于国家所有，且公司高层，经理级别以上10年起步，职位越高时间越长。你不好好做生意，就交给国家做吧，直接国家来做得了，这样就可以了嘛，一年突击抽查一次，时间不固定，这样它还敢杀熟我不信。
1804	建议以后对企业的罚款按照比例来，比如年收入的百分之二十，或者自成立起总收入的百分之五
1805	建议信息验证登陆国有运营，网络实名制，然后数字化货币搞起来，取证会容易很多[doge]
1807	建议推行公共诉讼，采取用户集体诉讼，企业赔偿按诉讼用户数进行赔偿。
1808	建议提高罚款上线，50万改成50亿吧
1809	建议杀熟非法所得全额退还加补偿加罚款一条龙
1810	建议苹果系统支付只能用Apple ID支付，有人在苹果投诉直接全额返还！企业不合作直接下架app！这玩意依靠执法部门太难了，不如靠手机厂控制！说实话，如果小米能软件方面搞到最低价那我最少也要弄台小米！
1811	建议每一个应用都搞一个国家平台，类似于12306，老子用爆[脱单doge][脱单doge]
1812	建议加重罚款[tv_doge]
1814	建议根据用户数量进行罚款分级，大公司一次罚个几百万几千万，全网通报，看他们怕不怕
1815	建议各位闲的没事的时候可以在各大软件搜索栏里打一些自己之前不敢想的东西[崩坏3_路过]
1816	建议飞机票和火车票一样统一价
1819	建议罚款乘以中国人口基数。
1820	建议罚款按照企业收入额处罚，不然人家杀熟获利都是按亿算，你罚他50万有用吗？
1821	建议罚个50亿，我买东西不怕贵，要是贵不买就可以了，但是我要是买贵了，我就很恶心。[吐]
1823	建议发现一次处罚10w以上罚款，让骗子和那些公司去斗智斗勇。只有魔法才能打败魔法
1825	建议大家追央视一套的《觉醒年代》
1827	建议把罚款改成公司的年盈利金额的百分之七十[嗑瓜子]
1829	建议按照营业额比例罚款
1830	建议按营业额百分比罚款
1833	减肥男爵回复 @两个蓝biubiu :这话说到我心坎里去了，首先不知道合适的投诉通道，连怎么投诉普通人都是两眼一抓瞎！
1834	监管不力，法律不完善且不严。
1836	价值6個硬币的名字[抠鼻]想当年，哈罗电动爹每次换车都要拍照找客服，定位就是不进圈了一直反复横跳，后来哈罗变成广告app就用美团了，，，美团好歹在附近就能还车
1837	价格歧视的前提是价格透明以供用户选择差异化服务，在价格不透明情况下玩这套就是坑蒙拐骗，违背市场公开透明原则，严重可涉及市场欺诈及不当竞争。
1839	价格歧视本来是资本家为了多割韭菜的，还讲的成了商业策略[doge]
1840	价格歧视：给有钱人定价高点，怕他出的钱少，给没那么多钱的人价格稍微低一点点怕他不买，这样能赚到更多。
1844	假如交易平台对买卖双方多赚一块钱每人，一天至少几百万单交易量，多赚几百万[doge]
1846	加强监管，反垄断一定要落到实际
1847	加大处罚力度
1852	记得之前美团还是饿么了会员和非会员配送费不一样[无语]
1853	记得亚马逊以前就搞过 这些东西还真不太好控制
1855	几年前就这样了 特别是某程 你刚用手机查了几次航班价格然后再去网上查就不一样 再也没用过它
1857	几年前就发现过，当时还跟人家半开玩笑的说这事呢，人家说可能是因为你的手机要贵一点吧，当时没怎么放心里想着怎么可能，草，没想到是真的[辣眼睛]
1858	几年前，被淘宝天猫超市体验了大数据杀熟，还测试过几次。我安卓手机室友苹果手机，同一个商品价格不一样。
1860	即便讲了这么多，这些软件也不会改的
1861	基本所有可付款平台都存在杀熟现象
1862	鸡鸣犬吠五更天法律恰恰不适用于穷人
1864	机票这个我也遇到过，因为用我的手机搜太多次了，后面直接用朋友手机买。网络购物没有，因为我账号多[doge]其实某宝还真没有吧，我用新号和常用号看都一样，就是最近多了个首单免多少的，真狗。
1865	机票这个东西，千万不要反复看，不然你每次看机票价格，一次比一次贵，别问我怎么知道的[OK]
1866	机票我都是多平台比价包括官网，然后下单[OK]
1868	机票请上官方网站购买，避免中间商差价。酒店嘛…哎
1869	机票千万去官网买，比平台买多很多优惠和自选服务
1870	机票就是个非常典型的例子，老查老点，自己就把价格点上去了[笑哭]
1871	机票价格就算同手机刷新几次也会不一样啊，起码用快销品做证据吧
1872	机票，酒店这种都是货比三家至少，官网美团饿了么同程携程飞猪等等等等app，哪个最便宜就买哪个，反正你们都杀熟，都是竞争对手，那就看谁低价[嗑瓜子]
1873	伙计们，大家还想换苹果手机吗
1874	火箭少女101-王香秀资本:既然不让杀熟，那就全杀咯[doge]
1877	回昔其实，如果不是私人管控，而是国家管控这些信息，互联网不会出现大规模信息泄露的事，问题不在互联网，而在于利用互联网的人。
1885	画桥烟雨入秋风淘宝京东
1886	华子开团，马上上车[OK]
1888	互联网运营的本质就是用户歧视。他们把用户按一定标准分层，针对不同的层级用户设置运营活动。价格歧视就是常用的一种，店大欺客的现象是存在的。完善监管体系才能跟上并助力中国互联网的发展。
1890	互联网垄断资本家寡头
1893	互联网寡头们急需监管，不择手段捞钱了
1895	后面商家还可以根据同一出口ip，相邻位置改成统一价格
1899	哼，有利润呗，犯罪成本太低了，就算你罚他，能罚多少？交了罚金剩下的不也是大笔收入？.....我认为不知要罚罚金，还要罚几年内加税这种收入越高越肉痛的处罚....
1902	很正常啊，无非就是，朱门酒肉臭路有冻死骨，现在已经不只是大数据杀熟了，有些狠的直接黑吃黑，两头吃，比如某中介，比如某外卖平台，人家在你不知道的情况下，双头吃钱，别管钱多烂，吃到就是赚到，比如之前的某打车平台，某一次早上2点，三个人一起叫快车，三个价格，6的很，我就很好奇，既然都大数据了，为什么就不判断一下定位？同一定位的打车价格勉强一致不就不会有这么多的麻烦，或者是说，这点钱就舍不掉了？[2233娘_委屈][2233娘_委屈][2233娘_委屈]
1903	很正常，系统商店收费，平台就收你钱
1905	很久以前我和身边的人感慨大数据时代的可怕之处，这些大公司会把普通人玩弄于鼓掌之中，得到的回复通篇都是“杞人忧天”和“想的太多”。后来才发现人穷不可悲，可悲的是不知道自己为什么穷。
1906	很多人不都从应用商店下应用吗，苹果是遭什么罪了，就是错误的，别的企业就没错，为什么游戏充值也分成游戏公司却苹果不涨价，为什么爱奇艺那些要涨价，不就是想把成本扣在消费者头上再把锅扣在苹果头上，还为软件商洗地真tm无语，要是平台不把抽成扣在主播头上主播当然可以让你直接打赏，所有从软件商城下的都有抽成，甚至很多视频app不上架安卓商城就是为了避免抽成，安卓机型太多所以软件商不得不自己承担抽成，现在反倒变成因为苹果抽成所以涨价，什么言论，但凡去网上查一查，很多手机应用商城官网都有对app抽成有详细介绍，华为的我就看过，游戏充值50%-70%，app充值30%这不是抽成？为app洗地真无语??，你不应该反对app抽成让消费者买单，同时要求抽成减少吗，什么心理啊
1907	嘿嘿，当你同时装了美团和饿了么，两个平台轮着买会员你就会发现...[妙啊][妙啊][妙啊]
1908	黑心的资本!
1909	黑心的资本
1912	和欧美面临一样的问题，实体经济和虚拟经济的竞争，虚拟经济通过加速实体经济的运转来获得利益，其实就是二道贩子，本身不产生附加值，只是通过运转，大数据，来获得不透明的利润差，监管很难，说句严重的话，互联网公司应和水电气一样纳入国家管控，按照介入民生的程度来确定企业的性质。
1913	何止美团，饿了么一样
1917	呵呵，曝光有鸟用？违法成本这么低，而且这种事情是第一次曝光？不知道多少年了，再次一句呵呵。
1918	好兄弟们，我做得对吗@腾讯@阿里巴巴@同程艺龙@京东@滴滴@美团
1930	好家伙，原来还真有大数据杀熟这一说，我一直以为是段子。。。
1931	好家伙，我上个月回国打了几次滴滴后，再也叫不到车是什么个意思[辣眼睛]
1932	好家伙，天天打滴滴上学的我太惨了[笑哭]
1934	好多软件都是这样的，使劲的坑消费者[呆]
1936	好处理，发现一起责令相关企业限期整改，整改期间app活着app相关功能禁止使用，整改过后再发现类似情况加长整改期限。对实体店的手段搬去治网络公司一治一个准
1938	寒假回家的时候就发现自己被杀熟了，同一个酒店，同样的入住时间和离开时间，同样的房间类型，同一个新申请的新的高德地图的账号，在绑定了订过了这个酒店的淘宝账号之后，价格马上就比没绑定前贵了三十多块钱，而和原淘宝账号解绑了之后，价格又落回去了[嫌弃]而且，高德地图订酒店还只能用淘宝账号支付
1940	害。早知道了，我算是很早就了解这东西的人了。拿我的手机订宾馆，总感觉不对劲，最后拿舍友的订，便宜二十块钱[吃瓜]。然后我就发现数学真是个好东西。
1941	害，他立场不对，用户每个人给软件两块，加上软件本身的抽成。感觉只要有客流就能赚钱了。运营心情好今天给你减免2块钱，你还会感恩戴德的。美团外卖和饿了么津贴就这回事
1943	还有整治一下国内游戏的648~标注的比率和实际测算严重不符
1944	还有游戏抽奖 没有大数据杀熟我把头拧下来[辣眼睛]
1945	还有一些是记录用户行为信息然后进行后续操作的
1946	还有拼多多！月卡开通，新用户便宜。老用户开通都不一样。有的12一个月，有的20一个月，价格都不样，越用越贵，杀熟
1947	还有拼多多
1950	还有饿了么，贼无语，我经常点还有会员，送的券都是35-4的，我同事几乎不点外卖，送的是20-12的，第一次也就算了，前两天她又跟我说饿了么给她优惠券了，气得我回去就把饿了么给卸了，恶心
1952	还有滴滴！滴滴！！滴滴！！！
1953	还有爱奇艺登入账号看视频有广告，而不登后看视频自动跳过广告[doge]
1955	还用苹果手机吗？用啊，为什么不用，反正我安卓苹果个一台
1958	还是新华社敢说，新华社yyds
1962	还是监管不够严厉
1963	还是狠不下心来罚款，为什么呢
1964	还是顾着面子，没说“大部分”和“全部”互联网平台。
1968	还是打击力度不够，如果政府以悬赏的方式让群众自行收集证据监督各大企业，用不了一年，就会有彻底的改善
1969	还是处罚力度低了，罚个几万十几万，人家杀熟一两天就赚回来了，应该直接让他肉疼，让他处罚的金额远远大于非法所得
1970	还是不行啊，要是新华社的粉丝有个六七千万，那就爽了
1972	还好我是小米手机[doge]
1974	还好美团飞猪去哪儿都卸载了
1975	还好看了看我的共享单车卡还是扣了1.5元[doge]
1976	还好火车票有国企的订票系统
1977	还得是人民的新华社[热词系列_吹爆]
1980	还不如罚款将公司强行收为国有，老总全部踢了，员工强制在岗干一辈子，没有人才你开个什么公司，也就是被所谓的不可以与民争利束缚了，不然那些公司不弄死就怪了
1985	哈哈哈，我再也不叫外卖了，我做饭带便当可以嘛[笑哭]主要是被人宰的感觉真的难受[笑哭]
1986	哈哈，国家想管直接要求算法备案，事后发现存在杀熟行为直接取消经营资格不就得了呗。不完善监管手段、不提高惩罚力度怎么可能打击到这些互联网寡头[doge]
1988	果然资本就是邪恶的！！
1989	果然论创新还是资本家剥削手法第一[doge]
1991	国外罚款都是几亿甚至几十亿美元的罚，这我觉得中国还是很有必要学习和借鉴的吧，当警告示罚款多了，他就会麻木甚至轻蔑，一定要让他赔的不敢再这样
1992	国内啥时候能规范保护好互联网上个人隐私后，应该稍微会好点。
1993	国内对资本的惩罚力度太轻了，几十万是在按摩？
1994	国内的资本蠢蠢欲动。
1996	国家或者人大推行一个app，类似这种举报，当然人人都实名制才能进行举报，定期进行各种视频的人脸人动作验证维持账号安全。同时防止刷举报什么的。然后积累一定量可以进行调查，而且一些曝光类的新闻也很喜欢去提前曝光调查获取一定量的流量。何乐不为
1997	国家不能出个机票火车票的好用的APP嘛，12306总是进不去，验证码也太阴间了[笑哭][笑哭]
2002	光抱怨没用，用行动说话，觉得不合理就坚决不用不得了
2016	怪不得那么多app要求读取我们的设备信息
2017	怪不得美团有时候就是价格忽高忽低[doge][doge]
2018	怪不得 我和我同事用同样的外卖app点同样一家店的同样一种餐，都不用券，我的比他的贵，就因为我的往年点单平均单价比他高，所以就这样[辣眼睛]
2021	孤久溺霾_其实没有必要单独骂腾讯，因为除了腾讯其他家软件都一样杀熟，飞猪饿了么淘宝都会[OK]要骂一起骂才有用，单独骂腾讯那其他家不改有用？
2024	购物软件 打车软件 订酒店软件 外卖软件
2025	购物车里的衣服莫名其妙的库存紧张，都快紧张2个月了[doge]
2026	狗日的携程
2027	狗东，同一款商品，10年老号比新开的小号还贵就离谱[吐]
2031	更离谱的是饿了么用了优惠券反而更贵，这是把我当傻子吗[辣眼睛]
2032	跟手机没关系，跟账户有关系！
2034	跟火车票一样，搞个官方的售票平台[脱单doge]
2035	跟大数据保持距离，尽量现金线下交易，气死大数据[doge]
2036	根据不同品牌手机定价，这玩意儿不是“价格歧视”吗？哪来的大数据
2037	根本没人管 只要你向那些平台官方反映 他们有的可能连问都不问 要么就是一套特别官方的回复 说你手机定位啊缓存有什么的有问题 希望平台没事??
2038	给新华社大哥疯狂打call[脱单doge]
2043	各类新兴技术的出现，带来了各种安全隐患。普通人运用这些技术犯罪很容易被制裁，但资本不会，因为资本懂法[doge]
2044	个人愚见，对企业的罚款可以按照百分比数额来惩罚，罚固定数额未必有效
2045	个人出行买机票和火车票都是在航司官网、12306和第三方进行比价后才进行购买，当然公费出差个人订机票时就没关系了，反正又不是自己掏钱[doge]
2047	搞得我现在都不敢用app了。就用火车票就用官方的，飞机票电话订票，住店直接打酒店前台预定。哪怕麻烦一点我也不想被平台赚钱
2048	搞不好随着科技进步，未来用大数据真有机会实现一级价格歧视
2050	高铁火车票在12306铁路官网上买 买衣服都是直接线下门店 对比线上旗舰店
2051	高能影视o我收藏在购物车里的物品，过了一久没付款，它自动为新顾客减5，这算吗？
2054	刚在去哪儿订了票，一周前查票还比现在便宜五十，因为要规划路线所以这几天都在查票，看到涨价后还真想到过，但觉得应该不敢这样做吧，接着就收到这条推送，哎
2055	刚在京东上看了某商品，进b站就看见一模一样的广告。[疑惑]
2056	刚好美团和饿了么都有B站账号，建议出来对线[捂眼]
2057	刚刚对比了一下高德和滴滴，同样路线打车，滴滴10块，高德10块优惠8块，我………………
2058	刚刚被滴滴大数据杀熟，同样的行程相差近50元，求助，如何维权
2060	刚才，就在刚才。跟我朋友准备叫滴滴，起点终点一样。我的17，我朋友13[OK]
2061	刚被新华社快看骗了硬币，又要被你骗硬币[呆]
2066	感觉这视频都是大数据推给我的[辣眼睛]
2069	感觉美团越来越贵了…看来不一定是商家涨价了
2070	感觉机票很明显，如果之前买过或查询过同样航程，机票价格会比没有查过的高一些
2071	感觉好奇怪啊，为什么国家不罚多一点，一次罚个几千万几亿，政府这钱不就有了吗，哪还需要卖地赚钱啊
2079	改变一下，罚款15亿起步！
2080	该整顿互联网“科技”公司了
2081	该隐47到酒店找他们理论，然后给我升级了一下房型。我他妈的
2083	服务人民，约束资本
2090	飞机票真的杀熟非常明显，我经历过好几次了，第一次看500多元，三分钟后变成了900多块。
2091	飞机票几天前看是400，几天后看变成1000了[疑惑]，我TM还怎么回家
2094	犯罪成本太低了，建议大数据杀熟查出了就强制下架一个月整顿，累计3次直接永久下架
2096	反正也没人管，最主要是没法律依据，只能选择不用
2099	法治漏洞吗？？？凭什么让他们那么好赚钱！老百姓的钱是一天一天受苦受累的血汗钱啊！这些企业就是抢劫犯但不用受到法律惩罚。他们就相当于这个世界的bug，掌握了技术可以为所欲为！
2113	罚钱很难决定罚多少，罚少了？这能是人家几秒钟就赚回来的。罚多了？还是消费者承担最后的成本。暂停经营？目前市面上大部分服务提供商头部就两三家，暂停其中一家，就是给其他家割韭菜的机会。加税？参考多罚。算了，以后出事，抓最终控制人好了。
2117	罚款终究还是从用户头上来 罚款越多宰客越狠 而且会愈发猖狂的收集用户信息
2125	罚款太低了！投诉没人管，坑人
2132	罚款力度不够，应该以十亿单位罚。建议参考国外罚款标准，罚个几百万，几十万的杀个熟秒秒钟赚回来有什么用。作为资本当然是宁愿交罚款也要杀熟，我边交罚款，边赚钱而且赚的更多。
2133	罚款额度最好能大幅提高，然后增加同行或者个人举报途径并给予罚款总额一定比例的奖金作为维护公共利益的特殊奖励
2159	罚50w，再罚之前人家杀熟能以百万为单位赚，罚款一点用都没有，不过是少赚一点[无语]
2162	发现一例，平台暂停半年，半年内变化莫测，竞争对手就会起来，用半年给其他平台营造机会，创造良性竞争。压制垄断。
2164	发现杀熟，然后呢？罚款50以示惩戒？
2165	发现了一定要举报[2233娘_怒]
2168	发评论就想把新华社顶上去 谁都tmd别装死
2169	发评论就想把新华社顶上去 都tmd别装死啊
2170	发评论就想把新华社顶上去 都tmd别装死@
2174	而且喵个咪的为啥北京飞西南地区就贵州贵阳的机票最贵，次次上千，周边地区广州广西，重庆四川湖南的机票都比较便宜[辣眼睛]我每次基本都要花比室友高两三倍的价格回家。火车又太花时间绿皮车40小时高铁都要10小时左右
2180	饿了么和美团轮着用，我们没办法，就只能暂时这样了
2182	饿了么，美团，都杀熟啊[吃瓜]
2185	恶心，真的恶心，我们不差那几块几十块，但是瞒着我们做这种恶心人的事，我克去你资本家的族谱了
2186	恶心，除了恶心还是恶心，我用美团买外卖红包，然后那两天卡里没钱就取消了好几次，最后见我取消了几次直接给了我一个特别大优惠的红包券[微笑][微笑]
2187	多治理下吧，加大罚款力度
2188	多搜几次就涨价了，点几次运费险，运费险就会涨价办了6块多，点了两次之后显示9块多，还有美团订宾馆，我用美团少显示价格198，一个朋友用的多同样的链接点显示209。[tv_白眼]
2189	多罚款就好了
2190	多查几次价格真的会变高，之前买机票第二天再看又涨了[辣眼睛]
2193	对于杀熟的软件直接下架肯定管用
2194	对于后面说举证难是因为不知道算法，话说为什么需要算法来举证，像视频里这样拿不同的手机对比一下不能算证据吗？
2195	对于弹幕中好多说苹果抽成的事情我想说一下：苹果抽成不包括外卖、机票车票等。苹果抽成包括以下几个方面：如果购买行为作用于APP，比如需要购买才能使用的APP(付费下载)，游戏钻石，APP会员等虚拟物品，需要走内购，苹果抽成30%。如果是实体商品，比如外卖，车票，路费，淘宝商品等，苹果不抽成，可以直接微信支付宝银行卡付款。如果是打赏，如b站充电、快手直播打赏等，如果开发者不抽成，则苹果不抽成。如果开发者抽成，则苹果也抽成。综上所述，大数据在车票机票外卖等方面的杀熟与抽成无关！就是互联网企业的黑心！
2197	对我来说最直观的感受就是，以前点外卖大部分都是15块左右，现在基本都是20，以前点外卖要比店里便宜
2198	对苹果手机用户很不友好啊，可能机型越贵宰的越多，我一加五还能再抗几年[脱单doge]
2201	毒APP放进收藏一个多小时没付钱涨100多，得不买了
2202	抖音把用户手机当做肉鸡，后台以用户账号发布评论，被我刷抖音的时候发现了三次，我没有打开评论输入框，屏幕却提示“评论成功”，然后我赶紧打开评论，果然有“我”留下的一条评论，望严查
2204	都没说到点子上，还是蛮充分竞争的市场环境，还搁那吹市场呢，就是缺监管缺罚
2205	都快成月经新闻了，问题是有人整治吗？
2206	懂了，这就买个1000的手机打车
2209	懂了，买2部手机
2210	懂了，今天用我爸手机点外卖，明天用我姐手机点外卖
2214	董大雪子可以尝试先在app上看有哪些航班的机票，在下单前去官网确认比对，比如春秋航空的机票就去春秋航空的官网
2217	订酒店那个，去年我同事吐槽用美团订某四星酒店要五百，我小姨笑说本地人就知道酒店一个房都是160。
2224	顶格罚款才50w ＝ 下次还敢
2225	顶格罚款50万，对他们有威慑吗？
2226	顶格处罚五十万是吧??
2232	点赞新华社就对了
2234	点外卖是因为比去店里吃便宜方便，什么时候涨的比店里贵，那就不点外卖了，改去店里吃。[doge]
2236	点名批评美团和饿了么，我自己号被大数据制裁了，不允许买加量包，打客服，客服装傻，然后我多开了5个号，每个都是从pdd买的年费，这你逼我的[doge]
2237	点名：腾讯，阿里巴巴，同程艺龙，JD，滴滴，美团，
2238	点名：马化腾，马云
2239	点名，移动联通电信各种杀熟骚扰电话几十年了不见新华社点名一下？
2240	点到到付款界面再说吧。也不是同一个账号
2241	第一点，现在的人太容易被带节奏了，稍微一带就跟着跑。（这里，各个平台都差不多，只是受众多少的问题）。第二，不管你信不信，一个人只要被查，不管他有没有问题，那么他都有问题，毕竟造谣一张嘴，辟谣跑断腿？如果哪里不太对，请赐教，俺要和你比划比划
2243	第一次买机票，不确定买不买，第一次看800，第二次看805最后确定要买了820买下来的有几年了吧
2244	第一次进入飞猪，上海到广西有400的，出去一下进来加乘机人，我的400块呢？怎么最少变490了？再刷刷？不出来了，那就买490的吧。怎么还要买一张啊？那我就再进去买吧，怎么回事？400的又出来了？买完后，诶呀我赚了[辣眼睛]
2245	滴滴早删了，我老早就发现这个情况了，恶心吧啦的！
2246	滴滴优惠打折卷，购买你就知道有多坑了。买过一个6块钱的6次八折卷。然后打车，第一次确实打了八折。少了六块钱。然后后面也打折，但打完折的价格比我另外一个手机没打折的价格还高。
2247	滴滴也是这样，苹果两个人顺风车300多路费，安卓只要240左右[妙啊]开始以为卡了，后面关了重开还是一样
2249	滴滴是真的够了，本人几个月前之前达到过白金。然后今天我打车一看价格72块钱，我就让我同伴打车，他的价格是42块钱。[辣眼睛][辣眼睛][辣眼睛]
2250	滴滴杀熟也厉害，同一段路程，亲戚（滴滴老用户）用滴滴打车14元，直接在路上打出租车8元，新注册的滴滴号打车也是8元。
2251	滴滴杀熟是绝对的。我曾经做过实验，四个同学打车显示的价格完全不一样
2252	滴滴每打开一次价格都不一样，短时间多来几次就会涨上去
2253	滴滴就两个手机两个价格
2254	滴滴经常，如果你做常用路线的车，你直接点击常用路线和你搜索那个地点再确定，俩者总有几块钱到10块钱的差异，没有优惠的情况下
2255	滴滴打车越来越贵
2256	滴滴打车也是杀熟
2257	滴滴打车出来对线！同样的距离同样的起止点！第一周8块，第二周9块！第三周10块！第四周以后稳定11块！
2258	滴滴打车。美团 饿了吗都有大数据杀熟[辣眼睛]用过都知道
2259	滴滴打车，安卓机，以前在北京打车被加钱了自己也不觉得，还认为有券又优惠，反正北京路况也堵，所以不好判断招手打车和滴滴价格的对比。现在回老家，我们这打车去医院，6块钱。用滴滴第一天还来回分别6块多，同样的时间回家，结果第二天告诉我什么晚高峰加价。一口价回去竟然要11块钱！！我们这个小城市公交车晚上6点以后就停运了，哪有什么晚高峰啊[喜极而泣]，还加钱。还说周围司机繁忙，是否又加钱远距离调度。拒绝后显示还是11，站马路等了一会就有正规出租车了，回家还是6块钱。小城市，不是逢年过节哪那么容易堵车啊。
2260	滴滴打车
2267	低消费、不买房、不结婚、不生子，是我对抗这个资本社会的方式。[OK]
2268	低情商：软件大数据杀熟.高情商：软件大数据识别穷人后给予价格优惠，背后原因令人暖心[doge]
2269	低情商：大数据杀熟
2270	低情商:大数据杀熟
2271	等一下！价格歧视可是双赢局面，你们怎么就开始冲了，校园卡，部分打折商品等等太多了，面对不同人群给出不同价格，甚至是有些早晚价格不同的商品，本质上也是价格歧视，这你们怎么就……
2272	等雪的雪上次京东看了伊莱特电饭煲，乖乖，所有软件的广告里都有电饭煲，uc，陌陌，QQ，拼多多，淘宝，唯品会，把我恶心到了
2273	的确是这样的，我和我妈，淘宝搜桌子搜出同款，但是价格差了几百。。。。。
2274	得完善互联网法律条文
2278	到底应该怎么查？首先两到三部手机刷机，然后连接不同的WIFI并且关闭蓝牙GPS，然后就刷新吧
2279	到底谁才是资本家啊?我们国家资本家可厉害了呢 国外资本家算是什么垃圾啊[歪嘴]
2280	当利润达到10%的时候，他们将蠢蠢欲动；当利润达到50%的时候，他们将铤而走险；当利润达到100%的时候，他们敢于践踏人间的一切法律；当利润达到300%的时候，他们敢于冒绞刑的危险
2283	弹幕有点常识行不行？买机票苹果抽什么成呢？张口就来[疑惑][疑惑]
2284	弹幕一群云用户。这些实体等付款apple根本不抽成，这个就是价格贵不懂吗？这还用洗的？照这么说我银行卡转账抽3成？希望天天多抽这些??用户的钱，反正他们不在意自己权利，还帮洗地[疑惑]
2285	弹幕说罚的少了是真的没毛病，现在就是谁告给谁赔就完事儿了，就跟直接律师告爱奇艺超前点播一样，平台违法成本顶天了万把块，要直接按用户注册数罚款，有几千万的注册人数按人数一人10块都能罚死他们，看哪个平台还敢作妖。。。
2292	单就机票而言，解决大数据杀熟最好的办法就是由民航局主导，整合国内所有航司航班数据，开发一个跟铁路12306类似的网上购票平台[吃瓜][吃瓜]
2293	逮住一个罚到资本觉得痛痛痛痛痛才行，不然公司高层谁care啊，还觉得是行规
2295	逮住一次罚款当年利润的50%，国库充足了不是美滋滋嘛
2296	大型企业即使罚款一个亿都无足轻重，光看原神一个活动流水都能上几亿，再对比这些大型平台企业，用户是原神一款二次元游戏的好几十倍，就可以估算下了。而群众举证有个前提是，群众会愿意为这2元钱去做出这么一个举证，那样耗费的精力就没有几个人愿意去做了
2298	大数据应届毕业生说，学到头发都掉光了，毕业还面临失业，读个毛线
2299	大数据是你们这样玩的？[疑惑]
2300	大数据识别穷人随机立减2元。[翻白眼]
2301	大数据时代最恐怖的就是大数据
2302	大数据时代限制了我们的视野，让人们只能片面了解东西，让很多圈子相隔甚远，让人无法被动吸收新的讯息，这一点很不好。
2303	大数据谁在管理？
2304	大数据杀熟这个问题已经有几年了吧，什么时候能解决呢？拜托提升监管力度和惩罚力度。
2305	大数据杀熟涉嫌价格歧视
2306	大数据杀熟其他的我不清楚。但是第三方平台 携程。同程。美团 这种价格一般拿的是供应商的数据。只会有服务费和一些产品赚钱而已。 价格都不知道哪里来的 还扯淡第三方平台杀熟
2307	大数据杀熟很正常啊，我上次用闪送用微信20，美团才12。这就是吃用户的依赖度，做产品就是靠这个赚钱的。
2308	大数据杀熟不是几年前就在说了吗？这还用得着测试？大部分有网络消费经验的都知道吧
2309	大数据杀熟×
2310	大数据杀熟，我看成了新华社记者杀疯了[喜极而泣][喜极而泣][doge]
2311	大数据杀熟，给你做客户肖像，在你没商量
2312	大数据杀熟，大数据时代，时代杀熟，哦吼。
2313	大数据杀熟
2314	大数据让资本更轻松割韭菜
2315	大数据就是通过收集隐私为企业服务，除了常规改善经营，不杀熟还有什么用，用肚皮也想的到[doge]
2316	大数据就拿来干这个
2317	大数据好啊（
2318	大数据好啊
2319	大数据还有隐私权
2320	大数据还杀苹果呢[doge]之前打车，同事苹果手机60，我安卓手机40[嗑瓜子]
2321	大数据分析不了我[doge]
2322	大数据懂得都懂，新华社怎么样还不是要整你就整你，反正你也抓不到[doge]
2323	大数据点弊端凸现
2324	大数据的作用就是收割老百姓的
2325	大数据的用处终究还是卡成本提价格不是吗，不能相信人性是我们生存的法则。
2326	大数据的区别对待比我们想象的更加恐怖，甚至你看看视频，评论，也会给你选择性的呈现你喜欢看的
2327	大数据的目的就是为资本服务，别逼逼叨叨什么各种功能，每一个结果都是导向资本
2328	大数据不应当给资本家用来坑杀用户，而是利用大数给企业提升产品和服务质量等，转而服务好用户，进而持续推动社会的进步与发展。
2329	大数据不杀熟还是大数据？
2330	大数据不就是给商家用的吗？（狗头保命）
2331	大数据不就靠这个
2332	大数据必须由国家机关掌控 不能给资本家 不然就是吸血利器 还有手机隐私什么的
2333	大数据？只不过是刷后台收集数据罢了
2335	大平台：罚不就是罚个五十来万吗？
2336	大家买机票和高铁票都在哪买啊
2337	大家买飞机票真的就去航空公司官方app买是相对最划算的，每个航空的会员日还都有便宜的会员价，如果经常差旅可以攒积分冲常旅客会员，不定期可以积分或者低价升舱[OK]
2340	大家都懂 可为什么没有“相关部门”出来执法呢？
2341	大吉岭同学提不起劲回复 @Vone某条蠢鱼 :机票去航空公司自己的网站APP去买。比如南航淡季经常会有4折机票。美团上面还是原价[OK]
2342	大概半年前发现的。我跟朋友订电竞酒店同样都是安卓系统，用同一个软件查找，就因为他的手机比我型号旧一点他那边总比我便宜30到50块钱。真的离谱
2343	大而不能倒了，政府也没办法
2344	大胆子，新华社[支持][支持]
2346	大Vacuole回复 @Meek_Mill :[OK]以后点外卖就和朋友约着轮流买哈哈哈哈
2348	打开电脑淘宝不登录什么都不能看。。。。[辣眼睛][辣眼睛][辣眼睛][辣眼睛]
2349	打车钱也是贵的手机比其他便宜手机贵！这些企业真是越来越厚颜无耻了
2350	打车app会被收苹果税吗？
2351	打不死还不如别查，查完罚款，过后企业继续杀我们，补回来。罚来罚去，闹半天还是用户的钱
2352	从来不打车的怎么说[doge]
2359	创造了一个更充分竞争的市场环境，然后大家一起来杀熟，就说市面上哪款APP没杀熟吧？
2361	川普表弟约翰逊飞机这种最好是按照一个星期固定价格 上传到国家专门网站 让人买票的时候能查询 举报 如果一次定价高罚款10万 大型物品都适用
2366	除非发现一次罚50万[尴尬]然后专门组织一批人刷这个数据，然后一次对应一次罚款，可能会怂一下
2367	出去旅游某APP查宾馆价格 在家看是200 到地点就变320了[笑哭]
2368	出来标准的书面发个道个歉，就没了，不用负责，就算罚款了，对于他赚的钱也是很小了
2372	充分竞争没可能带来公平的，非要等搞清楚他内部算法才能证明杀熟就是在瞎扯淡。汇总不同消费者消费数据达到一定数量，其实就可以证明杀熟事实成立。
2374	充分竞争——＞相互举报
2376	充648的玩家表示，很早就知道苹果有抽成，而且大家都默认了。这不应该算杀熟吧，同平台老用户和新用户对比才算。
2383	惩罚也没啥力度啊，这样子做的利润动辄百万千万起步，就算被罚也就几万十几万的罚款
2385	惩罚式处罚才是王道
2390	陈平の不等式回复 @肉松到底松不松 :删了什么？
2391	尘星行主要是各种会员、购买付费APP、充值各种游戏内点券，还有各种打赏类消费。
2392	超正常了回复 @呐喊平平 :特斯拉刹车坏了 开车去菜市场就没回来[doge]
2395	查到了又怎么样呢，处罚的不痛不痒，监管也缺乏
2399	草 我刚发的评论就被删了？
2401	踩zai浪花上我华为手机，前几年火车站滴滴到家往返二十块，今年换了个vivo，往返17块[辣眼睛]
2405	不止苹果手机，高端安卓也是一样吧，会根据你手机价格来杀熟，用价格贵的手机就默认你是个有钱人，不知道滴滴等其他日常用软件是不是也根据手机型号定价格[白色情人节_拳头硬了]
2408	不知道曝光了有没有用，希望早点解决！
2410	不用罚款，让他们无限制生长就好。
2411	不用创造什么竞争市场环境，通报无效直接制裁就完了，无限期或永久下架app，查封资质冻结资产，组合拳一套下来杀鸡儆猴，这群资本家就清醒了，知道谁是爸爸了
2412	不要在一个平台上逛和买，在多个平台上货比三家。[笑哭][笑哭]
2414	不要买苹果手机，不要买。
2415	不要被误导了，是因为苹果手机贵，所以应用定位你是高消费人群，然后给你定价加高
2418	不痛不痒的处罚改什么改
2419	不同的手机用户在使用同一个网络观看过的视频或搜索过的问题 又或者在某app搜索过某种商品，然后其他同时在使用过这个网络的用户，都会收到类似的搜索问题和商品广告…这算不算杀熟？我感觉这个真是太k b了，毫无隐私可言
2421	不太明白为什么这么多人买机票不去官网买呢？我觉得官网比携程之类的好用多了啊！
2422	不是这不是说了等于没说吗？结果呢？国家不处罚吗？
2424	不是消费者很难举证平台某种做法，是消费者几乎没法举证平台任何做法[无语]
2425	不是软件更智能[doge]只是我们被看透了
2426	不是苹果抽成，像游戏，会员这种付给app的钱才是苹果抽30%。而且安卓的平台也会抽成。难道你点个100块外卖苹果还能收30块吗，不存在的，就是大数据杀熟。怎样让每个客户付出尽可能多的钱，就是资本家最关心的话题之一。
2428	不是 苹果手机贵两块钱和抽成有啥关系啊？
2433	不怕罚款，怕下架整改
2434	不能随便罚罚款。一定要用刀。而且这刀捅进去要见血。
2438	不就是三级价格歧视[doge]
2440	不仅对消费者，比如外卖平台对骑手，我朋友跑外面，如果经常接很便宜的单，系统就觉得你接受便宜的，就经常给你显示越来越便宜的单子，甚至3元一单的
2441	不会还有人不知道价格不一样吧。我都是多个平台看的。携程飞猪去哪儿三家挑。动车就12306了。
2443	不光这个，我和朋友同时用滴滴叫车同一段路，她就比我贵几块钱，因为我手机是果X，她是XR[无语]
2444	不光手机型号之间杀熟，还按机主年龄和经济收入杀熟。一次打车相同起点终点同一时间，我妈妈的小米手机比我的苹果贵了将近10块
2445	不光是杀熟，外卖平台，领了红包和没领红包，配送费是有区别的。一句话就是你貌似省钱，平台永远不亏
2448	不懂得不要乱说好吧，苹果只抽成从苹果商店购买的商品，你这个钱都不走苹果商店， 他拿啥抽成，就是被杀熟了
2449	不得是什么啊？处罚么？不处罚…那你这个不得和放屁有什么区别？
2450	补充一个饿了么玩法。。。比如我点外卖，点进支付页面了，最终价格是30，我出去买个抵5元的优惠券，回来就发现运费涨了两块。之前还有选了5元优惠券后，发现减少金额不到5元，取消优惠券后发现比最初涨价了的情况
2454	别问，问就是定位不准，什么机票？鹅，可能是手机离飞机距离问题，去哪里领钱[doge]
2455	别说杀熟了 去年去贵阳看房 说人脸识别最热闹的时候 售楼处直接就说 我这有 再来就不是这个价格了[doge]
2456	别说苹果税了，俩个苹果机对比时没看到么，下午那班机差了2块
2459	别罚款了拆了
2460	别的不说，就说最常见的美团外卖会员：还在会员期以内，续费会员五块到十块不等。等到会员过期几天后再去买会员，立刻降到三块多。如果是很久没有用美团，开会员甚至可以便宜到几毛钱一个月。
2462	标着178一个大床房，下单秒变198，我返回上一页，再下单，这次是178了，真魔幻啊，美团
2464	毕竟算法的规则是你们说了算，所以就有了逍遥法外的机会！是吧，@腾讯 @阿里巴巴 @同程旅行 @京东 @滴滴 @美团！
2468	必须罚款罚到它不能承受
2470	比如淘宝。。[笑哭][喜极而泣]
2471	比如某鹅讯，顶着被罚的风险赚了几个亿，然后被发现了，来个50万的罚款，再保证下次不会了。下次在换另个项目再赚几个亿[妙啊]
2472	本质是价格歧视，剥夺消费者剩余
2475	被平台杀熟也逃不掉啊
2476	被美团杀熟
2477	被点名涉及该领域的APP哪个官方号敢来说明解释一下
2487	半个苹果呀相关部门需要大数据监测，参考棱镜门[doge]
2488	百分比罚款
2490	白夜莜沫我用美团，4元开了个会员，给了6张卷，第一次去，卷不能换成7元专属卷，第二次去，可以换了，第一次没买是因为我看见可以换成专属卷，所以退出重进一下发现不可以换了
2491	白嫖到手软脚软忘记还有一个，@拼多多 .你也是这样的德行，别在笑别人。
2492	白嫖到手软脚软如果我的账号被封了，就是你们资本在搞鬼[嗑瓜子]
2496	把大数据杀熟的软件公布一下，我不用就杀不到我身上
2500	按千万为单位的罚款
2501	按差异百分比罚款，能大数据识别类型，就有对应加价范围比例。
2505	爱萌二的零貳b站只有会员购和会员，我试过，价格一样，依旧那么贵
2508	艾尔迪亚人需要隐私吗？
2513	哎…我只想买一双10块钱的家居凉拖鞋，结果一搜出来我滑了三页全是50-100块的拖鞋…。我就想在评论区问问大家在某宝搜拖鞋真的都是这个区间的价格吗？又觉得是不是通货膨胀了以前搜都是十几二十
2515	啊这不会真有人买航班还从飞猪上买吧 没有积分你就算买再多也没有航司金银卡[打call]
2517	阿里系是最没有底线的，飞猪上价格经常会比其他APP贵，我领导每次用企业支付只能在飞猪买，酒店一晚比我贵几十块，很离谱。加上其他合作时接触阿里人，现在对阿里印象非常差。。。
2523	WakoWapi回复 @鸡鸣犬吠五更天 :他的意思是法律只管得了穷人吧
2524	up，平台官方没公关联系你私了么？
2531	tinmo2016几年前旅游，提前上网看酒店，看了几次，然后价格一次比一次高
2540	saw-sweet回复 @Homoschlepien :他是意思是，单用一个app会杀熟，劵会少价格涨，换着用可以减缓这种杀熟。我平时也是这么干的
2552	Meek_Mill回复 @大Vacuole :我蘋果的， 同一個手機， 同一個外賣APP， 以前大多數店要配送費， 後來幾個月不用那個APP， 現在回來看要麼沒配送費(免費)， 要麼比以前便宜多了.[囧][囧]
2554	Mather愿天下苹果系统机票是不抽的，不然30%哪怕只是10%抽成费用还不如买个安卓低端机来专门订票。
2555	Lau蠢鱼外卖，酒店，机票[微笑]
2556	KINO_1790苹果税针对的是应用内购，也就是软件本身的订阅内容，7成归开发者，3成归苹果。但是商品交易不属于内购，且不走苹果支付的途径苹果也是收不到税的，你看京东上那些价格明确的商品苹果和安卓买价格都一样，支付宝花个十块钱苹果也不可能抽走三块钱。
2558	KINO_1790不走苹果支付的途径苹果是收不到税的，你看京东上那些价格明确的商品苹果和安卓买价格都一样
2560	JD 我都不怕， 我有价格比价助手
2561	Jackson_XIE回复 @小跳蛙今天午睡了么 :互联网就是有你这种键盘侠才不干净，我作为一个iOS开发者才实事求是，苹果抽成只抽程序内购，你这种机票是内购嘛？走的就是第三方
2564	iOS系统贵可能是iOS抽成太高了，但的确很多软件对于老用户有明显的涨价，我就想知道我美团续费会员咋就八折了？
2565	iOS和安卓应该升级系统权限，拒绝app获取手机型号
2568	i860回复 @奕白黑 :这不是重点，你完全可以事先和他商量，我借用你的工具自己修手机，修坏后果自负，这样通常只要象征性掏几块钱工具租金。如果有实力me too，不求人自己解决问题，成本最低。做开发都知道，完备的防御性设计成本比单纯现象正确高一到两个数量级，配套比较完备的测试又比设计成本高几个数量级，搭建标准化测试平台耗费巨大，但一旦成功就能源源不断获得巨额收益
2571	Homoschlepien不同app的价格不同不属于杀熟。得是同一个app同一家酒店但因为用户的手机型号、用户的活跃程度，甚至用户的消费习惯、喜好，而区别定价的行为才算“大数据杀熟”
2572	hhhSherry何止 你用浏览器搜索或用淘宝搜索商品 之后你就会在微信 淘宝 浏览器等各种地方看到相关产品推送
2573	HanGo说买机票苹果抽成就特么离谱，是不是我支付宝转账一千苹果抽三百啊[doge]
2575	GanlvTech回复 @tobell :随机立减意思是原价是统一的，实付不统一。两种说法还是有区别的。最简单的方法就是和航空公司的官网价格进行比较。如果比官网价格贵，那就有问题。
2578	e了么外卖：开通会员本月只要2.9员
2579	emmm机票的话价格变动很大吧
2582	DECENTdamnation罚款不应该固定数目，应该固定百分比
2590	B站大会员价格不同人，折扣不一样。我举报
2591	Blooming_Day淘宝你用不用那些功能都杀熟啊
2592	Blooming_Day你不会以为你买的便宜了吧，只是正常价格而已
2597	AokIvan回复 @小跳蛙今天午睡了么 :我并不关心你用什么，但这个视频讲的是大数据杀熟，跟苹果抽成有什么关系？你发布这种评论不是引战是什么呢？
2600	Abyss_Nova视频看了没？同平台对比，一个1118元，一个1120元。
2601	600的机票给我涨到1200。携程。去哪儿 微信。支付宝。这四个吃相太恶心了
2604	50万的巨额天价罚款，那可是要好几分钟才能赚回来啊。怕怕
2605	50w罚款对于这些企业来说，随便杀熟几个就补回来了，罚50w和罚我5块钱有啥区别，就少喝瓶水而已[吃瓜][吃瓜]
2607	315发，这是要打击大数据杀熟了？
2609	2块钱一个人看不多，但如果全国几百万人，那就是千万级别的差价了……我一般都是直接支付宝或者12306购买，以前没注意过，现在自己开车回老家更不会关心了……
2610	2020年疫情期间携程上给我爸买机票回来，两个手机同一个航班同一个日期不一样的价2333，我那个总买票的号就贵。
2611	2013年就有新闻报道酒店杀熟。
2617	10分钟的时间里我同一件商品下单退款了4次，因为每次付款后都会多给我一张价值更高的优惠券
2619	…看来以后还得多备几个手机，买之前都搜一遍[辣眼睛]
2621	【天价罚款】
2623	《大数据价值堪比石油》
2626	“政府需要介入，并瓦解谷歌和脸书 ”
2630	_水先生回复 @川普表弟约翰逊 :机票价格本来就是固定的，多少钱只取决于打折力度
2631	_爱刻所以我买东西一般都把价格限制到20元以内
2634	[笑哭]美团买元祖蛋糕，8寸的258，实付235，然后那天无意用老婆手机一看:优惠50。[笑哭]
2637	[辣眼睛]所以大家还是走出房门少玩手机吧
2640	[抠鼻]现在还在吃外卖的都是有钱人，没个五六十根本吃不到什么，难吃又贵，我是好久没用了
2641	[嗑瓜子]车票就用官方软件12306，用资本软件你是真的信任
2643	[狗子]点外卖越点越贵，隔几天价格还能降下来。。。大部分年轻人都有体验吧
2645	[翻白眼]滴滴越打越贵，不知道是不是杀熟
2646	[吃瓜]所以我用谷歌手机。
2648	[吃瓜]每次打开拼多多都感觉自己是世界上最幸运的人[滑稽]
2649	[吃瓜]就是罚款不够。一旦发现。罚到亏本就没人做了
2650	[吃瓜]不用不就好了？这些东西除了刚出来时候用下，之后懒得用，毕竟要不然买五菱宏光MINIEV干嘛！可惜五菱不给我打钱
2653	[tv_皱眉]很少住酒店，我现在机票只用招商银行，因为有优惠。也对比过航司官网（厦航白鹭会员）和飞猪，招行持平，用了优惠券后更低。本来疫情前回家的航班坐了能有返2个月内的-20优惠券，这样回校还能用，结果直接不用回校。[tv_鬼脸] @招商银行APP 点名表扬一下。酒店的话最近一年只用过万豪旅享家了，出于对阿里系的不信任，没有绑定88会员，我怕他到时候这也给我拿去用大数据做用户画像侧写了[tv_白眼]
2654	[OK]住酒店两部手机价格最高相差200块！！！
2655	[doge]自从几年前看到美团上我同事的点餐费比我便宜一大截，然后一个公司里一起点同一家店价格差异明显，当时就卸载美团了 [辣眼睛]
2659	[doge]说好了就是经济进步了，行政处罚款数目，20年前够罚，20年后......就蚊子肉了
2660	[doge]请问罚款力度牛逼吗，还敲打，笑死了
2662	[doge]难道资本才是公司的内核？
2663	[doge]大数据神神奇，不好证明杀熟，却可以人脸识别
2665	@携程旅行Ctrip
2666	@携程
2669	@腾讯视频@支付宝 @淘宝 @京东 @美团 @滴滴打车 @饿了么 .出来溜溜啊，怎么不说个话了？现在被曝光了，要当鸵鸟了？在我乡下，这种行为叫：钻狗洞
2670	@腾讯@美团 @滴滴 @阿里巴巴 @饿了么 @飞猪
2671	@腾讯@阿里巴巴@同程艺龙@京东@滴滴@美团，
2672	@腾讯@阿里巴巴@同程艺龙@JD@滴滴@美团[doge]
2673	@腾讯@阿里巴巴@京东@飞猪@滴滴@美团@饿了么
2674	@腾讯@阿里巴巴@滴滴@美团
2676	@腾讯 @阿里巴巴 @同程旅行 @京东 @滴滴 @美团 资本家[呲牙][呲牙][呲牙]
2677	@腾讯 @阿里巴巴 @同程旅行 @京东 @滴滴 @美团 爬出来[吐]
2678	@腾讯 @阿里巴巴 @同程旅行 @京东 @滴滴 @美团 心里没鬼的出来表个态[笑]
2679	@腾讯 @阿里巴巴 @同程旅行 @京东 @滴滴 @美团 装死呢？出来洗地了。
2680	@腾讯 @阿里巴巴 @同程旅行 @京东 @滴滴 @美团
2681	@腾讯 @阿里巴巴 @同程旅行 @京东 @滴滴 @美团
2682	@腾讯 @阿里巴巴 @同程旅行 @京东 @滴滴 @美团
2683	@腾讯 @阿里巴巴 @同程旅行 @京东 @滴滴 @美团
2684	@腾讯 @阿里巴巴 @同程旅行 @京东 @滴滴 @美团
2685	@腾讯 @阿里巴巴 @同程旅行 @京东 @滴滴 @美团
2686	@腾讯 @阿里巴巴 @同程旅行 @京东 @滴滴 @美团
2687	@腾讯 @阿里巴巴 @同程旅行 @京东 @滴滴 @美团
2688	@腾讯 @阿里巴巴 @同程旅行 @京东 @滴滴 @美团
2689	@腾讯 @阿里巴巴 @同程旅行 @京东 @滴滴 @美团
2690	@腾讯 @阿里巴巴 @同程旅行 @京东 @滴滴 @美团
2691	@腾讯 @阿里巴巴 @美团 @滴滴打车 @京东
2692	@腾讯 @阿里巴巴 @美团 @滴滴
2693	@腾讯 @阿里巴巴 @滴滴 @美团
2695	@腾讯 @美团 @阿里巴巴 @淘宝 @拼多多 @支付宝 @饿了么 别装死啊，都出来溜溜
2696	@腾讯 @阿里巴巴 @同程旅行 @京东 @滴滴 @美团
2704	@淘宝 @京东 @滴滴 @美团
2705	@淘宝
2707	@去哪儿
2708	@拼多多 砍单砍疯了[嫌弃]
2709	@拼多多
2710	@美团外卖
2711	@美团外卖
2712	@美团，@腾讯
2713	@美团，@饿了么，@腾讯，@携程旅行
2714	@美团 @狗东 [doge]
2715	@美团 @饿了么
2716	@美团
2717	@美团
2718	@美团
2719	@美团
2720	@美团
2721	@美团
2722	@美团
2723	@美团
2724	@美团
2725	@美团
2726	@美团
2727	@美团
2728	@美团
2729	@美团
2730	@美团
2731	@飞猪
2732	@滴滴出行
2733	@滴滴
2734	@滴滴
2740	@阿里巴巴@腾讯@京东@美团
2741	@阿里巴巴 @美团
2746	@ 美团
2747	@ 美团
2751	作为正在学大数据专业的我。。。了解了[doge]
2754	最近硬币给的特别大方，担心被大数据杀熟。所以，只白嫖，装穷屌丝。
2755	最近某猫不就大数据杀熟嘛，还一下子把热榜下了
2756	最近出了什么大数据杀熟的事件吗？
2759	最后关于手机依赖方面我觉得有问题，手机所带来的便捷中产生的价值远远大于你被大数据薅走的价值，所以说用手机获取信息没有什么可担忧的，我们没必要去批判这种信息获取方式。
2762	最好就是出政策，不允许杀熟，出现了要赔偿[吃瓜]
2764	总结小技巧，平时不要在浏览器或购物APP上搜索轻奢物品，（以下是我个人意见）如果能做到的尽量不要给APP读取浏览器的权限。
2766	自从在淘宝被性感内衣勾引进去看过一次之后.....[doge]
2769	装穷没用，都不用你自己填地址，你的gps、你的wifi信息app都知道，那么你的亲友关系、你住哪里，住的小区单价多少一平都是显而易见的。
2772	主要是旅游网站杀熟
2774	周柃不要用手机[doge]它会监控你[doge][doge]
2775	终焉谱写者你这反应慢了，携程我两年前就删了[偷笑]
2776	终焉谱写者回复 @不可说不可说l :很多时候是输入法出卖了你，APP读取你的输入记录然后根据关键词推送广告给你，明白了各大流氓平台为什么这么热衷做输入法吗？[抠鼻]
2783	只有大数据才能对抗大数据
2785	只要我足够穷，它连我的大数据都拿不到[doge]
2795	只要我够穷，资本就割不了我[热词系列_知识增加]
2798	只要我够穷，你再大的数据，都是杀不死我[呲牙]
2799	只要我够穷，大数据也拿我没法[doge]
2800	只要我够穷，大数据就拿我没有办法
2802	只要我够不要脸，大数据就伤害不了我[doge][滑稽][妙啊]
2804	只要我发不了苗，资本主义镰刀就割不了我[热词系列_知识增加]
2805	只要我的手机能帮我上班赚钱，我就没什么要求了[OK]
2807	只要够穷？看看你们，这说的是人话吗？应该这样，只要我们够富，就不在乎大数据杀熟[doge][doge][doge]
2808	只要等到我大会员到期就注销账号
2809	只要不落入资本陷阱就行是吧
2811	只看不买【画风突变】【画风突变】【画风突变】
2812	只会嘤嘤嘤的大怪兽回复 @冰_蓝 :我也遇到过，点外卖给我扣折一元，我朋友刚创的号扣5元[大哭]
2814	之前微信没钱了去一直点外卖的那家店吃饭，结果我发现我一直买的那份套套餐原来这么便宜，然后我就再也没点过外卖。
2815	之前淘宝给我定义是宝妈，我佛了，我个花季少女，干她妈的
2816	之前点外卖，我和我室友买同样的东西的价格就不一样，我吐了，苹果手机买东西要更贵一点是真的
2817	之前必胜客app外卖费10多块，美团饿了么好像才5块还是9块
2818	真没啥用，手机都能监听你的日常通话了
2819	真话，大数据杀数真的是唉！只能说科技进步的太快。想玩怎么都可以玩死你，把你的钱乖乖交出来。
2823	这真的是意淫吧，首先外卖不熟悉，淘宝我是懂的，商品是一个个商家，并不是淘宝平台，不存在杀熟，up说的浏览搜索低价商品，你确实会以后都看到低价商品，用户画像确实存在，那是因为淘宝有千人千面，你搜索便宜的东西，淘宝就猜你喜欢便宜的东西，从而提高成交率，并不会让一个本来贵的东西变便宜，所以伪装自己的购物习惯不利于买到自己想买的东西。
2824	这样啊我说我的外卖券怎么都是50-4那种的..
2825	这是真的，我原神卸载了二次，昨天直接单抽五星魈。终于找到答案了
2826	这是一种美德回复 @骑着小摩托要飞天 :毫无隐私可言
2833	这颗草莓不酸是的！而且活动力度很给力！便宜很多，但要天天去看价格
2837	这狗是京东么
2840	这个视频也是大数据推给我的。。。
2849	怎么样建议B站？咱们建议他弄两个板块吧，一个是大数据分析推荐，一个是随机推荐。热门推荐的话已经有板块了。
2852	怎么薅美团的大红包[灵魂出窍]
2859	在家呆了这么久一次外卖都没点，现在美团饿了么隔三差五给我发短信，说我有红包
2860	在大数据局工作的路过
2862	再也不想续费88会员了，这次淘宝天猫杀熟太让人失望了
2863	再跟你们说一件事。同一个类型像外卖啊之类的，你下好几个同类型的软件。，那种垄断性的就不要管它了，那种你也没办法。，他们会相互窃取数据的。T^T然后你就可以选其中一个便宜的就好了。，就像拼多多有些手机同一模一样的，卖了1400多，有些卖1700多。然而那个1700多的还是有人买。，主要是看你想不想省钱了。
2864	运营一枚，你们用的看历史最低价的插件其实不准的，我们为了调整历史最低价的门槛提报活动，会把A换成B那，你们看的是A的最低价，可是B可以做得更低，那些时候，我做个比最低价再低，你们就没办法，人在飞机，刚下美国，匿了匿了
2866	原来我不出货是因为fgo大数据杀熟[doge]
2869	御坂00241号哈哈哈我还以为就我一个人这样。管他啥价格，自己买着开心就好;开心才是无价的，感觉为了一点钱花费大量时间精力，弄得心情烦躁才得不偿失。
2871	于是外卖平台大数据判断看过这个视频的人就没法白嫖红包了[热词系列_知识增加]
2872	有天晚上出去散步的时候在和妈妈聊Miss candy的温变甲油（ps：没带手机）回家拿了手机想看一下当当网的书发货了没有，一点进去就看到了搜索栏的那个自动关键字推送：指甲油 温变美甲 草，那天给我吓得够呛[灵魂出窍]
2877	有人说提升自己时间的价值避免浪费时间在不值钱的比较上，其实这根本是伪命题。价格歧视本来就是陷阱，心甘情愿跳进去还帮人数钱也是Q的过火。欲望是无止境的，提升也是伪命题，从一张卫生纸到万亿的科技公司，永远有高攀不上的，开10万车的整天看20万的车，给你2万的优惠立马就想贷款被捆绑上。只要你够冷静，立马节省百分之100.[滑稽]
2880	有假奶粉，你选择购买进口的，有雾霾 你选择戴口罩，有假奶粉，你选择购买进口的，有假疫苗，你选择了去大城市接种。有假货，你需要学会如何辨别真伪。现在有了大数据，你告诉我如何设置自己的手机。做人要学会思考。法律到底有什么用？
2881	有个公众号外卖美团饿了么天天有五块以上的优惠券。。。。
2882	有毒吧，我淘宝都给我推送情趣内衣
2883	友情提示，使用比价网站的时候就是最容易泄露个人信息的时候哦。
2886	优惠券还是挺多的，反正我基本不用。花钱主要还是买个开心，我点外卖花半小时我都不想点了……本来购物欲就不高淘宝一个月也就是三千左右。就是要么省时间要么省钱的一个选择吧，在家闲着薅羊毛（合法情况下）到挺好，平时工作就够累了，为了几十块钱忙活一个小时性价比真的不高。大品牌的价格基本是稳定的，小东西看个人选择和时间成本。手游这个东西真的是，回归特别有用。我炫舞手游半年没玩儿突然欧了起来哈哈哈哈。所以几个游戏换着玩儿可以很大程度提高欧气。
2889	用手机版B站，信息茧房的厉害，都推荐的是你感兴趣的，让你想不起看别的
2892	用另一台手机，上哔哩哔哩不登账号。你会发现更多优秀的视频。
2897	因为这个视频一个秃子默默的卸载了痒痒鼠，有默默的安装了回来，一切做得都悄无声息
2898	因为有时候会把淘宝当成百度用，所以他们无法看破我
2899	因为大数据瑞幸咖啡又要噶资本主义韭菜了吗？[doge]
2902	以后阴阳师和明日方舟早上下载晚上卸载
2903	已经卸载了uc. 抖音.快手。一下一步卸载手机浏览器。
2905	一周一次外卖或者半个月一次
2906	一只新UP呦【人类进化史】大数据杀熟的根源是什么丨思维工具进化史
2908	一只白里透红的羊驼回复 @过郤2020 :看完了可以看看这个补充一下【人类进化史】大数据杀熟的根源是什么丨思维工具进化史
2912	一直不会喵的加菲猫这种直接投诉运行，它是根据基站来获取的大致地理位置。 然而这个位置标明的是我们的个人位置，所以它依旧属于窃取用户隐私。
2913	一直不会喵的加菲猫那是京东拍的。
2914	一直不会喵的加菲猫回复 @Deer上杉 :只如果是单纯的买东西的话，我觉得买百亿补贴的还可以，当然有些是故意涨价以后再降价到原来的价格。
2926	也就是说不许消费者投诉快递外卖小哥的种种道德绑架十之八九都不合理。大数据能让我吃到高价外卖就代表它有能力让我准时吃到外卖，毕竟城市交通可比我的消费习惯容易分析得多。只能说自己不投诉还拦着别人不许投诉的那些人，你们是被资本绑架的善良，还害得其他消费者难以获得正当权利。
2927	也就对偶尔点外卖的人有点用吧 像我每顿饭都得靠外卖 根本没用 该杀还是被杀
2928	爷讨厌谣言[抠鼻]有些人懒得做或者没时间做才叫外卖的[抠鼻]
2929	要用数据打败数据
2931	要用大数据打败大数据
2932	要被禁止了……
2935	学会了，这就去卸载游戏[doge]
2938	学到了快删
2940	学到了，这就卸载阴阳师
2941	学到了，这就卸载b站[阴险]
2942	学到了，这就是去跟马云对线
2943	学到了，这就去卸载崩坏3
2945	学到了，这就去和美团对线
2946	学到了，这就去和大数据对线
2947	学到了，这就点取消关注
2948	学到了，卸载b站
2949	学到了，待我带上钱包去干翻大数据，凯旋归来之日即是我三连之时!钱包是空的？溜了溜了[doge]
2951	学大数据专业的我，有点慌啊[doge]
2955	兄弟们告诉你们点外卖美团饿了么都下同一家商铺价格不一样
2956	星空无涯但有我应该是京东的宣传片[妙啊]
2957	星辰樱落大数据杀熟是指同样的商品或服务，老客户看到的价格反而比新客户要贵出许多的现象。
2958	信息不对称的情况可以通过时间成本的消耗来缓解，问题是现在资本将优惠方式复杂化，时间成本过大，很多人直接放弃。有没有什么好用的平台或网站来直观比较并有一定计算的吗？
2961	卸载软件啊！[滑稽][吃瓜]
2962	卸载京东（等等，我没下载）
2966	消消乐卸载了重装回来 闯关老简单了
2970	香浓幼滑回复 @ACG的中科院化学所 :“慢慢买”，我用来查历史价格，这个能查的时间好像比其他的长一点
2971	香蕉看看我特！tmd我就只用了一个携程，我都没有对比的。要考虑考虑想一想。删不删了
2974	下一个季后淘宝也这样，不过也不一定。有的不降
2977	喜欢加拿大商家的做法。只要别的店比自家店便宜，就按别家店价格卖。全网一个价。
2979	西西西西瓜2只买不看的号，实际上毫无卵用。买的不就是 只看不买选的
2982	我最讨厌的就是大数据 。。小米浏览器看了个视频全给我推一样的。。还有b站
2983	我只想关b站大数据 做的太烂了
2985	我直接不点外卖
2988	我这的外卖平台除了新用户第一次点餐之外，就从来没有优惠卷，爱点不点，
2989	我在学校点外卖都是有红包才点的，什么外卖节美食节送优惠券，10元到15元优惠，最低用0.01来点过一份外卖，就算优惠券大于你买的外卖都不会显示0元[喜极而泣]
2992	我因为手机内存的原因反复卸载游戏和购物软件很多次了，真的发现有些不同特别是阴阳师[doge]
2995	我现在利用大数据淘宝省钱??
2998	我淘宝账号因为开店上架了一个东西还没卖就被封了，之后我一直用那个绑定的支付，后来有一天我用Pdd买东西选支付宝付款，过了1天，淘宝发邮件说解封了我账号
3004	我们要反思的从来不是大数据杀熟，而是我们是不是太依赖手机了?现代科技解放人力是不错，但是太过依赖反而会变成韭菜，任谁都不想变成一个任人宰割的韭菜吧?
3005	我们现在与外面接触，了解，购买等等，大部分都是通过手机，手机差不多可以算是个人身份信息量最多的一个东西，却是我们自己最无法掌控的东西，软件各种权限，偷看你的软件使用，文件，照片等等，甚至部分软件你不给权限就无法使用，即使这个权限个软件内容完全无关。
3007	我买东西喜欢淘宝和京东两边对比 京东大部分时间都比天猫旗舰店卖的便宜
3008	我买东西很少上淘宝狗东，那的东西真的是....质量令人堪忧，好看的衣服那么便宜，买回来摸一下就跪了[笑哭]还是实体店比较靠谱
3010	我妈天天玩拼多多浇水挖矿什么的，月卡29.9，我就买买东西也不频繁，月卡3块[滑稽]
3011	我妈帮我姥姥买东西，因为我申请了什么锦鲤卡，然后我叫我妈把链接给我，我复制打开省点花APP跳到淘宝，然后我妈手机上的95元的椅子??在我手机上变成了109???我问卖家咋回事，然后我再复制跳淘宝变回了95???
3012	我两个手机，四个号码，没红包绝不点外卖
3014	我利用大数据，玩王者荣耀黄金上钻石??
3019	我觉得我货比三家根本没有用 因为我买电子产品首选京东 京东好一些
3020	我觉得手机是有监听的 不然怎么做到的语音唤醒SIRI 小爱 之类的？
3024	我就说去年为啥饿了么一天到晚送我一堆15减5，20减7的优惠券，现在想来是当时购物车添加的东西嫌贵懒得买就放那没管然后忘了。。。。[喜极而泣]
3026	我就被宰过，跟同学出去玩在携程定旅店同一家店我同学手机上350一晚，我手机上530一晚，，，，，已经把携程删了，，，，，[无语][吐]
3027	我经常没白嫖到美团会员优惠券，不过1月份5块买的季度会员就用了5张，到现在还没机会吃外卖
3029	我经常利用大数据获取我想要的东西，在淘宝上就是先搜索一些东西，然后过段时间看看淘宝推荐，就是各种各样的同类型产品，会有一些意想不到的精品，或者利用大数据实现b站看片，只要你搜索一些很色情的关键词就可以了，搜索结果当然不会有，但过段时间首页就会给你推上来了，你只要把这些推给你的视频全部点赞那么给你推的类似视频就会越来越多。
3030	我姐上次回家就是淘宝买机票，她用的苹果我用的安卓，她的机票钱就是比我高了一两百
3032	我和我朋友同时看一套板u， 同一家店，他1500我1700，在京东。。。(:з っ )っ我tmd惊了
3036	我还是很喜欢大数据的，我只看了UP的视频下次这个更新时就会自动推荐给我。我根本不需要关注[滑稽]
3038	我逛淘宝就只逛不买，只逛jk服装区[抠鼻]
3039	我逛淘宝就喜欢按销量排，然后找个第十名左右的[妙啊]
3040	我刚在酷安里看到有人说被大数据杀熟，然后就看到另一篇关于避免大数据杀熟的文章，再之后打开哔哩哔哩，就看到你这一个关于避免大数据杀熟的视频。这叫我怎么避免大数据杀熟，我已经被杀了吧[tv_白眼]
3041	我刚在饿了么遇到。我姐点外卖比我便宜两块
3042	我刚开始都是在高德地图上叫车，后来发现滴滴打车便宜点。反正我点外卖至少八块优惠券才点。
3043	我发现淘宝真的屏蔽低价商品，我购买960显卡，搜索出来的价格平均都是390～410，于是每天翻商品，差不多翻了3天50个商品找到了339的显卡
3044	我发现京东只要把东西加入购物车，或者每天都点进去看看，过两三天就会降价[抠鼻]
3045	我都吃泡面了 难道大数据的康师傅卖5块一桶[捂脸]
3046	我懂了，我这就去卸载阴阳师
3047	我点外卖都是超过8块就不点了，学生党没钱啊，有时候下课还晚
3048	我点外卖的原则就是，要比我去店里吃便宜，不能省钱的外卖没有被选择的价值[呲牙]
3049	我的淘宝推送一直天天换不同种类的商品[呲牙]原因特别简单相信你们可以猜出来的[偷笑]
3051	我的妈，吃个饭还要跟手机斗智斗勇，太不容易了，手机本来就是消遣的地方，这样玩个手机也太累了[笑哭][笑哭][doge][doge][doge]
3053	我当初在财务培训行业做，有一期请了业界内非常有名的老师讲财务智能化，她举了个自己的例子，头一天和朋友微信聊天说某某的包挺好看的（老师说第一次聊这个话题，这个包）第二天车上进淘宝，淘宝就给她推荐了这款包包。。。。
3054	我从没给b站开过位置服务，它的广告竟然说：XX的小伙伴注意了，来b站工作....
3055	我成了b的韭菜，卸载卸载
3056	我不依赖这些电子产品又怎么来B站看你的视频的？
3059	我不但没有成为外卖大数据杀熟重灾区的一员还差点成了个送外面的[doge]
3062	我B站推荐都是小姐姐也是大数据导致的。
3063	问题就是，就算知道价格高了，也还是要买，毕竟东西我是真的需要啊，并且没有时间多等等。
3066	为啥我和朋友聊天聊一样东西中途都没有碰手机 然后打开手机软件刚才讨论的东西就直接在主界面了 太吓人了
3067	为了让大数据觉得我是个穷人，我决定不投币了[妙啊][妙啊][妙啊]
3069	微信关注卡饭乐购，然后在那上面买吧，不用谢[OK]
3070	微笑的丘比我一般美团了，然后去店里和老板联系，老板就以很优惠的价格给我，不用被美团宰，而我也享受了优惠
3071	危言耸听呗，社会不用进步呗，原始社会永远没有你担忧的这些，咱都当原始人呗
3072	网页端，不登录查价格，则如何？
3074	网上买东西我都是浏览器不登录账号然后搜索
3075	网络不存在隐私，在大数据的时代我们都是裸奔的人
3078	完了，我天猫购物车里还放着一个28，000，000的游艇
3081	外卖我是只点在实体店吃过的，卫生还有价格都清楚。点餐时候美团，饿了么都看看，哪个优惠就点哪个。比较喜欢饿了么，可能在饿了么平台上的店没美团多，所以送餐比美团快。而且感觉饿了么优惠大一些，有一次用饿了么点肯德基，结果送错了，把另一个人的美团单子送给我了，那个人点的东西比我少却比我贵十几块
3082	外卖是真的坑，我第一次点了一份北京烤鸭总共32元，同学买了相同的54元。然后我就开始找周围没有用过外卖软件的人点外卖，平常几乎不点外卖
3086	外卖？杀熟？[滑稽]两家都装，换着用，以前的价格我记得
3089	突然想通，王者荣耀抽商品折扣也是这个道理，恩！暂时删了吧，等有活动再回归。
3096	通过手机网络的中介，你选择的并不是真的就是你选择的，你是被选择的，筛选出来的信息都是通过为了赚钱的“中介”二次加工后带给你的
3097	听完视频，我打开拼多多，三十五十的优惠卷！
3098	听你的，卸载b战
3102	淘宝一个会员，我两个号价格不一样哈哈
3103	淘宝太明显了，我两个月淘宝不买东西。。“我的”界面就会出现一个签到领红包的活动[无语]
3105	淘宝的杀熟最恶心，买了88vip会员，但是之前在天猫超市买一洗发膏，我看的是77块多，我妹没有会员的号看同样的货却只有60多一点，问客服，说是88vip之前已经享受很多优惠了，只能调高价格，那我还花钱买那个会员干啥，不办会员都比我便宜十多块，太坑了
3106	淘宝的千人千面绝了，当初去搜索ps4pro显示2700然后我对比别人的只要2000……
3108	太真实了，我发现我电脑上推送的广告都是学习，网课，知识付费，手机上碰到的都是购物，打折和各种游戏。。。。这年头简直没有隐私可言了
3109	太小看大数据了，绝对不是算法公式那么简单，千人千面，多维关联，甚至某些app会调用麦克风识别你平时聊天的关键词，进行精准广告推送。这里就不点名了，怕被告。
3112	所以这个视频旁边就是京东的广告
3119	所以大数据是啥？[tv_疑问]
3123	孙笨的激昂回复 @水月の霖 :绝大部分人都不懂，也无所谓，只是真的恶心人，不给权限不让用，不过我现在也无所谓了，反正我个人信息不值钱
3124	虽然我很穷 但我经常看啥surface啊 破海盗船啊。。马云爸爸你注意下你数据库，那个看起来很有钱的账号删一删
3126	虽然看历史价格这个功能不错，但是淘宝好些店（服饰类）是利用各种优惠券或者两件X折降价的，所以实际付款比写的价格低，历史价格也就没有了参考意义，除非自己收藏了一直在关注
3129	私的WULI恶趣味好像是个短篇，关于手机囚笼之类的
3131	丝宝第二次做骗大数据的视频了，丝宝????????抱
3133	说实话。。。有一次我在拼多多不小心点进了男性丝袜。。。然后推送就变得不正经了起来
3135	说那么多没用，能和大数据 对线的 只有法律。 但是 唉。
3136	说了这么多，我个人觉得时间成本更重要，这样做反而更亏。大数据杀熟就跟以前的奸商一样是一个道德品行的问题，我只但求这个社会可以更好，少一点杀熟，多一点真诚待客
3137	说来你们可能不信，我们信息老师给我们看老丝视频让我们了解一哈大数据[喜极而泣]
3150	是时候卸载b站了[doge]
3154	是不是把B站卸载了，就会送我大会员？
3156	视频这条狗不是京东吗？
3168	深有体会，长时间购买同一家的外卖，几天后派送费瞬间增加，店铺优惠立马减低甚至是没有。
3174	少索取物质飞机票火车票不杀熟就得了
3175	上午才在酷安看到一个关于大数据杀熟的评论[疑惑]下午就刷到了[疑惑][疑惑]
3177	上期刚跟达摩院合作，这期就跟天猫作对了吗[偷笑]
3184	杀熟真严重的是票务和酒店，而不是外买
3189	杀熟？不存在的，只要我用三台手机换着用就杀不了我！[滑稽][滑稽][蛆音娘_卖萌][蛆音娘_滑稽]
3193	杀熟，信息不对称
3196	三哥有点儿怂京东买东西不要急，先把东西加购物车一个月，然后观看他一个月的价格变化，基本上就能确定他底价多少，然后每次都在他底价的时候买多一点就好了。
3199	如果网站实体店都一个价格，哪来的这些花招？网购得了便宜自然有副作用。
3201	人性啊[OK]玩16个钟头手机，休息[星星眼]
3205	让我想到了b站日益上涨的大会员价格[微笑]
3206	让我感觉到了准备两部手机的重要性！
3207	然然3对对，我和我室友经常发现这样，贼恐怖，比如说刚和室友说想买个床桌，然后打开淘宝默认搜索推荐就是床桌……
3208	然而最后你的“省时间”和“自我提高”不过是脱离生产本位的资本扩张 等到支撑力不足的那天 你的“提高”无法追赶通货膨胀的速度 你却中了消费文化的陷阱养成了诸多毛病 你被抽干的不仅是资本 还有你自己的“宝贵时间”
3209	然而现在电商活动不降价了，发优惠券。你查历史价格也不准确。[呆]
3210	然而大部分人的三观都是网上获取信息建立起来的[无语]
3212	确实杀熟，我淘宝88号和我妈的有时候买东西价格不一样
3213	确实，上次京东买个电纸书结果不送外壳，单买外壳得加几十块。我就收藏关注不买，过几天就收到优惠短信送外壳了........我好像还问了客服送不送呢~~
3214	确实，连着半年基本一天不拉全是饿了么，最开始吃一顿甚至能稳定五块左右，甚至偶尔还能遇到几毛钱一顿饭，后来到快放假那几天基本都是一顿饭十几了[tv_皱眉]
3217	去年618准备买手机，我同学跟我说有个两百的卷，我找了半天就是没有，然后重新下载没登录就找到了。
3218	求最后看手机的小动画
3228	瞧不起谁呢，删了天亮发[doge]
3229	瞧不起谁呢 删了 重发
3233	前面还看的挺好的，后面不赞同，虽然产生了依赖，但实际上是由于便利性等一系列好处才导致这样的，这是高科技发展带来的必然结果，总不可能不用这些反而采取时效性便利性很差的手段去干其他事情吧。人性本惰，为了更好的偷懒，为了更好的生存，科技才会发展的越来越快。
3236	前几年一直用惠惠助手插件，后来好像不太好用了，换成别的了，手机用慢慢买，比价器是个好东西
3238	企业里面的数据分析师和程序员的大学4年不是白读的
3239	骑着小摩托要飞天你怕是没体验过天猫精灵的恐怖，在家就跟家人说要买什么，因为天猫精灵开着在，晚上打开淘宝，就给我推荐我要买的
3241	其实这并不是手机的问题，手机只是现代科技的载体。现代人真正依赖的是高速发展的科技，只不过科技的成果通过手机的软件和硬件呈现出来，给普通人使用，方便你的生活，只不过这个方便被商家加以利用了。扯远一点，如果各行业的科研人员，不去使用今天的科技成果，没有与时俱进的科技加持，医药、计算机、机械设计甚至是服装制造，都将难以产出甚至直接消失，化作人类的想象，而这也反过来进一步制约各行业的科技发展。而话又说回来，即便作为普通人的你，放下了手机，你又能真的自律起来，去运动去社交去开发兴趣或者提高自己吗？人总是会为自己找借口，各个时代都是一样，古代人怨花鸟鱼虫分心，近代的人责怪报纸收音机分心，而这个时代的借口，恰巧是手机罢了。
3242	其实我上拼多多买的最多的就是游戏家电（当时百亿补贴）花了差不多7K买显示器，ps4，组了一台电脑，几个游戏盘，真就nm变得不正常了
3243	其实两个号就能解决，一个号只看不买，一个号只买不看
3245	其实up说得非常有道理。但是，有钱人不会在乎多花那几块钱的，所以甚至是他们连大数据在控制他们的消费都不知道
3246	欺负谁呢，删了过两小时再发[doge][doge]
3248	平台读取手机唯一识别码后，就能与你的用户画像绑定，搞个小号、不登录都木得卵用
3253	泡沫般的回忆淘宝已卸载，非必要不会再下
3254	泡沫般的回忆刚从去试了试，手机没看出啥来，电脑上退出登录顶部的三页推介变了一半多，登录又变回去。手机的应该是根据视频记录改变广告吧，反正我没有。
3257	暖神そら淘宝要绑定身份证的吧，身份证最后一位数就是用于区别男女的[尴尬]
3262	你这个方法可以让大数据对你的购买力产生误判，而我就厉害了，淘宝到现在也不知道我究竟是男是女
3263	你怎么把孙杨视频删除了，不准备正面回应吗
3264	你以为就你知道 商家不知道吗？很多都是阿里巴巴和淘宝一起挂的 你以为的批发价都是正常卖价 淘宝卖的更高而已，买的永远没有卖的精
3267	你说外卖平台杀熟。逻辑上没错，但是你缺失了一个重要的点，商家。商家是拿不到美团的各种数据的。所谓美团后台给你的数据商家也是不准确的。关于红包折扣券的问题我做外卖有5年了。基本从刚开始有平台外卖开始我就在做了。折扣券本身是商家和美团共享平摊成本的，你所收到的各种券基本也是同一个道理。基本推广出去的券，不仅有商家的推广费还有和平台平摊成本的券。大部分主要是商家的推广费，优惠券这类的都是商家进行推广付费后开启的优惠券
3272	你发出来了，大数据又要更新了。还是换个套路继续杀。
3274	你的订单都存在人家数据库里了，这种情况换手机号才行
3275	你错了，大数据一点都不耿直，不知道电信诈骗么[奸笑]
3279	嗯没事，我看淘宝看的现在淘宝跟浏览器一样了[doge]
3280	嗯，像我这种网购喜欢买jk或者冷圈周边什么的，店家月销都少，价格完全固定在那里了，基本不可能存在杀熟。而且我也不点外卖不打车。不过抽卡手游什么的可以试一试。尤其是王者荣耀这种，放置半年再回来，上分超级轻松
3281	内个，我最近心情有点不好，不喜欢人多的地方，所以能请你们卸载b站让我一个静一静吗，不客气[doge][doge][doge][doge][doge][doge]
3282	难怪淘宝不登录不让搜索。
3283	奈何桥下无可奈何有些软件后台偷偷录音开摄像头，说过的话会识别关键词，所以，打开b站，淘宝京东会首先给你推送那些关键词商品，现在除了必要的社交软件，其他要录音相机的全禁了，还有，输入法也是重中之重，个别输入法会记录你打的字
3284	那只狗是京东吗？JOY
3285	那有没有大数据反杀反杀大数据杀熟呢？
3288	那其他各类历史价格查询工具呢，有哪些呢？[2233娘_卖萌]
3289	那么区块链和大数据有什么关系呢？
3290	那狗没抄袭京东我是不信的
3291	那个你们都知道大数据杀熟是啥吗[doge]弟弟我想了解下
3292	那个京东狗狗的动画在哪能看呀
3293	那个京东狗的动画片叫啥……
3294	那个，大数据杀熟是什么呀？
3300	抹平信息差，打乱消费习惯，最重要的是，不要事事依赖手机。
3301	明明是淘宝杀熟好吧！京东是杀商家
3302	明白了，这就卸载B站。
3303	明白了，这就卸载b站
3306	喵星人能有啥坏心眼er回复 @冰_蓝 :对。历史价格只显示直接调价，优惠券调价不显示的。
3308	面对大数据杀熟，其实可以多给差评[热词系列_害][热词系列_有内味了]
3309	美团因为这大数据杀熟上热搜了 昨天
3310	美团定酒店了解一下，都没有优惠券，也没有会员，六个人同时登录能有六个价，用美团小程序登录能有12个价，绝了[呆]公然的价格歧视没商量
3311	每天看看半佛老师的视频，从此愉快的放下淘宝京东，爷的理智（和手）又回来了[doge]（顺便点一杯1.8折的瑞幸咖啡，小日子乐无边）
3313	梅池曜回复 @凌冉霜叶 :阿里网络安全部：敢网络攻击我们软件？开门，查水表！
3316	没有大数据也明摆着杀熟啊 比如定外卖新人立减20元 熟人就不减了[微笑]
3320	没用，先涨到夸张反衬我们有品质，再出优惠券抵掉部分涨价，土豪不用优惠，穷逼抢优惠卷来提高热度，永远不亏，最后你还会讲妈的200-100真良心，其实呢大家都懂
3321	没用，大数据杀熟无解的。说再多也是被宰的，就像一样东西，你看到的价是539，而别人看到的就是519，一二十块的差距看不出来的。还有货比三家？你货比一万家也没用，因为你看到的全是基于你人群肖像推荐的。
3328	猫眼是真牛逼，三个手机同一场电影，三个价格
3332	马化腾/丁磊：低氪玩家你好，我是你的逼氪人。
3335	陆上哦豁，三个手机换着用
3341	两个淘宝号，一个给我妈用。她把商品分享给我，让我帮她买，她那里是50我一看要65[吐]我这是两颗钻的88vip号。淘宝真有你的
3342	两个饿了么账号，同一个方式抽红包，一个是30-5另一个是35-5
3344	例如马蒂安睫毛夹淘宝，拼多多都是4快多，一个，1688一个3快多，我刚买了一个[喜极而泣]
3348	老丝怎么看，点外卖用红包，商家会少给菜量的行为？
3349	老丝一到店，所有喝酒的人便都看着他笑，有的叫道，“老丝，你又去做视频蹭热度了！”他不回答，对柜里说，“麻烦关注转发，一键三连。”便排出九文大钱。他们又故意的高声嚷道，“你一定又在煽风点火，搬弄是非了”老丝睁大眼睛说，“你怎么这样凭空污人清白……”“什么清白？我明明看见你之前力挺孙杨，说的热血沸腾，现在苗头不对就光速删视频装死。”老丝便涨红了脸，额上的青筋条条绽出，争辩道，“骂白种人能算蹭热度吗？”接连便是难懂的话，什么我这是爱国，什么“为了打抱不平”之类，引得众人都哄笑起来：店内外充满了快活的空气
3360	老丝，你删了个啥视频啊，我收藏夹有个你的视频无效了，还忘了是个啥。
3374	垃圾历一件商品肯定不会因为一个人而涨价降价，都会通过大数据来判断市场行情，比较大的商家肯定也会拥有大数据链，就算个体经营户也会根据网络市场行情进行调整，除了一些真的不会经商的就老老实实开店做普通买卖吧。说是大数据杀熟其实还是资本运作
3376	可以再看看这个 【人类进化史】大数据杀熟的根源是什么丨思维工具进化史
3381	看完视频，点外卖的知识量又增加了??[doge]白嫖的能力也增强了[doge]
3387	看到外卖那我想起来以前我就被饿了么杀熟过。我是经常点外卖的，然后经常充会员，结果就是某一段时间饿了么一直送比较大的红包，我身边的人都有只有我没有，然后我开始呢还没觉得咋了可能是运气原因吧，后面就越想不对劲，然后我就跟客服说了这个事表示了我的不满，后面就有那种红包发我了。。。
3388	看到大数据，为什么我第一个想到的是叨叨记账，这个软件简直不要太了解人[喜极而泣][喜极而泣]
3389	看不起谁，才这么早，删了，过几年再发[doge][doge][doge]
3390	开头京东那只狗的动画叫啥啊[鸡腿]
3395	巨菠萝目前大数据真正对应的是服务行业里面的一种恶性策略，降低用户基础知识，让其浮躁，狭隘，从而提升粘黏性，依赖性
3396	巨菠萝当然只换不修也有同样的问题，只是资本壁垒会更高
3402	经常被京东大数据杀熟。不过我多个心眼，7天内，30天内有个退差价。电子产品能退20差价，买个洗衣机能退60元。买产品后经常关注产品实时价格，一看降价赶紧退差价。
3406	京东买的都是些常买的提价我是清楚得很！没事逛逛大型商场，米面啥的京东没那么容易坑我外卖也是[滑稽]有时候我是会去实际店面瞅瞅的！经常点的都是些吃过的店！酒店啊火车票就更难杀熟了！像同程一天是一个价两天就偷偷加那么几块钱房钱[无语]有时候就逼我一天一天的买烦得要死！手游有时候就真的佛系了我玩你是寻开心的你不让我开心我点你作甚？有的是游戏～～～(?￣△￣)?
3407	京东大数据已经能做到家庭wifi内所有人视为整体集合了，拿父母手机没用了
3412	借楼我有个视频是查价格
3413	解决技术发展带来的挑战不能靠拒绝使用或者减少使用来解决，这是一种倒退行为，至于如何解决，emmmm...谁知道呢[跪了]
3414	节省你宝贵的7分钟时间 手游卸载重装/隔段时间不用伪装成回归用户 购物网站和其他人比价判断价格 外卖类：无解 打乱消费习惯/抹平信息差异
3415	焦虑贩子，举报了吧。
3417	简单来说，就是因为苹果汇抽取30%，所以为了保证利润，那些游戏或者是软件厂商就会把那部分费用嫁接到用户身上，这个应该不是数据杀熟
3420	假如你把一个东西放在购物车里放久了……看着各种活动上上下下的价格，你就晓得这东西多少买合适了[吃瓜]有一说一天猫官方店有的是真坑
3421	既然大数据能被卖家用来杀熟，当然也能被用来杀卖家，大家可以使用各类历史价格查询工具和“什么值得买”这个app哦
3422	记得去年想在猫超买箱枣夹核桃，但是没满88，要邮费，正好室友也要在猫超买东西，我想就让她帮我买，凑单省邮费，然而链接发给她后发现同一件东西，她比我的贵。。。她是苹果手机，我是vivo手机。。。
3430	花开谁看防止被外卖杀熟，我把我用的应用管叫饿了美[doge]
3432	红包不到5块不买，价格上20不买，好像是你赚到了，吃着热腾腾的包成就感一下子就起来了
3433	很简单，大数据数据说话，你只要提供错误数据不就好了吗[抠鼻]
3436	和泉紗霧的丈夫淘宝天天给我推女童睡衣，内衣，丝袜，泳装，可能把我当孩子她妈了
3438	好猪被白菜拱回复 @Deer上杉 :推荐智行，我每次都用它定酒店，比美团便宜[呲牙][呲牙]
3439	好了我知道了，删了吧。[tv_doge]
3441	好的我现在就去卸美团
3445	薅资本家羊毛？是我飘了吗？[奸笑]
3446	还有旅游app没说啊，。。。
3447	还是拼多多 比较实在
3449	咳咳我是个学大数据的程序员…，我马上就回去更新代码
3451	哈哈哈，半年点一次外卖的我[OK]
3452	哈哈，我也是没有优惠卷不买系列。
3455	國漫君饿了么是更便宜
3459	广大劳动人民又双叒叕被资本主义剥削了，而且毫无反抗之力。
3462	关键是为了那点儿价格歧视的差价而消耗大量时间真的感觉很亏啊，没那么多闲工夫。可能我活该当韭菜
3463	关键是大数据知道谁和谁是亲属关系
3466	怪不得几个月没用美团，今天装回去开个会员只要5块钱。
3468	购物app是真的恐怖拼多多现在出了一个功能叫做拼友圈在里面它会吧你购买过的东西同步发送到圈子里除了特别隐私的东西不会同步别的买过的东西都会给好友看到虽然前提说要手机号添加好友同意才行.但这样也明显利用了我们自己的一些隐私.最后的方法就是关闭这个功能.卸载了...
3475	淦，光看短片没听清说啥，就知道听了个外卖
3479	感觉公司不应该有权利使用这些数据
3484	非常傻的大鱼鱼有不少，比如禁止一切定位权限，前置摄像头跟我一样用电胶布挡上，24小时全局tor代理，上网页尽量开无痕，设置自动清理cookie.这样的（都是有效的办法，挨个用很好）
3485	放进购物车，点击降价后提醒我。OK
3487	防止杀熟很简单你要买什么就用你爸妈孩子老婆的账号就行
3488	反正我买完东西评价会发自己购买的订单价格截图。前两天匹克态极那个价格乱七八糟的便宜的340到手，贵的四百多。服了。
3489	反正你经常点低价货点了又不买，人家就会觉得你是个队价格很敏感的用户，下次就会给你推打折的东西了
3491	反杀大数据
3494	饿了么天天发红包，结果在美团一看，有些同一家店在美团没红包比饿了么用了红包还便宜[2233娘_汗]
3496	额全是我玩剩下的王者卸载了1年了，还是抽啥啥不中
3498	多账号切换着用
3500	对付大数据杀熟最好的手段就是基础知识。。。。因为大数据杀熟为了几块钱实际上很亏。。。实际上大头是变种的快销，比如给你推具备计划性淘汰的电子产品牌子，然后只修不换，但这个成本已经在价格里了，换句话说就是卖服务，产品实际上很垃圾，一旦用户具备了电路知识后不仅能自己修，还可以在购买的时候直接看出易损点然后权衡是否购买，或者进行改造，对于不给看内部的电子产品直接pass
3501	断网玩了一局游戏，再上淘宝就是这个游戏周边
3502	毒 收藏过的鞋子 过段时间全涨价 取消后过小段时间又回归原价 太恶心了
3510	动画里的小狗是不是京东那只？[doge]
3512	懂了，这就卸载B站
3513	懂了，现在就开始白嫖up主的视频，降低数据对我的画像分析
3515	懂了，马上跟大数据对线
3521	电脑端不登录看，看好了手机端下单
3524	滴滴杀熟太狠了，后来我用支付宝的高德打车了。
3525	滴滴和美团杀熟最该死
3526	滴滴打车杀熟怎么破？自己买车
3531	当时阴阳师刚开服时玩了一年得了个月见黑卸载了 昨天下回来了几十抽就一个sr[笑]
3532	但是手动收集信息真的很累 就像我为了找一个游戏的口碑 翻贴吧翻NGA翻评测视频 找各种网站综合评分 找实况看游戏是否符合自己 在确定我要玩之后 去淘宝翻去京东翻 找来找去找一个差不多的 下单 这套操作下来怎么也得两个小时 这都是闲的没事可以干的 就像视频里说的外卖 我一般都是中午饭的时候点 吃饭的时间就那么点 在我饥饿的情况下 又要考虑口味卫生又要货比三家 同时还要计算一下剩下的用餐时间 而且这些做完还有工作要继续 我实在没精力去陪他们搞这些东西 有时候只要不是特别离谱的价格 我让他噶一波就噶一波了 （价格最离谱的就是KFC 我公司楼下有个KFC 配送费9块 我翻遍了外卖平台这个距离就没一个能超过5块的）
3534	但还是不得不说大数据带来的好处更多啊 可能在价格方面会高一点 但也没多少 就这一点。多了你也不得富 少了你也不得穷 平台杀猪也不可能吧 （反正我没见过）
3536	大数据最让我无语――在京东不小心关注了杜蕾丝，当时不知道，后来在购物车看到了男士保健等产品，这时才注意我关注了杜蕾丝。取消关注后，也屏蔽了那些东西。然而没有用。还是有那些保健产品[无语][无语][无语]
3537	大数据专业路过[OK]
3538	大数据杀熟最早我记得应该是携程，外卖可以少吃，淘宝京东也可以少买，但外出的机票酒店那可真的就是刚需了，外出办事，不花那个钱也不行啊
3539	大数据杀熟最明显的就是，网易云上不能乱听歌，不然日推就丸了[doge]
3540	大数据杀熟其实就是同样的商品不同人购买不同价格，目的是为了增加商家利润。
3541	大数据杀熟本身是可以避免的，这不是正常的现象。完全是少数资本家为了掠取资本而使用的奇技淫巧。但这事实上也算是一种暗箱贸易，平台为你每天提供优质服务，你不自觉的付更多的钱。
3542	大数据杀熟？只要给它的数据是薛定谔的猫，有种它去解薛定谔方程。顺便暴打不准道人海森堡。
3543	大数据杀穷[doge][doge][doge]
3544	大数据让我看到了你的视频
3545	大数据加人工智能 如果是某度来做的话你看不到任何关于某度的负面消息 同理 你爱看电影的话在某信某付宝买电影票将没有优惠 你爱吃美食也将不会在团购网站上看到红包之类的优惠卷 甚至你逛某宝某东时候搜不出来价格低的商品 你出行买机票车票也都是原价甚至高价格的 新闻上也不会推送任何关于商家杀熟的报道和信息
3546	大数据还进行监听
3547	大数据（算法技术）杀熟，因为太了解，所以杀起来，看似无形其实是那啥（看人下刀趁火候）。
3554	从来没有点过外卖的路过[笑哭]
3555	从法律角度来说，商家利用大数据杀熟违反了两条法规，一是通过大数据收集用户个人信息，侵犯了用户隐私。二是不同的用户花不同的钱买一样的商品，却没有任何说明，侵犯了用户的知情权
3558	穿林打叶CC之前还爆出来过什么窃取信息，虽然官方已经辟谣了。但还是感觉来自数据的力量
3559	穿林打叶CC下次点外卖先放进购物车，有红包再点进去，get??
3562	炽英回复 @PSP实况足球 :怀疑腾讯会共享聊天信息，经常微信聊完啥就会在不同角落里发现广告
3568	常态了，可以试试猫眼或者淘票票的app，登录和不登陆账号的价格差别
3570	查价格波动的话，推荐喵喵折。并不是打广告。
3572	苍鹰009尚可，不过shi角有局限，只从用（窝萌）户那端考虑，平台和服务提供商的难处并没有涉及， 并且安卓平台的可以去酷 安等地方试着学习搞搞爪机，个人学学是能搞定大部分在手机端屏蔽大多数权限调用、伪装定位之类的、…，（虽然网络端还是相对暴露的）——提了一些偏技术的思路、熵业锣辑没盘——
3573	不知道有没有看过小说里说的智脑，就一个可以辅助人脑处理信息的终端。以前刚看小说那会可是很羡慕能有这么个东西，要知道什么信息，处理什么信息抛给智脑处理就是了，人脑来做最后的决定。其实手机这东西就是未来智脑的原型，但是目前是反过来的，商家利用信息差来混淆视听，看似帮我们集成了无数的信息，但是里面筛选的推送的全是他们自己的生意经，反而让我们的大脑来处理他们挖的坑，最后累得要死下单了，结果对方一点没赔，就算是光浏览没钱买人家都不赔，连你的时间都要压榨走。其实手机这东西就是未来智脑的原型，但是目前是反过来的，商家利用信息差来混淆视听，看似帮我们集成了无数的信息，但是里面筛选的推送的全是他们自己的生意经，反而让我们的大脑来处理他们挖的坑，最后累得要死下单了，结果对方一点没赔，就算是光浏览没钱买人家都不赔，连你的时间都要压榨走。所以，现在我们其实是在靠个人来和整个互联网市场对抗，互联网这个集合众人脑力…
3576	不要说不要说l我还想说b站的大数据有点厉害。。。以前推荐里面从来没有看过染发视频，然后我在小红书搜了一下花王染发之后回来b站，就出现了染发视频…[微笑]
3577	不要把资本家作的恶推到技术身上，智能手机的普及有什么错？依靠信息不对等榨取用户价值的难道不是平台商而是手机吗？
3579	不是我们依赖手机，而是单位逐步规定必须下载使用微信，钉钉，健康码！
3580	不是我们控制了数据，而是数据控制了我们。
3581	不买外卖就好了。[tv_doge][tv_doge]
3598	不懂就问，大数据和小说有什么关系?
3599	不点外卖，外出游玩吃饭现金结算不使用会员和电子优惠券，衣服鞋子也就买那几个牌子
3601	不吃外卖[喜极而泣]
3606	冰_蓝貌似现在网商平台不会直接调价格的，太明显了，一般是调优惠券，比如一个商品搞活动送券，一些人是10块，另外一些就杀熟变5块了，我自己遇到过这样的事情
3608	毕竟我什么也不买，大数据他没办法杀我啊
3609	必要的时候把手机扔了 去钓钓鱼。
3610	比起防范大数据杀熟，更重要的是尽快提升自己的价值。假如有一天你的时间比钱更值钱，就没必要浪费时间货比三家，凑优惠券，打乱消费时间之类的手段避免杀熟。有这功夫更多的钱都赚到了[微笑]
3612	比价软件过于zz
3613	比价软件不好用 面对各种组合优惠历史记录根本就不是最低价 更别提各个购物平台还有黑号这一大招
3614	比价软件
3620	爆个料，京东自营明基显示器，EW2770QZ，有两个购物页面，一个售价1999，一个售价3299，当初我问京东客服，他们说是临时调价，结果这调价调半年了，3299售价的还在那里摆着，显示器推荐现在都是推3299的，明明和售价1999的是一模一样的东西！
3621	抱歉，第一眼看成了大数据如何杀鸡[笑哭]
3623	半途去看了京东图标发的举个爪[妙啊]
3624	半年没用的拼多多昨天给了我一张满50.1减50优惠券[doge]
3634	按照up的理论难道我们为了防止大数据就要改变自己的上网习惯吗？我来给大家推荐一个最简单直接的方法：安装ghostery或者disconnect，或者任何其他防追踪插件(privacy badger， uMatrix， uBlock origin， adblock plus等等)，这些插件能防追踪、去广告、提高网页速度，还可以混用多开，反追踪查找数据商信息。该剁的手还是要剁，该点的外卖还是要点。
3635	爱着尘儿的诚儿不买必省百分百[doge]
3637	唉 jd偷听麦克风然后推荐商品怎么破？禁用权限么？
3644	??根本不买的
3647	Yan之恋88vip，让你每个月多花88块钱的尊享服务
3648	yangmqglobe回复 @下一个季后 :淘宝那些私人卖家没数据的
3649	Xbsjbbdvhxh回复 @泡沫般的回忆 :手机会记录机器码。就和试用软件过期你卸载重装还是试用过期一样
3651	wn.run/ 淘宝京东 拿走不谢
3652	vilairis跟你讲不仅会员跟非会员有区别，会员跟会员之间也不一样，前两天旁氏洗面奶会员、会员跟非会员有三个价格[微笑]其中两个会员手机不同价格就不一样了
3653	Viando卧槽[呆]我要买一部便宜手机
3654	up最后的担忧和弹幕形成的对比让我感觉有些揪心。手机与互联网的出现让生活变得更加便利，我们想要获取一个资料只需动动手指就能获取，想要和一个相隔千里的好友对话也只需要打个电话就能实现，等等等等这些都是科技的进步带来的便利。但与此同时就如一句早就说烂的老话“科技是把双刃剑”很多人都听说过，但没有人把它代入过，我们享受着科技带来的便利，同时也越来越离不开它，我们对手机的依赖性越来越强，这让我不寒而栗的想到了“奶嘴效应”我们其实早已被困在这个效应之中了——某阶级每天朝九晚五的工作，整天面对着残酷现实的社会，却迟迟等不来结果然后作为奶嘴的手机出现了，将你的注意力转移到搞笑娱乐视频让你放松的沉浸在网络之中，而做出这个奶嘴的人或有心或无意，但它已经出现了，这明明是万万不可掉以轻心的但本就出生于互联网兴起进步的时代的我们却将其无视了，因为这些东西自我们出生起就存在了，我们视其理所应当，自然不会感觉到不妥…
3659	up想多了，各种app只能服务于我，我才是主宰[doge]别一天天的各种阴谋论
3660	up完全抛开平台带来的高效，便捷不谈，单从商家获益角度，不知表达什么？本来双赢的事，愣是说成有股阴谋论的味道。回到消息闭塞没有手机，没平台可以宰你你就舒服了？无病呻吟？视频后半段我理解成你阐述现在人们过分依赖科技产品而造成冷漠现象，我觉得OK，但请不要带节奏，任何事物都有两面性，我最搞不懂一群说着科技让我们变傻，还天天玩着手机刷到这个视频的人，自相矛盾。
3663	UP你说的信息茧房不对~ 你的这个概念应该是拟态环境
3664	up你好，那个京东狗狗的动画片是啥？好想看看[大哭][大哭][大哭]
3667	sonev回复 @香蕉看看 :多下载几个软件对比酒店官网上的价格，有时候酒店官网上面的价格比这些app上面的便宜
3670	San_3只有用魔法才能战胜魔法，通过程序对账号进行不定时的随机搜索，输送远比自身更大的无用数据去掩盖自己的真实意图，然后再用另外一个账号购买，才有可能避免，届时，就是欺骗算法和推荐算法的斗争，欺骗算法能占先手优势[tv_doge]
3672	robbie6666然而真正的资本主义，会全网统一价。只要找到别家价格低，就以相同价格卖。
3677	MrBanana本尊回复 @奈何桥下无可奈何 :马油 现在真的是一点隐私都没得
3680	InfiniTwo天猫超市被发现新老用户价格不同，然后回应是bug修改了事
3683	emm我专业就是学大数据的
3685	Deer上杉真的嘛...我就是平时用美团，那用啥比较好呢？
3687	Creeper_OS手机就是我们世界的苏摩？可以这样说吗
3698	ACG的中科院化学所想不想薅资本主义羊毛？[doge][doge]
3719	[嫌弃]我是大数据杀手，应为我需要什么连我都不知道，我需要所有但又不需要任何东西[OK][OK]
3728	[蛆音娘_吃瓜群众]放进购物车退出就是我，这个不错，哇配送费好贵，我再想想[蛆音娘_吃惊]这就是我[蛆音娘_扶额]
3729	[辣眼睛]太离谱了 我和我男朋友都在淘宝搜余华的书 结果同样的书 他那边四本二十几 我这边三本六十几一本也要二十几 把我看傻了
3730	[辣眼睛]饿了么一个店吃几个月，越来越贵
3732	[吃瓜]是的，你也是大数据推荐给我的
3733	[吃瓜]时不时抽到大红包的谜团破解了，反正我也是超过20一律不点，同样的菜先看看其他商家是不是更优惠，还有怎么点更优惠反正研究好一会才会选择一个中意的优惠的下单。[OK]有时候看到最终价格10元都没有，我还会故意点到10元以免商家优惠太多，我都不好意思下单。
3737	[OK]经常搜索一下家里人想买的，然后单纯看看价格看看干嘛的，现在京东淘宝我进首页什么稀奇古怪的都在都在给我推
3739	[doge]只要搜索olay然后淘宝就会给你推荐xz代言产品，然后就省钱了[哦呼]
3740	[doge]学到了，这就卸载B站
3742	[doge]滴滴前段时间也有猫腻，一模一样的路程（非高峰）我叫的车价钱更高一点，朋友叫的比我便宜，思来想去……原因大概是手机吧，我的苹果她的是普通的安卓机[妙啊]
3751	昨晚加入购物车的某商品，刚才点开一看贵了40块钱
3752	昨天从火车站回来，直接上曹操专车47.9元。今天去火车站，在平台约曹操专车，优惠10元后是56元。
3753	最好的方法就是取消这些坏了良心的电商家
3754	自从换了新手机，京东商城就没再装手机上，近段时间京东就经常发短信通知说送话费，想要我下载，我就不理它
3765	中国消费者的消费环境极其恶劣，商家的种种套路防不胜防！拼夕夕明目张胆的诱导式消费堂而皇之，竟然没有人管！
3768	这种现象是防不胜防的，最好就是少用，或者采用游走于各平台之间，始终不做“熟客”。购买东西的时候，先放到“购物车”里，不结账，等待一段时间，让“平台”猜不到你想干嘛，平台会不断向你推荐同类商品，继续观察价格变化，继续货比三家，我通常会关注自己想买的商品相当长一段时间才下单的，除非这商品是我常买的，知道价格。
3769	这又不犯法，明码标价的事情，商家凭本事挣钱。货比三家是常识，嫌贵可以不买嘛。
3771	这是科技进步的副产品，没办法，只能接受。
3773	这个须借助国家相关部门的力量，消费者个人实在无力抵抗！
3774	这个得政府管。所有的APP都要读用户的信息，包括通讯录，相册，通话，你想到想不到的，他都要获取。我看个日历，天气预报，也要读。感觉被APP扒了个一丝不挂，太流氓了吧！
3775	这不应该叫杀熟，各平台对待新用户还有不同的优惠的
3778	在北京打车，先用滴滴打了一辆让家人坐21元，因坐不下，自己又用美团打了一辆，我选择的预估最高23元，结果来了一辆车还没到目的地就57元了
3780	有招。我就是拼多多。这招亲测好使。就是你总看你想要的东西。就是不下单，非得浏览扫到极低价格的时候。才会下单拍下。我的就是一直给我推便宜东西了，因为根据我以往的消费数据。知道给我推价高的我也真不下单
3781	有商品存在就有杀熟存在。
3785	有了立法，监管部门要积极跟进
3786	用苹果手机的人一般消费能力都比较高，价格高一点，能提供优质服务。怎么用华为老手机的人要比用苹果手机的人的价格高就不理解了！难道某滴是在帮助别人打击华为？
3787	应该重罚平台，追究高管诈骗罪，实控人欺诈罪！
3791	也该整顿一下互联网大数据了，在淘宝买了东西，或者看了东西，他会推到头条来
3792	要像商场一样，一物一价，明码标价，不得随意变动，打折促销规定时间和日期，平台自愿参加，非规定时间不得变动！
3794	携程去哪儿杀熟那叫一个厉害
3795	携程定了一个房间，下单四百多，不能取消。几天后变成三百多，到了现场，人家前台价格二百多。卸载永远不用
3796	携程订机票遇到过，回来才知道这叫大数据杀熟
3797	小米手机，可以授权给你权限，但是返回可以空
3799	线上的“大数据杀熟”和线下的敲竹杠有着异曲同工之妙。相比起面对面坐地起价和敲诈勒索这种简单粗暴的行为，“大数据杀熟”更是“杀”人于无形。
3800	现在有的商品型号只专供线上售卖，想在线下比价都比不了
3801	现在京东，不登陆都不让浏览商品了
3803	我在拼多多买了一些薯片和虾条，然后那几天在头条的一个广告快决测总是出现在我的推荐里，里面说我喜欢某类零食
3805	我用电脑买平板给手机上买平板是差一百元正
3807	我是京东plus会员，上次朋友让帮买一个硬盘，说我是会员会不会便宜点，结果plus会员的报价比我朋友的普通会员还贵几十元
3808	我碰到过价格反复，刚开始浏览一个价格，客服过后返回又是一个价格，又换别的浏览，返回看又是一个价格，始终没下线，看来看去换了三四次价格，某特价版周年活动其间事，当时有碰到这情况的友友吗？
3809	我们大力发展的5G和大数据，什么时候沦落为“杀熟”的工具了？
3810	我就是，而且我会几个平台对比！虽然我在拼多多买的东西多，但拼多多给我的价格都是比别人的低！
3812	我刚查完大数据杀熟就看到这个，又被杀一次！
3814	我常在某东买东西，搜不到物美价廉的，杀熟严重！支持爆光！支持强监管！
3815	文章题目应该改成：详述大数据杀熟以及简论如何反杀。
3818	为啥卸载？他上面不是有酒店电话吗？你把他当工具人不就行了，用它了解酒店环境，服务，价格，然后打电话直接订，没有中间商赚差价
3821	同一品类多注册几个平台，别只用一个。同一平台用过两次就换平台，会收到平台意想不到的优惠券。
3822	提前订机票和酒店，第二次再看就涨价了，不订又涨价了，你订完再看，就降价了这是我的遭遇
3823	淘宝上搜索商品必须先登录的
3824	淘宝买了个产品试试水，觉得好用想继续买，然后发现涨价了
3828	所以说，现在要线上线下对比
3829	所谓互联网思维，那些被吹嘘的无以复加的高科技或者算法，其实就是高级的厚黑学而已，凭借数据挖掘人性弱点而已，说白了就是无形中的心理战。
3835	说到底还是平台的权限太多了，可以随意存储你得浏览信息，你平时说句话就给你推送，说白了就是侵权
3836	说到底还是竞争少了。 平台上来先砸钱各种补贴，挤死其他竞争对手。然后吃了卖家吃买家，说到底本质就是中介，却攫取了最大的利益……
3837	数据分析作恶，老板、产品、开发一起作恶，
3838	时空链不会杀熟，每个供货商都有电话，可以打电话给供货商协议价格。
3841	善用法治力量，才能倒逼互联网平台用好大数据，激发科技向上向善的动能，让消费者免于被算法“算计”，让算法更好地服务于消费者。
3844	杀熟定位价格欺诈，建议规定：对平台处罚不低于1000万，对商家处罚不低于50万，对举报者奖励不低于10万。
3846	如果他们要这样，我们就一起放弃他们！放弃网络！取消关注，取消会员，大家都这样做才是釜底抽薪，平台才会认识到他们的错！
3848	缺乏监管，要失去控制
3849	去哪网订酒店，下单时候要求我授权通讯录就给1744的优惠价，不然就是2044元一晚，没有下限！
3850	去哪儿网杀熟更严重，一分钟内定酒店就两个价格，而且还差两份早餐。
3852	亲身体验过杀熟，淘宝上看中一款产品，发给老婆帮我参考，老婆看了说怎么价格不一样？当时就把截图发给我，气的我撤销了订单，让老婆帮我买的
3853	普通消费者面对大数据杀熟会有非常强烈的无力感：无力发现、无力闪避、无力维权。对科技发展带来的两面性，普通人甚至产生了恐惧感。
3859	拼多多，我观察一个小东西，首次是2块多、3块多，也有贵的；过两天见不到这个价了，都4元、5元起步；再过两天7元、9元起步。我就呵呵，老子就看你玩，不回到首次价就不买
3860	拼多多，被我直接卸载了。发誓再也不用了！
3861	拚多多是低价吸引你买实际价格比宣传你看到的要高。
3863	难怪国外不欢迎国内的这些平台，大数据杀熟，泄露个人信息和隐私。
3864	某东我是plus会员，价格总是比老婆的高，因为她总是有优惠劵。打电话投诉，就说优惠劵是随机的（咋没见反过来的时候），然后要我下单，给补等值的豆，搞得没劲
3865	美团买菜就是，我买过的东西刚收货，准备再下单，发现价格已经涨了！并不是新鲜菜，而是粉丝调料一类的，这东西本身并不会说一天一个价的。
3866	没有部门管吗？都不是一时半会儿了
3869	买两次，卸载，换一款，过段时间重新安装，又算新用户，我买菜就这么操作了，不然买着买着就贵了，比去菜市场还贵
3870	买菜的平台也是，新用户有各种优惠券，老用户就很少了
3873	老夫眼睛都看花了，才明白，你这是想骗我在买一个手机，两个比价玩
3875	看了这些我想起了一句话，构建网购平台的那些大咖们，为什么不称他们是企业家，而叫资本家！这样你就明白他们的所作所为了。
3878	看到了，被吹上天的大数据，在我们这里就是用来“杀熟”的。
3879	开通专门的投诉小程序，专门曝光不良平台
3882	京东上，同一个商品，同一个详情页，不同的商家，换不同的价格卖。。价格相差4-10倍不等。
3885	京东，同一个产品我plus的价格比我老公手机搜出来贵很多。气愤
3889	国家应该制定政策，两个用户同时登陆，存在杀熟除以罚款，客户免费就行了呗。
3890	国家法律直接制裁大数据管理，从源头管理
3892	怪不得社会上熟人与熟人之间越来越陌生了，原来是大数据惹的祸！在设计大数据杀熟的时候，副产品就是人情越来越不值钱。
3894	反杀就是用苹果手机，苹果不允许APP跟踪，而且苹果联网默认都是不停变换MAC地址。没办法杀熟。
3895	哆嗦了一大堆，一句重点的都没有。平时关闭GPS，电商平台一律不给GPS权限。
3896	多看几个平台，
3898	对杀熟行为应该重罚，直至其破产，太可恨了，另外对大数据的使用应更严格监管，严防被滥用
3902	滴滴打车就遇到过
3904	的确是这样，我在京东看某品牌化妆品，把链接给老公发过去，结果他看到的价格比我低10元！
3905	大数据有可能成为诈骗犯的重要工具，真不提倡民用。
3906	大数据就被拿来干了偷鸡摸狗的事！啥时候咱们才能不耍这种小聪明、干点有大智慧的事情！
3907	大数据不是为了服务生活。而是为了大熟和精准推送广告！我们的公司也要学美国的大公司有点志向！搞高科技AI上太空什么的，老是卖菜杀熟志向低了点！
3908	大数据被玩坏了！这要是针对单个学生进行因材施教还是非常有效率的，对国家建设、民族优化能起到增效的作用。可惜，到无良商人手里就变成了社会信任危机！
3909	大数据，是时代的进步，不过已经开始逐步的滥用了，干什么什么都要提你的大数据信息，人门一拿起手机后台就不知道有多少app在查自己的大数据，百姓自己举证，何其艰难。
3910	打击垄断，多用其他平台，此招可解！ 反之，任宰之！
3915	不应该消费者去查证，应该由监督部门不定期抽查，一旦发现以一罚万，这才是办法。
3920	@滴滴出行 你们太不厚道了！果断选择美团打车！亲自实验过同样的距离两者之间差五分之一左右的价格！！
3921	@315消费 @中央政法委长安剑 @人民日报 @CCTV4今日关注 @新华社 @中国青年报 @最高人民检察院 @最高人民法院 @公安部网安局 @南方都市报
3923	昨天饿了吗点个鸡，两部手机选的同一个东西，差了3块～
3924	最新的科学技术一定是被资本首先服务于自身利益。只要是沾新字的各种现象大家一定要小心。共赢的事情很少，坑儿居多。比如：有了网上挂号看病之后，看似不用病人排队了，事实上是医院省去了很大一部分人工成本，而作为看病老人居多的多数患者，因为不熟悉网上运作，只能靠家里的晚辈去帮忙，也就是说，医院节省了费用，而信病人和家属却增加很多困难和成本。原来老人看病，自己一个人就能去医院就行，现在不得不让晚辈陪同前往。不然的话看病就是一件很糟心的事，问也问不清楚，老遭白眼。
3929	资本家的本性就这样，需要的是监管
3973	专门不停的注册电话小号然后就能享受更优惠，用一段时间，注销后再申请一个，养一个小号比大数据杀熟便宜多了。
3983	中国电信也一样，我，用了电信12年的老用户，每月239，手机流量1G，宽带100M，600分钟通话。新用户开户，89元就有这待遇，而且手机流量为5G。我默默的把电信卡从手机抠出来丢进了厕所，把光猫扔垃圾桶。然后办了个移动卡，59每月，每月手机流量40G，宽带200M（移动的宽带的确没电信稳定）， 虽然包的通话分钟数每月只有30分钟。
3984	至少两个手机
3987	支撑大数据的公司都是巨无霸，比如我在淘宝看了一款剃须刀，后面的几天时间在各种APP都能看到这个剃须刀的广告，这种公司你人民网得罪不起
3988	正常的网络订房价格都比酒店公示价格便宜很多。
3989	真没想到还有这套路！大数据，看来就是精准宰客的意思了。 走过千路万路，还是走不出人家的套路。
3990	真没想到还有这套路！大数据，看来就是精准宰客的意思了。 走过千路万路，但永远也别想走出人家的套路！
3991	这种现象很常见，利用信息差进行收取不正当费用，在面对这种状况可以向市场监督局举报投诉，并向电视台或者新闻站投稿举报，这样人民都监督还有那个商家敢这样做？
3992	这种杀熟行为很无耻，却让消费者投诉无门！简单的道理，就是我的会员级别越高，应该享受的价格最优惠！事实上平台就是把非会员优惠力度大慢慢培养成会员，然后呢，开始杀熟！
3993	这种情况早就发现了。同样商品，不同账号搜索，给的价格、活动是不一样的。 因为大数据根据我们的消费习惯，给我们话了一个像，偏高、倾向、消费能力……比如，一盘炒螺丝，卖张三12元，卖李四16元，感觉不是很明显，也能接受，但是，高价比低价贵了33％！！！比如买被子，最好都是品牌的，可能妻子打开链接就是899（各种优惠、活动，都有明目的），丈夫打开就是989（男人相对价格不敏感一些）。
3999	这年头太多潜规则了，打个滴滴，华为跟苹果差价快贵多一半谁之过，国家应该不允许这样的事情才对……
4001	这么一说 上次买螃蟹 京东也是 跟我跟媳妇看的价格不一样
4005	这叫信息泄露，要重罚
4007	这个应该可以上明年的央视315消费晚会
4008	这个是真的，本人亲身体验。同一家酒店，在携程同事（非会员）预订比我这个金牌会员预订要便宜100多元，我不登录，无论是在台式机还是手机，结果都是一样的。只能说，现在市场亟待整顿，携程、去哪儿、艺龙都是一样的。
4011	这个不好说，百亿补贴进去的和不经过百亿补贴页面进去价格是不一样的
4014	这不是价格欺诈吗？你不是明码标价，你是看人下菜碟，古代这种行为叫黑店！
4015	这不就是自古买卖人就存在的东西吗么，见人说人话见鬼说鬼话，看人下菜，好说话价格高点，不好说话少挣也就卖了。
4017	这不叫大数据杀熟，这是价格欺诈。
4019	找温泉酒店，APP上320，我直接打电话过去180
4022	早就发现这个问题了，包括网购很多这种情况。在网上查询时都是先用别的帐号先搜，再用自已的帐号对比购买。
4023	早就发现了，我和媳妇儿用某宝搜索同样的东西，结果出现物品的价格相差巨大。
4026	在携程上也是遇消费欺诈，一张火车票比在铁路的公众号贵约三分之一，发现后从此不再用携程
4027	在微信我定了几次机票后价格就比没定过机票的别的平台贵了好多
4028	在去哪网，订机票就是杀熟客。太狠了！
4029	在大数据泛滥的年代，不过是强者手上的又一先进武器，更方便快捷
4032	原来大数据是这样用的…
4033	原本以为互联网和其他技术到来会让信息更加透明，现在看是越加的信息不对称，原来你可能还会知道自己被宰了，以后你都没有感知，哎，努力搬砖吧
4034	遇到过，投诉无果
4035	又或者命令禁止这样的公司建立数据库，害人的数据库没必要存在
4039	用微信买飞机票 ，如果你连续几天看同一航班，你会发现涨价了，后面的日期也涨价了。
4040	用去哪儿网订酒店价格比美团便宜但是美团种类比去哪儿网多，比如电竞房之类
4042	用国产手机和苹果手机你再试试呢？也有惊喜在等待哦
4043	应该治理
4044	音乐平台杀熟才严重呢，本来一首不要vip就能听的音乐，听的多了就变成vip了，换个手机不用vip还能听
4045	音乐播放软件的同一首歌，新用户听完整的，老用户需要付费听，几乎所有的app都是这副德行
4050	移动公司大数据杀熟最明显，知道你的号码不会换，话费就比较高，除非换号，否则更换套餐没用
4051	也别怪美国人拿咱们的隐私说事
4052	要死了，我全家出去旅游一直只用去哪儿，原来这样黑啊！！！卸载！
4053	要不怎么赚钱，每天都价格战了
4054	要不然要大数据有啥用
4058	卸载后你的手机号，姓名，省份证信息仍在大数据中
4061	携程也是这德行，我用了接近20年的钻石贵宾定房间还没我老婆的普通会员价格便宜
4062	携程也是一样，如果你订了机票，那目的地的酒店价格就上涨了，换一个手机就便宜，这就是杀熟
4065	携程10月15去深圳的机票和酒店也遇到同样情况
4066	携程，甚至如家酒店都是杀熟
4068	小肠陈吃卤煮：我开车导航路过，在高德定的一个一人份套餐31元，菜底+火烧2个+北冰洋1瓶，拼桌一个他们的老主顾，聊天得知他35元菜底+火烧1个，老主顾气饱了
4071	现在这风对马云不利了
4072	现在下载每个app都要允许查看你手机的信息，包裹照片等等，tam的这不是违法犯罪吗？用你软件非要把手机查个底朝天，再说这跟用你软件有什么关联
4073	现在杀熟更厉害，都定位了，不可能让你发现价格不一样。
4074	现在很多平台都这样的，尤其拼夕夕
4075	现在各种APP都用上了"杀熟"手段，共享单车，不同的人不同的价格，骑的越多价格越高
4076	现在搞促销的，关注京东的同一商品搞活动前价格搞提高20%左右，然后在促销，结果比正常售价也没便宜多少。所以一般在网上买东西，先把商品放几个月看看那天价格美丽。
4080	系统平台在想，既然有钱开会员，肯定有钱了，我们没开会员的肯定穷，所以就宰有钱的了
4081	无奸不商，一点不错！我就被大数据杀过，同样的东西，我买比我老婆买要贵四五百，也有出现过我买的东西爱我老婆买的便宜几十块钱一个
4082	我自己的京东账户用了十年了，买啥都贵。我爱人一下子注册了四个账户，买奶粉对比着买，比我的老号便宜10%到20%。大数据杀熟有违法经营之嫌，希望有关部门重视。
4085	我在支付宝的商家服务里面买到帐音响，同一款产品，两个帐号，两种价格，相差70元
4086	我在携程去哪网订火车票飞机必须加手续费，不然不给出票，但在快票网就可以比用付手续费
4087	我在某平台买商品，叫老婆看一下，同个平台，同一个商家，同一个产品，她的手机上显示的价格竟然比我手机上显示的便宜几十（她的显示优惠活动，我的没有显示，难道因为看经常买），就让她下单了。
4088	我用滴滴最能感受到，都不用换手机看，买了几张减6元优惠券，减下来的价格跟我没买之前差1元，我是买了个寂寞吗，之后用的少了还总发优惠券给我
4090	我也遇到这种情况，金卡会员都不如不用会员便宜！
4094	我同一个携程账号，小程序和app价格都不同……
4095	我同事的苹果手机，总比我们贵一点
4096	我同时下载好几个APP，价格都不一样，而且数骆驼最坑
4098	我手机就跟别人搜索不一样
4099	我是接受媒体调查大数据杀熟的其中一人，
4100	我深有体会，我和一个同事看同一个酒店，他看八九百，我看只要四五百。我很少出门，她经常出去旅游。这可能就是大数据。
4101	我认为只能人为干预了，我现在基本上是用手机号码注册了帐号购买商品后，等订单完成后就注消帐号，下次再重新注册，反正我手机号有三个，轮流用呗。
4102	我前两天在某宝买两支唇釉，与好友都是打开同一个链接，总额竟然相信20元！这是不是大数据杀熟行为？
4104	我觉得他应该感谢去哪网！去哪网提高价格是为了给他带来心理上巨大的优越感，让他感受下有钱人的消费。
4105	我经常订酒店，儿子从不订酒店，我们俩同时订同一家酒店，我就比他贵，杀熟是真的！
4106	我的数据我作主
4108	我常在饿了么一家烧烤店买烧烤，因为觉得他们家的味道很合胃口，所以经常点，结果上次我再次点餐的时候，意外发现同样的东西价格高了很多，我想这是不是在杀熟，气得我直接取消订单了
4109	为什么要去去哪儿订，去旅行社直接问不香么
4111	为什么非会员比会员的价格低？这是商家的一个入套营销，我们这里价格很优惠，成为会员更优惠！当非会员发现价格真的很优惠，那就成为会员吧。当成为会员时，已经成功入套，商家就不再有优惠，反而价格更高。商家的下一个目标是非会员，于是，一个个人就这样入套了。
4115	网上买东西好处不就是可以比价吗？各个平台比一下呀！
4116	网络上所有平台会员一律不开，当你向他们敞开你的钱包时，你希望他们能给你特权帮你省钱，迎来的却是更加锋利的刀和更加讽刺的嘲笑。
4118	完善细化法律法规，对欺瞒顾客的要重罚加上惩罚性罚款
4119	推荐用智行火车票 也可以订酒店
4122	同样美团，和女儿电话同时下单，相同商品，相同收货地址相同时间，我有外卖配送费，女儿的没有，虽然就几块钱，为什么要区别对待？
4124	同个账号也杀熟，根本不用两账号。我亲自碰到的。用携程先下单订了一个酒店房间后，再要订另外一个酒店的房间显示价格226元；把前一个酒店房间免费取消退掉后，再订这个另外一个酒店的房间显示价格204元！
4125	同程旅游典型杀熟。特别是我买了年会员居然比没有买会员定酒店还贵
4126	同程旅游典型杀熟。特别是我买了年会员居然比没有买会员定酒店还贵
4127	通病的还有航空公司机票 也是杀熟
4128	听说苹果手机的高于安卓手机，不知道真假
4129	天猫京东拼多多，都千人千面，城里人个农村人，买东西价格不一样，还有，新号老号也不同。
4131	淘宝也一样，我88会员，在天猫超市买东西结算还没有我媳妇没会员结算的便宜
4132	淘宝也一样，天猫店
4135	淘宝也是，我常在一家店买东西，帮别人也买了很多。一次在别人手机操作，比我便宜，又试了几个手机，都比我的便宜。
4136	淘宝天猫也存在这种情况
4137	淘宝上的东西，不急用可以加购物车凉几天，然后你会惊奇的发现淘宝会推送一毛一样的更便宜的商品。
4138	淘宝签到一样存在杀熟行为，我的两个淘宝账号不常用的签到都是一两块甚至有十来块的奖励，经常用的老账号只有几毛钱的奖励
4139	淘宝链接分享的同一件物品，价格相差近二十元。打客服电话投诉大数据杀熟，对方说是不可能的是人家搞活动才不一样。然后我用朋友的手机把链接发过来再点进去，一分钟内价格是一样的，突然间神奇的事情发生了：自动调换页面，价格回到我之前投诉的价格
4140	太正常了，老用户价格比新用户高基本都是定律了
4141	太恐怖了！没有隐私了
4142	太可怕了，大数据杀熟
4144	太猖狂，罚款10个亿！！！！？
4148	所以我下载了飞猪、携程、同程、美团、去哪儿同一家酒店我用这几个App都查一下价格，让他们在后台通过大数据自己恶性竞争
4149	所以我订酒店就很神经的拿我爸妈手机一一查价格。家人总笑话我一件简单的事情总是做的很复杂。 作为白金最高等级会员，绝大多数是便宜，但也确实偶尔父母的小号更便宜。真实存在这种情况。
4150	所以坚决不开会员。不管买啥东西，劝上三次直接丢下想买的东西离开，一次都不买了。
4151	所以大家不要总用一款软件
4152	所谓的大数据就是偷隐私
4153	所谓的大数据、互联网、人脸识别等技术，运用得好，社会在不断进步，要是被这些不法分子、无良黑心商家运用就成了攫取不法利益的工具了
4157	送上热榜让更多人关注，让相关部门重视，解决欺诈不公平
4158	四个月前卸载了美团，就是因为跟我老公住酒店，同样的房间，他订比我订便宜，立马卸载美团不用了。
4160	说到底还是隐私，凭什么能抽取使用人的个人习惯和信息？
4162	首先是店家到底想真的优惠会员还是另有营销技巧，技术是为人服务的，游戏规则始终是店家制定。
4166	是时候抛弃一些平台，自己的事情自己做，不需要一些第三者参合进来！！我们拒绝被割！
4172	上周在飞猪定酒店，因为一些原因退单了。隔两天重新定相同的，居然优惠了30大洋
4173	上次我用一个APP购票，要多收10块钱，一点都不厚道。
4175	商业欺诈 望有关部门严惩
4176	啥都不买，吃瓜
4180	杀熟很久了，2013年嘀嘀就杀熟，同样的目的地，我俩人的手机显示要价都不一样，差三成！美团杀熟算老几?拍的上号吗?
4181	杀熟成常态了，外卖，住宿，滴滴都有这样的情况
4186	如何监督掌握了全民数据的寡头，这是个急需解决的难题
4192	确实这样，所以我美团和饿了么来回用，任意一个久了不用，就会天天送你大额红包
4193	确实有这种现象，之前在携程就遇到过这种情况，只要你浏览过几次后台就回自动更改报价，第一次跟你实际购买是的价格有上涨，中间很短时间
4197	确实，上次我和朋友两人，同一个酒店房型，就相差几十块钱，??的
4198	去哪网退票非常难！定了一次机票，跟他们沟通了无数次，花了近半年才给我退回来。以后就卸载了，再也不用了。第三方平台看似便宜特费劲！
4199	去哪网好像真的会杀熟，我会经常出差定酒店，所以跟其他不会经常定酒店的同事只一起出差时，每次住的都会贵一些。但，其实跟同事住的都同酒店，同日期，同房型。因为差的金额不多，也的确没有别的办法，所以也知道被杀熟了，也没有办法……
4200	去哪就是垃圾，提前半天火车票退不了，客户态度极差
4201	去哪儿已经不用了，好几次都发现同样问题价差不是一点点
4202	亲身经历，美团也一样
4203	强力要求国家对互联网各经营平台、金融平台等严厉监管立法！
4209	苹果手机比安卓手机贵
4211	拼夕夕上你经常浏览的东西价格都贵 都是套路
4215	朋友们：一定不要办理各种会员，拒绝各种App，更不要成为老客户比如中国移动的，套餐价格涨上去就得一直涨，不允许你换低于当前套餐，......都是商家套路，或叫圈粉，又称杀熟，本质是利用信息不对称的商业欺诈，已经到了群起而愤之的地步，需要政府监管部门干预，需要法律予以规范，刻不容缓
4218	你要是在携程网，去哪儿网，反复搜索三次同一地点的飞机票，你会发现一次比一次贵，哈哈
4219	你为什么会跟你老公分开住同一个酒店
4220	你们信么，在飞猪上买机票，买的延误险我和我老婆两个人的条款完全不同。我这次才发现的
4225	能用得起上万苹果的，当然会比用一千多手机的贵。
4230	那的价格比头几年搜的高一倍了，现在我用拼多多了
4233	秒删去哪儿了。
4236	美团外卖也是，我和同事订餐页面和价格优惠不一样
4237	美团外卖都杀熟
4238	美团外卖，同一家龙虾店我开会员和朋友不开会员的菜品和单价，优惠折扣都不一样，我一开始还以为下了个假的美团
4239	美团的酒店最扯了，同一家店，每次定价格都不一样，第一次最便宜，一天比一天贵，隔了一段时间再去看，更贵了。
4241	美图外卖，我也遇到过这样得问题
4242	每次下单多对比就好了
4244	没大数据，选择困难症；有大数据，选择依赖症；怪谁？别怪大数据被用“偏”了，不“偏”无“利”，谁给你免费做数据？提高自我辩识能力，能做到不相信天上会掉下免费的午餐馅饼，很多事就释然了。
4245	没错，我用飞猪发现这个问题！平台越来越欺诈
4249	马上出台法律法规啊，发现杀熟，马上封店封平台，有这样的魄力吗？
4251	另外还想吐槽一下有些浏览器推送的广告，低俗恶劣，成年人都不想看更不用说推送的受众还有未成年人
4252	两年前就发现去哪儿就这样了，才不用的
4258	滥用大数据，后患无穷
4260	可以说商家搞大数据就是为了时时窃取数据，抓住时机坐地起价，一并诱导各种会员式杀熟！
4261	可以公布一下，然后全名抵制就行了
4264	看来以后要多准备几个手机号询价，现在所谓的高科技大数据已经不是用在提供民众生活体验，而是用来杀熟了。怪不得，我买东西，习惯去同一家店，却发现越买越贵
4265	看来经常换手机号是对的，换手机号前要注销帐户
4267	开出巨额罚款，一定可以解决掉的
4270	就是垄断，资本的游戏而已你还想得便宜？
4272	经常用携程定房间，有次用爱人手机下单，才发现老客户贵好几十
4281	京东会员，我媳妇儿不是会员，没发现会员更贵。但是京东商品价格浮动太大，一会儿优惠300，一会儿还涨价，如果贵的东西关注一段时间才买。
4282	京东会员，买自营的手机同时搜，我媳妇儿的非会员有30优惠券，我有会员的屁优惠没有
4285	京东，携程，还有比这俩更坑的吗？ 杀熟，我们是专业的！
[truncated: 8,562 more rows]
